# Supplementary material for: One-pot and metal-free synthesis of atropisomeric carbazolyl-indoles by a facile [4 + 2]-benzannulation in ethanol and investigation of their photoluminescence property
Source: Royal Society of Chemistry journal article supplement (doi:10.1039/d4qo00256c), 2024-01-01
Supplement: d4qo00256c1.pdf [file d4qo00256c1.pdf]

# One-pot and metal-free synthesis of atropisomeric carbazolyloindoles by a facile [4+2]-benzannulation in ethanol and investigation of their photoluminescence property

Shuai-Jiang Liu, ‡<sup>a</sup> Xiao-Chen Liu, ‡<sup>a</sup> Sheng-Nan Wen,<sup>a</sup> Bo Han,<sup>a</sup> Wei Huang\*<sup>a</sup> and Qian Zhao\*<sup>a</sup>

<sup>a</sup> State Key Laboratory of Southwestern Chinese Medicine Resources, Hospital of Chengdu University of Traditional Chinese Medicine, School of Basic Medical Sciences, Chengdu University of Traditional Chinese Medicine, Chengdu 611137, China. E-mail: zhaoqian@cdutcm.edu.cn, huangwei@cdutcm.edu.cn

‡These authors contributed equally to this work.

## Supporting Information

### Table of Contents

|                                                                                                                    |    |
|--------------------------------------------------------------------------------------------------------------------|----|
| <b>1. General Information</b> .....                                                                                | 2  |
| <b>2. General Procedure for Synthesis of Compound 3</b> .....                                                      | 2  |
| <b>3. Synthesis of Intermediate 3a'</b> .....                                                                      | 21 |
| <b>4. Screening of Catalysts for Atropselective Synthesis of Axially Chiral Carbazolyloindole 3a</b> .....         | 22 |
| <b>5. The Scale-Up Reaction</b> .....                                                                              | 23 |
| <b>6. Synthetic Transformations of 3a</b> .....                                                                    | 24 |
| 6.1 Procedure for Synthesis of Compound 4 .....                                                                    | 24 |
| 6.2 Procedure for Synthesis of Compound 5 .....                                                                    | 25 |
| 6.3 Procedure for Synthesis of Compound 6 .....                                                                    | 26 |
| 6.4 Thermal stability experiments .....                                                                            | 27 |
| <b>7. X-ray Crystal Structures of 3ah</b> .....                                                                    | 28 |
| <b>8. HPLC Spectra for Screening of Catalysts</b> .....                                                            | 31 |
| 8.1 HPLC Spectra of Intermediate 3a' .....                                                                         | 31 |
| 8.2 HPLC Spectra of compound 3a .....                                                                              | 36 |
| <b>9. UV-Vis Absorption Spectroscopy, Fluorescence Emission Spectroscopy and Fluorescence Quantum Yields</b> ..... | 38 |
| <b>10. NMR Spectra of Compound 3</b> .....                                                                         | 39 |
| <b>11. Reference</b> .....                                                                                         | 78 |

## 1. General Information

High Performance Liquid Chromatography (HPLC) was analyzed by chiral column in comparison with authentic racemates, using a Daicel Chiralpak AD-H Column (250 × 4.6 mm), Daicel Chiralpak OD-H Column (250 × 4.6 mm), and UV detection was performed at 220 nm or 254 nm. Nuclear magnetic resonance (NMR) spectra were recorded in CDCl<sub>3</sub> or DMSO-*d*<sub>6</sub> on Bruker 600 or 700 MHz NMR instrument (at 600, or 700 MHz for <sup>1</sup>H, and at 150, or 175 for <sup>13</sup>C). Protonchemical shifts are reported in parts per million (δ scale). The <sup>1</sup>H NMR chemical shifts are reported in ppm with the internal TMS signal at 0.0 ppm as standard. The <sup>13</sup>C NMR chemical shifts were given using CDCl<sub>3</sub> or DMSO-*d*<sub>6</sub> as the internal standard (CDCl<sub>3</sub>: δ = 77.00 ppm, DMSO-*d*<sub>6</sub>: δ = 39.52 ppm). Data are reported as follows: chemical shift [multiplicity (s = singlet, d = doublet, t = triplet, q = quartet, m = multiplet), coupling constant(s) (Hz), integration]. High-resolution mass spectra (HRMS) were obtained using Agilent P/N G1969-90010. High-resolution mass spectra were reported for the molecular ion [M+H]<sup>+</sup> or [M+Na]<sup>+</sup>. X-ray diffraction experiment was carried out on Agilent Gemini or Agilent D8 QUEST and the data obtained were deposited at the Cambridge Crystallographic Data Centre. UV detection was performed at 254 nm. Column UV detection was performed at 254 nm. Column chromatography was performed on silica gel (200–300 mesh) using an eluent of ethyl acetate and petroleum ether. TLC was performed on glass-backed silica plates; products were visualized using UV light. All reagents and solvents were obtained from commercial sources and used without further purification. Oil baths were used as the heat source. Melting points were recorded on BUCHI Melting Point M-565 instrument. 2-indolyl acrylate **1**<sup>1-4</sup> and propargylic alcohol **2**<sup>5,6</sup> were prepared according to the literature procedures. The detail characterization of new compounds is shown as following. All UV-vis absorption spectra and fluorescence emission spectra were performed on a TU-1901 spectrophotometer (Persee, China) and a F-380 fluorescence spectrophotometer (Gangdong SCI.&TECH, China), respectively.

## 2. General Procedure for Synthesis of Compound 3

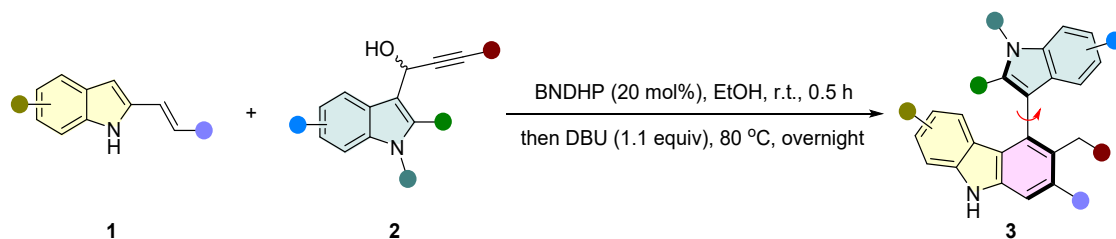

To a dry flask, absolute ethyl alcohol (1.0 mL) was added to a mixture of 2-indolyl acrylate **1** (0.1 mmol), propargylic alcohol **2** (0.1 mmol) and ( $\pm$ )-1,1'-binaphthyl-2,2'-diylhydrogenphosphate (BNDHP) (20 mol%). Then, the mixture was stirred at room temperature for 0.5 h. After 0.5 h, DBU (1.1 equiv.) was added to the mixture and the mixture continued to be stirred at 80 °C overnight. The reaction mixture was monitored by TLC, the solvent was evaporated under reduced pressure and the residue was purified by flash column chromatography to yield the corresponding product **3**.

**ethyl 3-benzyl-4-(1-benzyl-2-phenyl-1*H*-indol-3-yl)-9*H*-carbazole-2-carboxylate (3a)**

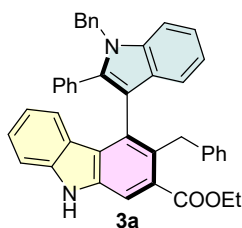

The residue was purified by a silica gel flash chromatography (PE/EA = 5/1) giving the product **3a** as a white solid in 90% yield (55.1 mg), m.p. 126-129 °C. <sup>1</sup>H NMR (600 MHz, Chloroform-*d*)  $\delta$  8.19 (s, 1H), 7.88 (s, 1H), 7.39 (d,  $J$  = 8.1 Hz, 1H), 7.35 (d,  $J$  = 8.3 Hz, 1H), 7.33 – 7.30 (m, 1H), 7.30 – 7.26 (m, 2H), 7.24 (d,  $J$  = 7.9 Hz, 1H), 7.18 (t,  $J$  = 7.2 Hz, 1H), 7.13 – 7.04 (m, 4H), 7.00 – 6.87 (m, 8H), 6.83 (d,  $J$  = 7.8 Hz, 1H), 6.79 (t,  $J$  = 7.4 Hz, 1H), 6.60 – 6.55 (m, 2H), 5.44 (d,  $J$  = 16.6 Hz, 1H), 5.39 (d,  $J$  = 16.6 Hz, 1H), 4.36 (d,  $J$  = 16.0 Hz, 1H), 4.20 (d,  $J$  = 16.0 Hz, 1H), 4.09 – 3.99 (m, 2H), 1.09 (t,  $J$  = 7.1 Hz, 3H). <sup>13</sup>C NMR (151 MHz, Chloroform-*d*)  $\delta$  169.1, 142.2, 140.9, 138.3, 138.0, 137.2, 137.1, 132.1, 131.4, 130.6, 129.9, 129.9, 128.7, 128.37, 128.3, 128.1, 127.7, 127.5, 127.3, 126.9, 126.4, 126.3, 124.7, 123.1, 122.9, 122.4, 120.3, 120.1, 119.6, 112.8, 112.2, 110.5, 110.4, 60.9, 47.9, 35.6, 14.0. HRMS (ESI-TOF)  $m/z$ : [M+Na]<sup>+</sup> Calcd for C<sub>43</sub>H<sub>34</sub>N<sub>2</sub>NaO<sub>2</sub><sup>+</sup> 633.2512, found 633.2511.

### 3-benzyl-4-(1-benzyl-2-phenyl-1*H*-indol-3-yl)-9*H*-carbazole-2-carbonitrile (**3b**)

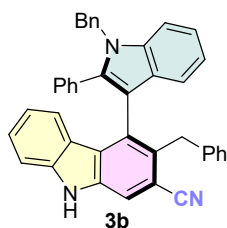

The residue was purified by a silica gel flash chromatography (PE/EA = 5/1) giving the product **3b** as a white solid in 90% yield (50.8 mg), m.p. 138-140 °C. <sup>1</sup>H NMR (600 MHz, Chloroform-*d*) δ 8.22 (s, 1H), 7.68 (s, 1H), 7.39 – 7.31 (m, 3H), 7.29 (dd, *J* = 8.1, 6.4 Hz, 2H), 7.27 – 7.23 (m, 1H), 7.18 (t, *J* = 7.1 Hz, 1H), 7.14 – 7.06 (m, 3H), 7.01 – 6.95 (m, 3H), 6.95 – 6.91 (m, 4H), 6.87 (d, *J* = 7.3 Hz, 3H), 6.81 (t, *J* = 7.2 Hz, 1H), 6.75 – 6.67 (m, 2H), 5.46 (d, *J* = 16.6 Hz, 1H), 5.41 (d, *J* = 16.6 Hz, 1H), 4.15 (d, *J* = 15.5 Hz, 1H), 4.03 (d, *J* = 15.5 Hz, 1H). <sup>13</sup>C NMR (151 MHz, Chloroform-*d*) δ 141.0, 139.9, 138.1, 138.9, 137.3, 137.0, 135.0, 131.1, 131.0, 129.7, 128.7, 128.5, 128.3, 128.2, 128.0, 127.9, 127.8, 127.4, 127.3, 126.3, 125.6, 123.1, 122.6, 120.5, 120.0, 119.9, 119.8, 114.9, 111.6, 110.7, 110.6, 110.0, 48.0, 37.1. HRMS (ESI-TOF) *m/z*: [M+Na]<sup>+</sup> Calcd for C<sub>41</sub>H<sub>29</sub>N<sub>3</sub>Na<sup>+</sup> 586.2254, found 586.2256.

### (3-benzyl-4-(1-benzyl-2-phenyl-1*H*-indol-3-yl)-9*H*-carbazol-2-yl)(phenyl)methanone (**3c**)

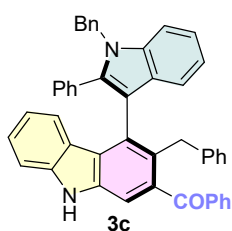

The residue was purified by a silica gel flash chromatography (PE/EA = 5/1) giving the product **3c** as a brown oil in 75% yield (48.0 mg). <sup>1</sup>H NMR (600 MHz, Chloroform-*d*) δ <sup>1</sup>H NMR (600 MHz, Chloroform-*d*) δ 8.23 (s, 1H), 7.48 – 7.42 (m, 3H), 7.41 – 7.36 (m, 2H), 7.33 (dd, *J* = 12.8, 8.1 Hz, 2H), 7.31 – 7.27 (m, 2H), 7.26 – 7.19 (m, 4H), 7.18 – 7.15 (m, 1H), 7.13 – 7.06 (m, 6H), 6.96 – 6.89 (m, 2H), 6.81 (t, *J* = 7.6 Hz, 1H), 6.77 – 6.75 (m, 2H), 6.57 – 6.43 (m, 2H), 5.50 (d, *J* = 16.6 Hz, 1H), 5.44 (d, *J* = 16.7 Hz, 1H), 3.93 (d, *J* = 15.7 Hz, 1H), 3.68 (d, *J* = 15.8 Hz, 1H). <sup>13</sup>C NMR (151 MHz, Chloroform-*d*) δ 199.0, 141.4, 140.6, 138.3, 138.2, 138.0, 137.8, 137.3, 137.1, 132.6, 131.7, 131.2, 130.1, 130.0, 130.0, 129.0, 128.7, 128.3, 128.0, 127.8, 127.5, 127.3, 126.3, 126.0, 125.8, 125.0, 123.2, 122.8, 122.4, 120.3, 120.2, 119.6, 112.9, 110.8, 110.5, 110.4, 48.0, 35.9. HRMS (ESI-TOF) *m/z*: [M+Na]<sup>+</sup> Calcd for C<sub>47</sub>H<sub>34</sub>N<sub>2</sub>NaO<sup>+</sup> 665.2563, found 665.2559.

**ethyl 3-benzyl-4-(1-benzyl-2-phenyl-1*H*-indol-3-yl)-6-fluoro-9*H*-carbazole-2-carboxylate (3d)**

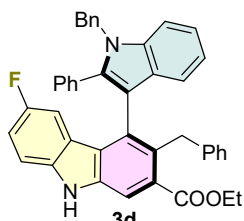

The residue was purified by a silica gel flash chromatography (PE/EA = 5/1) giving the product **3d** as a white solid in 96% yield (60.6 mg), m.p. 116 -118 °C. <sup>1</sup>H NMR (700 MHz, Chloroform-*d*) δ 8.08 (s, 1H), 7.77 (s, 1H), 7.26 (d, *J* = 8.3 Hz, 1H), 7.24 – 7.19 (m, 3H), 7.18 – 7.15 (m, 1H), 7.11 (t, *J* = 7.6 Hz, 1H), 7.04 – 6.95 (m, 5H), 6.91 (t, *J* = 7.4 Hz, 1H), 6.89 – 6.81 (m, 7H), 6.55 – 6.51 (m, 2H), 6.46 (d, *J* = 8.0 Hz, 1H), 5.36 (d, *J* = 16.7 Hz, 1H), 5.32 (d, *J* = 16.7 Hz, 1H), 4.31 (d, *J* = 16.0 Hz, 1H), 4.15 (d, *J* = 16.0 Hz, 1H), 4.05 – 3.90 (m, 2H), 1.02 (t, *J* = 7.1 Hz, 3H). <sup>13</sup>C NMR (176 MHz, Chloroform-*d*) δ 168.1, 156.9, 155.5, 141.0, 137.1 (d, *J* = 3.3 Hz), 137.0, 136.2, 136.1, 131.0, 130.2, 129.9, 129.6, 128.8, 127.8, 127.3, 127.1, 126.8, 126.5, 126.2, 125.4 (d, *J* = 4.3 Hz), 125.1, 123.8, 122.6 (d, *J* = 10.1 Hz), 121.6, 119.4, 118.9, 113.2 (d, *J* = 26.0 Hz), 111.4, 111.1, 109.9 (d, *J* = 9.2 Hz), 109.6, 107.1 (d, *J* = 24.8 Hz), 59.9, 46.9, 34.6, 12.9. HRMS (ESI-TOF) *m/z*: [M+Na]<sup>+</sup> Calcd for C<sub>43</sub>H<sub>33</sub>FN<sub>2</sub>NaO<sub>2</sub><sup>+</sup> 651.2418, found 651.2428.

**ethyl 3-benzyl-4-(1-benzyl-2-phenyl-1*H*-indol-3-yl)-6-chloro-9*H*-carbazole-2-carboxylate (3e)**

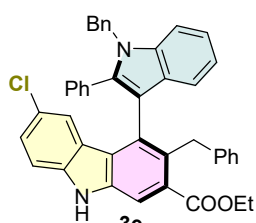

The residue was purified by a silica gel flash chromatography (PE/EA = 5/1) giving the product **3e** as a white solid in 95% yield (61.3 mg), m.p. 115-117 °C. <sup>1</sup>H NMR (700 MHz, Chloroform-*d*) δ 8.09 (s, 1H), 7.75 (s, 1H), 7.27 – 7.22 (m, 3H), 7.18 – 7.15 (m, 3H), 7.11 (t, *J* = 7.6 Hz, 1H), 7.07 (d, *J* = 7.6 Hz, 2H), 7.04 (d, *J* = 7.9 Hz, 1H), 6.98 (t, *J* = 7.1 Hz, 1H), 6.93 (t, *J* = 7.5 Hz, 1H), 6.90 – 6.83 (m, 7H), 6.80 (s, 1H), 6.58 (d, *J* = 7.8 Hz, 2H), 5.37 (d, *J* = 16.8 Hz, 1H), 5.32 (d, *J* = 16.8 Hz, 1H), 4.36 (d, *J* = 16.0 Hz, 1H), 4.19 (d, *J* = 16.0 Hz, 1H), 4.02 – 3.92 (m, 2H), 1.03 (t, *J* = 7.1 Hz, 3H). <sup>13</sup>C NMR (176 MHz, Chloroform-*d*) δ 168.1, 141.0, 138.0, 137.1, 137.0, 136.6, 136.2, 131.3, 130.2, 129.9, 129.7, 128.8, 127.9, 127.3, 127.0, 127.0, 126.8, 126.6, 126.2, 125.4, 125.0, 124.6, 123.9, 123.8, 123.1, 121.6, 121.2, 119.4, 118.9, 111.3, 111.0, 110.33, 109.7, 60.0, 47.0, 34.6, 12.9. HRMS (ESI-TOF) *m/z*: [M+Na]<sup>+</sup> Calcd for C<sub>43</sub>H<sub>33</sub>ClN<sub>2</sub>NaO<sub>2</sub><sup>+</sup> 667.2123, found 667.2121.

**ethyl 3-benzyl-4-(1-benzyl-2-phenyl-1*H*-indol-3-yl)-6-bromo-9*H*-carbazole-2-carboxylate (3f)**

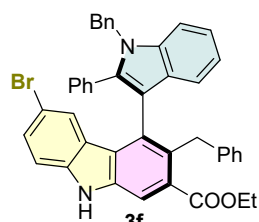

The residue was purified by a silica gel flash chromatography (PE/EA = 5/1) giving the product **3f** as a white solid in 94% yield (65.1 mg), m.p. 108-110 °C. <sup>1</sup>H NMR (600 MHz, Chloroform-*d*) δ 8.15 (s, 1H), 7.82 (s, 1H), 7.38 – 7.32 (m, 3H), 7.31 (d, *J* = 8.2 Hz, 1H), 7.25 – 7.23 (m, 1H), 7.21 – 7.18 (m, 2H), 7.16 (d, *J* = 7.7 Hz, 2H), 7.12 (d, *J* = 7.9 Hz, 1H), 7.06 – 7.03 (m, 2H), 7.02 – 6.99 (m, 1H), 6.98 – 6.91 (m, 7H), 6.66 (d, *J* = 6.8 Hz, 2H), 5.45 (d, *J* = 16.8 Hz, 1H), 5.39 (d, *J* = 16.8 Hz, 1H), 4.44 (d, *J* = 16.0 Hz, 1H), 4.27 (d, *J* = 16.0 Hz, 1H), 4.10 – 4.00 (m, 2H), 1.12 (t, *J* = 7.1 Hz, 3H). <sup>13</sup>C NMR (151 MHz, Chloroform-*d*) δ 169.1, 142.0, 139.3, 138.2, 138.0, 137.5, 137.2, 132.4, 131.2, 131.0, 130.8, 129.8, 129.0, 128.9, 128.4, 128.1, 128.0, 127.8, 127.6, 127.2, 126.1, 125.4, 125.3, 124.9, 124.8, 122.6, 120.5, 119.9, 112.3, 112.3, 112.0, 111.8, 110.7, 61.0, 48.0, 35.6, 14.0. HRMS (ESI-TOF) *m/z*: [M+Na]<sup>+</sup> Calcd for C<sub>43</sub>H<sub>33</sub>BrN<sub>2</sub>NaO<sub>2</sub><sup>+</sup> 711.1618, found 711.1617.

**ethyl 3-benzyl-4-(1-benzyl-2-phenyl-1*H*-indol-3-yl)-6-methyl-9*H*-carbazole-2-carboxylate (3g)**

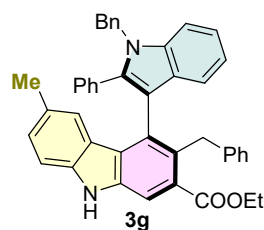

The residue was purified by a silica gel flash chromatography (PE/EA = 5/1) giving the product **3g** as a white solid in 96% yield (60.1 mg), m.p. 126-128 °C. <sup>1</sup>H NMR (600 MHz, Chloroform-*d*) δ 8.08 (s, 1H), 7.84 (d, *J* = 3.3 Hz, 1H), 7.34 – 7.31 (m, 1H), 7.30 – 7.22 (m, 4H), 7.19 – 7.15 (m, 1H), 7.15 – 7.09 (m, 4H), 7.07 – 7.03 (m, 1H), 6.99 – 6.96 (m, 1H), 6.96 – 6.90 (m, 7H), 6.68 (s, 1H), 6.60 (s, 2H), 5.46 (d, *J* = 16.6 Hz, 1H), 5.39 (d, *J* = 16.7 Hz, 1H), 4.38 (d, *J* = 16.0 Hz, 1H), 4.21 (d, *J* = 16.0 Hz, 1H), 4.09 – 3.95 (m, 2H), 2.10 (s, 3H), 1.09 (td, *J* = 7.1, 3.1 Hz, 3H). <sup>13</sup>C NMR (151 MHz, Chloroform-*d*) δ 169.2, 142.3, 139.1, 138.3, 138.0, 137.4, 137.1, 131.8, 131.4, 130.5, 129.9, 129.7, 128.7, 128.5, 128.4, 128.3, 128.1, 127.7, 127.7, 127.5, 127.2, 126.6, 126.3, 124.7, 123.3, 122.7, 122.3, 120.2, 120.1, 112.8, 112.2, 110.41, 110.0, 60.8, 47.8, 35.6, 21.5, 14.0. HRMS (ESI-TOF) *m/z*: [M+Na]<sup>+</sup> Calcd for C<sub>43</sub>H<sub>36</sub>N<sub>2</sub>NaO<sub>2</sub><sup>+</sup> 647.2669, found 647.2671.

**ethyl 3-benzyl-4-(1-benzyl-2-phenyl-1*H*-indol-3-yl)-6-methoxy-9*H*-carbazole-2-carboxylate (3h)**

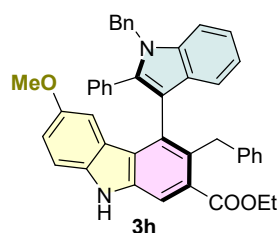

The residue was purified by a silica gel flash chromatography (PE/EA = 5/1) giving the product **3h** as a white solid in 85% yield (54.7 mg), m.p. 123-125 °C. <sup>1</sup>H NMR (700 MHz, Chloroform-*d*) δ 8.00 (s, 1H), 7.77 (s, 1H), 7.25 (d, *J* = 8.3 Hz, 1H), 7.21 (d, *J* = 8.8 Hz, 1H), 7.20 – 7.18 (m, 2H), 7.17 – 7.14 (m, 1H), 7.08 (t, *J* = 7.6 Hz, 1H), 7.05 – 7.01 (m, 4H), 6.92 (t, *J* = 7.5 Hz, 2H), 6.91 – 6.86 (m, 4H), 6.83 (d, *J* = 6.5 Hz, 3H), 6.53 (d, *J* = 7.1 Hz, 2H), 6.14 (s, 1H), 5.38 (d, *J* = 16.5 Hz, 1H), 5.29 (d, *J* = 16.5 Hz, 1H), 4.27 (d, *J* = 15.9 Hz, 1H), 4.14 (d, *J* = 15.9 Hz, 1H), 3.99 – 3.91 (m, 2H), 2.98 (s, 3H), 1.02 (t, *J* = 7.1 Hz, 3H). <sup>13</sup>C NMR (176 MHz, Chloroform-*d*) δ 168.1, 152.6, 141.3, 137.0, 137.0, 136.8, 135.9, 134.8, 130.5, 130.4, 129.4, 129.0, 128.9, 127.7, 127.3, 127.3, 127.2, 126.8, 126.5, 126.3, 125.6, 125.4, 123.6, 122.4, 121.4, 119.4, 119.3, 115.0, 111.6, 111.4, 109.92, 109.32, 104.3, 59.8, 54.1, 46.8, 34.6, 12.9. HRMS (ESI-TOF) *m/z*: [M+Na]<sup>+</sup> Calcd for C<sub>44</sub>H<sub>36</sub>N<sub>2</sub>NaO<sub>3</sub><sup>+</sup> 663.2618, found 663.2627.

**ethyl 3-benzyl-4-(1-benzyl-2-phenyl-1*H*-indol-3-yl)-7-chloro-9*H*-carbazole-2-carboxylate (3i)**

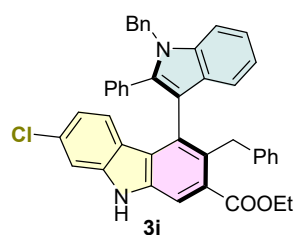

The residue was purified by a silica gel flash chromatography (PE/EA = 5/1) giving the product **3i** as a white solid in 83% yield (53.7 mg), m.p. 126-128 °C. <sup>1</sup>H NMR (700 MHz, Chloroform-*d*) δ 8.23 (s, 1H), 7.85 (s, 1H), 7.38 – 7.33 (m, 2H), 7.28 (t, *J* = 7.2 Hz, 2H), 7.26 – 7.24 (m, 1H), 7.18 (t, *J* = 7.6 Hz, 1H), 7.10 – 7.04 (m, 4H), 6.96 (q, *J* = 7.2 Hz, 3H), 6.92 – 6.87 (m, 5H), 6.74 (d, *J* = 8.5 Hz, 1H), 6.68 (d, *J* = 8.5 Hz, 1H), 6.59 – 6.55 (m, 2H), 5.42 (d, *J* = 16.5 Hz, 1H), 5.38 (d, *J* = 16.5 Hz, 1H), 4.36 (d, *J* = 15.9 Hz, 1H), 4.20 (d, *J* = 15.9 Hz, 1H), 4.09 – 3.99 (m, 2H), 1.09 (t, *J* = 7.1 Hz, 3H). <sup>13</sup>C NMR (176 MHz, Chloroform-*d*) δ 169.0, 142.0, 141.3, 138.2, 138.0, 137.3, 137.2, 132.6, 132.1, 131.2, 130.6, 130.3, 129.8, 128.7, 128.3, 128.2, 128.1, 127.8, 127.55, 127.4, 126.3, 126.3, 124.8, 123.5, 122.5, 121.7, 120.4, 120.2, 119.9, 112.5, 112.3, 110.6, 110.5, 61.0, 47.9, 35.6, 13.9. HRMS (ESI-TOF) *m/z*: [M+Na]<sup>+</sup> Calcd for C<sub>43</sub>H<sub>33</sub>ClN<sub>2</sub>NaO<sub>2</sub><sup>+</sup> 667.2123, found

667.2125.

**ethyl 3-benzyl-4-(1-benzyl-2-phenyl-1*H*-indol-3-yl)-7-bromo-9*H*-carbazole-2-carboxylate (3j)**

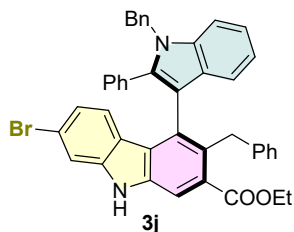

The residue was purified by a silica gel flash chromatography (PE/EA = 5/1) giving the product **3j** as a white solid in 93% yield (64.0 mg), m.p. 111-113 °C. <sup>1</sup>H NMR (600 MHz, Chloroform-*d*) δ 8.24 (s, 1H), 7.86 (s, 1H), 7.51 (s, 1H), 7.36 (d, *J* = 8.3 Hz, 1H), 7.30 – 7.24 (m, 3H), 7.21 – 7.16 (m, 1H),

7.11 – 7.04 (m, 4H), 6.96 (td, *J* = 7.7, 2.8 Hz, 3H), 6.94 – 6.85 (m, 6H), 6.63 (d, *J* = 8.5 Hz, 1H), 6.61 – 6.55 (m, 2H), 5.43 (d, *J* = 16.5 Hz, 1H), 5.38 (d, *J* = 16.5 Hz, 1H), 4.35 (d, *J* = 15.9 Hz, 1H), 4.20 (d, *J* = 16.0 Hz, 1H), 4.10 – 3.99 (m, 2H), 1.09 (t, *J* = 7.1 Hz, 3H). <sup>13</sup>C NMR (151 MHz, Chloroform-*d*) δ 169.0, 142.0, 141.6, 138.2, 138.0, 137.2, 137.1, 132.6, 131.2, 130.7, 130.5, 129.8, 128.7, 128.3, 128.2, 128.1, 127.8, 127.6, 127.4, 126.3, 126.3, 124.8, 123.8, 122.89, 122.5, 122.0, 120.4, 120.1, 119.9, 113.5, 112.4, 112.3, 110.6, 61.0, 47.9, 35.6, 13.9. HRMS (ESI-TOF) *m/z*: [M+Na]<sup>+</sup> Calcd for C<sub>43</sub>H<sub>33</sub>BrN<sub>2</sub>NaO<sub>2</sub><sup>+</sup> 711.1618, found 711.1623.

**ethyl 3-benzyl-4-(1-benzyl-2-phenyl-1*H*-indol-3-yl)-8-bromo-9*H*-carbazole-2-carboxylate (3k)**

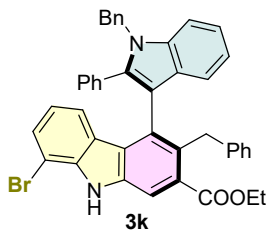

The residue was purified by a silica gel flash chromatography (PE/EA = 5/1) giving the product **3k** as a white solid in 94% yield (65.0 mg), m.p. 110-112 °C. <sup>1</sup>H NMR (600 MHz, Chloroform-*d*) δ 8.33 (s, 1H), 7.89 (s, 1H), 7.39 (d, *J* = 7.6 Hz, 1H), 7.28 (d, *J* = 8.3 Hz, 1H), 7.22 – 7.16 (m, 3H), 7.11 (t, *J* =

7.6 Hz, 1H), 7.03 – 7.00 (m, 3H), 6.98 (d, *J* = 7.9 Hz, 1H), 6.88 (t, *J* = 7.8 Hz, 3H), 6.85 – 6.80 (m, 5H), 6.67 (d, *J* = 7.9 Hz, 1H), 6.60 (t, *J* = 7.8 Hz, 1H), 6.52 – 6.48 (m, 2H), 5.36 (d, *J* = 16.6 Hz, 1H), 5.31 (d, *J* = 16.6 Hz, 1H), 4.29 (d, *J* = 16.0 Hz, 1H), 4.13 (d, *J* = 16.0 Hz, 1H), 4.03 – 3.94 (m, 2H), 1.03 (t, *J* = 7.1 Hz, 3H). <sup>13</sup>C NMR (151 MHz, Chloroform-*d*) δ 168.9, 141.9, 139.4, 138.2, 138.1, 137.2, 136.7, 132.8, 131.2, 131.2, 130.7, 129.8, 128.7, 128.4, 128.3, 128.2, 128.2, 127.8, 127.6, 127.3, 127.2, 126.4, 124.8, 124.4, 122.5, 121.8, 120.7, 120.4, 120.0, 112.7, 112.4, 110.6, 103.9, 61.0, 47.9,



35.6, 14.0. HRMS (ESI-TOF)  $m/z$ :  $[M+Na]^+$  Calcd for  $C_{43}H_{33}BrN_2NaO_2^+$  711.1618, found 711.1618.

**ethyl 3-benzyl-4-(1-benzyl-5-fluoro-2-phenyl-1*H*-indol-3-yl)-9*H*-carbazole-2-carboxylate (3l)**

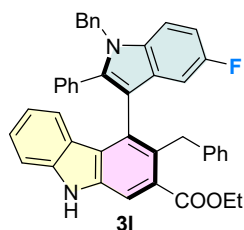

The residue was purified by a silica gel flash chromatography (PE/EA = 5/1) giving the product **3l** as a white solid in 94% yield (59.2 mg), m.p. 104-106 °C.  $^1H$  NMR (700 MHz, Chloroform-*d*)  $\delta$  8.14 (s, 1H), 7.84 (s, 1H), 7.36 (d,  $J$  = 8.1 Hz, 1H), 7.29 – 7.26 (m, 1H), 7.23 (t,  $J$  = 7.5 Hz, 2H), 7.20 – 7.15 (m, 3H), 7.04 – 6.99 (m, 3H), 6.90 (t,  $J$  = 7.6 Hz, 2H), 6.87 – 6.81 (m, 6H), 6.75 (d,  $J$  = 4.1 Hz, 2H), 6.58 – 6.56 (m, 1H), 6.52 – 6.49 (m, 2H), 5.36 (d,  $J$  = 16.6 Hz, 1H), 5.29 (d,  $J$  = 16.6 Hz, 1H), 4.23 (d,  $J$  = 15.9 Hz, 1H), 4.14 (d,  $J$  = 15.9 Hz, 1H), 4.04 – 3.97 (m, 2H), 1.05 (t,  $J$  = 7.0 Hz, 3H).  $^{13}C$  NMR (176 MHz, Chloroform-*d*)  $\delta$  167.99, 157.89, 156.55, 140.999, 139.87, 138.60, 136.95, 136.06, 132.64, 131.06, 130.07, 128.97 (d,  $J$  = 11.9 Hz), 128.27, 127.70, 127.20, 127.19, 126.91, 126.61, 126.51, 126.40, 125.80, 125.38, 125.26, 124.99, 127.73, 121.95, 121.67, 118.61, 111.85 (d,  $J$  = 4.4 Hz), 111.34, 110.16 (d,  $J$  = 9.5 Hz), 109.73 (d,  $J$  = 26.4 Hz), 109.48, 103.80 (d,  $J$  = 23.5 Hz), 59.89, 47.12, 34.58, 12.96. HRMS (ESI-TOF)  $m/z$ :  $[M+Na]^+$  Calcd for  $C_{43}H_{33}FN_2NaO_2^+$  651.2418, found 651.2427.

**ethyl 3-benzyl-4-(1-benzyl-5-methyl-2-phenyl-1*H*-indol-3-yl)-9*H*-carbazole-2-carboxylate (3m)**

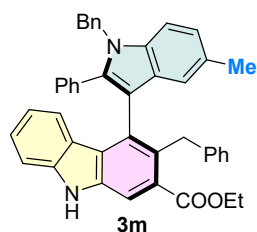

The residue was purified by a silica gel flash chromatography (PE/EA = 5/1) giving the product **3m** as a white solid in 87% yield (54.5 mg), m.p. 106-108 °C.  $^1H$  NMR (700 MHz, Chloroform-*d*)  $\delta$  8.10 (s, 1H), 7.82 (s, 1H), 7.32 (d,  $J$  = 8.1 Hz, 1H), 7.25 (t,  $J$  = 7.6 Hz, 1H), 7.21 (t,  $J$  = 7.2 Hz, 2H), 7.19 – 7.14 (m, 3H), 7.02 (d,  $J$  = 7.6 Hz, 2H), 6.98 (t,  $J$  = 7.2 Hz, 1H), 6.92 (d,  $J$  = 8.4 Hz, 1H), 6.84 (t,  $J$  = 7.8 Hz, 2H), 6.82 (d,  $J$  = 6.4 Hz, 5H), 6.77 – 6.73 (m, 2H), 6.49 (d,  $J$  = 4.8 Hz, 2H), 5.33 (d,  $J$  = 16.5 Hz, 1H), 5.28 (d,  $J$  = 16.5 Hz, 1H), 4.30 (d,  $J$  = 15.9 Hz, 1H), 4.15 (d,  $J$  = 16.0 Hz, 1H), 4.02 – 3.94 (m, 2H), 2.15 (s, 3H), 1.03 (t,  $J$  = 7.2 Hz, 3H).

$^{13}\text{C}$  NMR (176 MHz, Chloroform-*d*)  $\delta$  169.2, 142.2, 140.9, 138.4, 138.0, 137.1, 135.7, 132.2, 131.5, 131.0, 129.9, 129.9, 129.4, 128.6, 128.6, 128.3, 128.1, 127.6, 127.5, 127.2, 127.1, 126.4, 126.3, 124.6, 124.0, 123.2, 123.0, 119.8, 119.6, 112.4, 112.2, 110.4, 110.1, 60.9, 47.9, 35.7, 21.3, 14.0. HRMS (ESI-TOF)  $m/z$ :  $[\text{M}+\text{Na}]^+$  Calcd for  $\text{C}_{43}\text{H}_{36}\text{N}_2\text{NaO}_2^+$  647.2669, found 647.2670.

**ethyl 3-benzyl-4-(1-benzyl-5-nitro-2-phenyl-1*H*-indol-3-yl)-9*H*-carbazole-2-carboxylate (3n)**

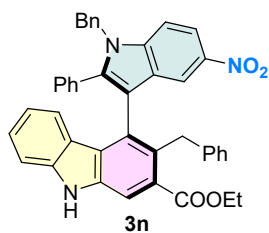

The residue was purified by a silica gel flash chromatography (PE/EA = 5/1) giving the product **3n** as a white solid in 89% yield (58.5 mg), m.p. 114-116 °C.  $^1\text{H}$  NMR (700 MHz, Chloroform-*d*)  $\delta$  8.24 (s, 1H), 7.93 (d,  $J = 17.3$  Hz, 2H), 7.70 (s, 1H), 7.37 (s, 1H), 7.30 – 7.20 (m, 5H), 7.19 (s, 1H), 7.09 (s, 1H),

7.02 – 6.88 (m, 6H), 6.82 – 6.69 (m, 4H), 6.62 (s, 1H), 6.52 (s, 2H), 5.43 (d,  $J = 14.9$  Hz, 1H), 5.35 (d,  $J = 14.4$  Hz, 1H), 4.22 (d,  $J = 14.6$  Hz, 1H), 4.13 – 4.02 (m, 3H), 1.13 – 1.07 (m, 3H).  $^{13}\text{C}$  NMR (176 MHz, Chloroform-*d*)  $\delta$  168.8, 142.1, 141.7, 141.1, 140.9, 139.9, 137.2, 137.0, 132.14, 130.2, 130.0, 129.6, 129.0, 128.6, 128.5, 128.1, 127.9, 127.7, 127.6, 127.0, 126.7, 126.3, 124.9, 122.6, 122.2, 119.7, 118.0, 117.2, 115.31, 112.9, 110.8, 110.4, 61.1, 48.4, 35.9, 14.1. HRMS (ESI-TOF)  $m/z$ :  $[\text{M}+\text{Na}]^+$  Calcd for  $\text{C}_{43}\text{H}_{33}\text{N}_3\text{NaO}_4^+$  678.2363, found 678.2372.

**ethyl 3-benzyl-4-(1-benzyl-5-cyano-2-phenyl-1*H*-indol-3-yl)-9*H*-carbazole-2-carboxylate (3o)**

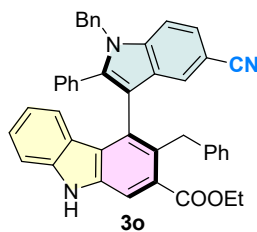

The residue was purified by a silica gel flash chromatography (PE/EA = 5/1) giving the product **3o** as a white solid in 91% yield (58.1 mg), m.p. 132-134 °C.  $^1\text{H}$  NMR (700 MHz, Chloroform-*d*)  $\delta$  8.22 (s, 1H), 7.90 (s, 1H), 7.38 (d,  $J = 8.1$  Hz, 1H), 7.30 – 7.27 (m, 3H), 7.25 – 7.22 (m, 2H), 7.19 (s, 1H), 7.14 (s, 1H), 7.08 (t,

$J = 7.1$  Hz, 1H), 6.99 (d,  $J = 7.4$  Hz, 2H), 6.94 (t,  $J = 7.7$  Hz, 2H), 6.89 (d,  $J = 7.9$  Hz, 2H), 6.83 (d,  $J = 5.2$  Hz, 3H), 6.73 (t,  $J = 7.5$  Hz, 1H), 6.61 (d,  $J = 8.0$  Hz, 1H), 6.52 – 6.48 (m, 2H), 5.40 (d,  $J = 16.5$  Hz, 1H), 5.34 (d,  $J = 16.5$  Hz, 1H), 4.18 (d,  $J = 15.8$  Hz, 1H), 4.10 – 4.03 (m, 3H), 1.09 (t,  $J = 7.1$  Hz, 3H).  $^{13}\text{C}$  NMR (176 MHz, Chloroform-*d*)

$\delta$  168.8, 141.7, 141.0, 140.1, 138.6, 137.2, 137.1, 132.1, 130.3, 130.0, 129.7, 128.9, 128.9, 128.5, 128.5, 128.1, 128.1, 127.8, 127.6, 126.8, 126.7, 126.3, 125.5, 125.3, 125.0, 122.6, 122.2, 120.4, 119.7, 113.7, 112.7, 111.3, 110.8, 103.3, 61.1, 48.2, 35.7, 14.1. HRMS (ESI-TOF)  $m/z$ :  $[M+Na]^+$  Calcd for  $C_{44}H_{33}N_3NaO_2^+$  658.2465, found 658.2471.

**ethyl 3-benzyl-4-(1-benzyl-6-chloro-2-phenyl-1H-indol-3-yl)-9H-carbazole-2-carboxylate (3p)**

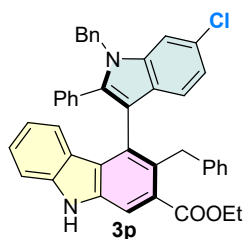

The residue was purified by a silica gel flash chromatography (PE/EA = 5/1) giving the product **3p** as a white solid in 87% yield (56.2 mg), m.p. 104-106 °C.  $^1H$  NMR (700 MHz, Chloroform-*d*)  $\delta$  8.14 (s, 1H), 7.83 (s, 1H), 7.35 (d,  $J = 8.1$  Hz, 1H), 7.27 (d,  $J = 7.7$  Hz, 1H), 7.23 (t,  $J = 7.4$  Hz, 2H), 7.21 – 7.17 (m, 2H), 7.04 –

6.98 (m, 3H), 6.90 – 6.86 (m, 3H), 6.85 – 6.80 (m, 6H), 6.76 (t,  $J = 7.5$  Hz, 1H), 6.73 (d,  $J = 7.9$  Hz, 1H), 6.51 – 6.48 (m, 2H), 5.33 (d,  $J = 16.6$  Hz, 1H), 5.26 (d,  $J = 16.6$  Hz, 1H), 4.23 (d,  $J = 15.9$  Hz, 1H), 4.11 (d,  $J = 15.9$  Hz, 1H), 4.03 – 3.94 (m, 2H), 1.03 (t,  $J = 7.1$  Hz, 3H).  $^{13}C$  NMR (176 MHz, Chloroform-*d*)  $\delta$  169.0, 142.0, 140.9, 138.7, 137.7, 137.6, 137.1, 132.0, 130.9, 130.0, 129.9, 129.8, 128.8, 128.2, 128.2, 128.2, 128.0, 127.6, 127.5, 126.9, 126.9, 126.5, 126.3, 124.8, 122.9, 122.7, 121.1, 121.0, 119.7, 113.0, 112.4, 110.5, 110.5, 60.9, 48.0, 35.6, 14.0. HRMS (ESI-TOF)  $m/z$ :  $[M+Na]^+$  Calcd for  $C_{43}H_{33}ClN_2NaO_2^+$  667.2123, found 667.2124.

**ethyl 3-benzyl-4-(1-benzyl-6-bromo-2-phenyl-1H-indol-3-yl)-9H-carbazole-2-carboxylate (3q)**

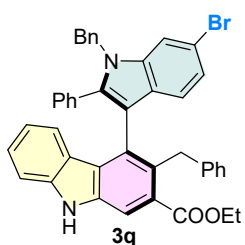

The residue was purified by a silica gel flash chromatography (PE/EA = 5/1) giving the product **3q** as a white solid in 97% yield (66.7 mg), m.p. 110-112 °C.  $^1H$  NMR (700 MHz, Chloroform-*d*)  $\delta$  8.14 (s, 1H), 7.83 (s, 1H), 7.43 (s, 1H), 7.34 (s, 1H), 7.30 – 7.15 (m, 5H), 6.98 (d,  $J = 31.0$  Hz, 4H), 6.85 (d,  $J = 30.0$  Hz, 8H), 6.74

(d,  $J = 21.7$  Hz, 2H), 6.49 (s, 2H), 5.33 (d,  $J = 16.2$  Hz, 1H), 5.26 (d,  $J = 13.5$  Hz, 1H), 4.23 (d,  $J = 15.7$  Hz, 1H), 4.11 (d,  $J = 15.6$  Hz, 1H), 4.04 – 3.93 (m, 2H), 1.03 (s, 3H).  $^{13}C$  NMR (176 MHz, Chloroform-*d*)  $\delta$  169.0, 142.0, 140.9, 138.7, 138.0, 137.7, 137.1,

132.0, 130.9, 123.0, 129.9, 129.8, 128.8, 128.2, 128.0, 127.6, 127.5, 127.2, 126.9, 126.5, 126.3, 124.8, 123.7, 122.9, 122.7, 121.3, 119.7, 116.0, 113.4, 113.1, 112.4, 110.6, 61.0, 48.0, 35.6, 14.0. HRMS (ESI-TOF)  $m/z$ :  $[M+Na]^+$  Calcd for  $C_{43}H_{33}BrN_2NaO_2^+$  711.1618, found 711.1620.

**ethyl 3-benzyl-4-(1-benzyl-6-methyl-2-phenyl-1*H*-indol-3-yl)-9*H*-carbazole-2-carboxylate (3r)**

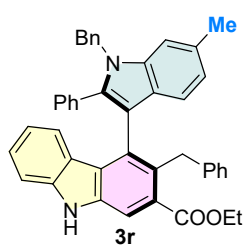

The residue was purified by a silica gel flash chromatography (PE/EA = 5/1) giving the product **3r** as a white solid in 89% yield (55.6 mg), m.p. 126-128 °C.  $^1H$  NMR (600 MHz, Chloroform-*d*)  $\delta$  8.17 (s, 1H), 7.87 (s, 1H), 7.40 (d,  $J$  = 8.1 Hz, 1H), 7.33 – 7.27 (m, 3H), 7.24 (d,  $J$  = 7.3 Hz, 1H), 7.15 (s, 1H), 7.10 (d,  $J$  = 7.3 Hz, 2H), 7.05 (t,  $J$  = 7.2 Hz, 1H), 6.99 (d,  $J$  = 8.0 Hz, 1H), 6.94 – 6.87 (m, 8H), 6.81 (t,  $J$  = 8.3 Hz, 2H), 6.59 – 6.54 (m, 2H), 5.40 (d,  $J$  = 16.6 Hz, 1H), 5.35 (d,  $J$  = 16.6 Hz, 1H), 4.38 (d,  $J$  = 16.0 Hz, 1H), 4.19 (d,  $J$  = 16.0 Hz, 1H), 4.07 – 3.97 (m, 2H), 2.43 (s, 3H), 1.08 (t,  $J$  = 7.1 Hz, 3H).  $^{13}C$  NMR (151 MHz, Chloroform-*d*)  $\delta$  169.1, 142.3, 140.8, 138.4, 137.7, 137.4, 137.0, 132.2, 132.0, 131.5, 130.8, 129.9, 129.9, 128.6, 128.3, 128.0, 127.5, 127.2, 126.9, 126.3, 126.3, 126.2, 124.6, 123.2, 122.9, 122.1, 119.7, 119.6, 112.7, 112.2, 110.4, 110.4, 60.8, 47.7, 35.6, 22.0, 14.0. HRMS (ESI-TOF)  $m/z$ :  $[M+Na]^+$  Calcd for  $C_{43}H_{36}N_2NaO_2^+$  647.2669, found 647.2678.

**ethyl 4-(1-benzyl-2-phenyl-1*H*-indol-3-yl)-3-(2-chlorobenzyl)-9*H*-carbazole-2-carboxylate (3s)**

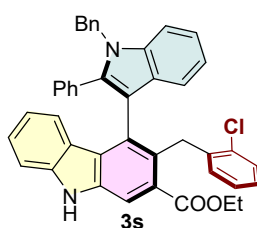

The residue was purified by a silica gel flash chromatography (PE/EA = 5/1) giving the product **3s** as a white solid in 97% yield (62.8 mg), m.p. 121-123 °C.  $^1H$  NMR (700 MHz, Chloroform-*d*)  $\delta$  8.30 (s, 1H), 8.05 (s, 1H), 7.42 (d,  $J$  = 8.1 Hz, 1H), 7.33 (t,  $J$  = 7.5 Hz, 1H), 7.31 – 7.27 (m, 3H), 7.24 (d,  $J$  = 7.5 Hz, 1H), 7.14 (t,  $J$  = 7.6 Hz, 1H), 7.11 (d,  $J$  = 7.9 Hz, 1H), 7.06 (d,  $J$  = 7.5 Hz, 2H), 7.03 – 6.99 (m, 2H), 6.93 – 6.85 (m, 5H), 6.85 – 6.79 (m, 3H), 6.57 (t,  $J$  = 7.6 Hz, 1H), 6.11 (d,  $J$  = 7.8 Hz, 1H), 5.43 (d,  $J$  = 16.7 Hz, 1H), 5.37 (d,  $J$  = 16.7 Hz, 1H), 4.46 (d,  $J$  = 17.1 Hz, 1H), 4.20 (d,  $J$  = 17.1 Hz, 1H), 4.10 – 4.01 (m, 2H), 1.05 (t,  $J$  = 7.1 Hz, 3H).  $^{13}C$  NMR (176

MHz, Chloroform-*d*)  $\delta$  168.8, 141.0, 139.9, 138.2, 137.8, 137.3, 137.1, 133.2, 131.3, 131.2, 130.6, 129.7, 129.5, 128.8, 128.7, 128.2, 128.1, 128.1, 127.7, 127.5, 127.2, 126.5, 126.2, 126.2, 125.8, 123.0, 122.9, 122.3, 120.2, 120.0, 119.7, 112.8, 112.4, 110.5, 110.4, 61.0, 47.8, 33.8, 13.8. HRMS (ESI-TOF)  $m/z$ :  $[M+Na]^+$  Calcd for  $C_{43}H_{33}ClN_2NaO_2^+$  667.2123, found 667.2127.

**ethyl 4-(1-benzyl-2-phenyl-1*H*-indol-3-yl)-3-(3-chlorobenzyl)-9*H*-carbazole-2-carboxylate (3t)**

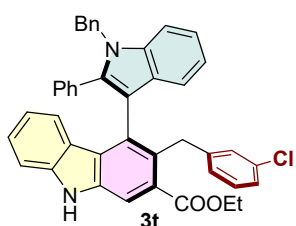

The residue was purified by a silica gel flash chromatography (PE/EA = 5/1) giving the product **3t** as a white solid in 92% yield (59.6 mg), m.p. 111-113 °C.  $^1H$  NMR (700 MHz, Chloroform-*d*)  $\delta$  8.16 (s, 1H), 7.87 (s, 1H), 7.32 (d,  $J$  = 8.1 Hz, 1H), 7.28 (d,  $J$  = 8.3 Hz, 1H), 7.23 (dt,  $J$  = 18.8, 7.4 Hz,

3H), 7.19 – 7.15 (m, 1H), 7.10 (t,  $J$  = 7.6 Hz, 1H), 7.00 (dd,  $J$  = 15.4, 7.5 Hz, 3H), 6.95 (d,  $J$  = 7.9 Hz, 1H), 6.89 – 6.83 (m, 3H), 6.82 – 6.77 (m, 3H), 6.76 (d,  $J$  = 7.9 Hz, 1H), 6.72 (t,  $J$  = 7.7 Hz, 2H), 6.46 (s, 1H), 6.37 (d,  $J$  = 7.7 Hz, 1H), 5.37 (d,  $J$  = 16.5 Hz, 1H), 5.31 (d,  $J$  = 16.5 Hz, 1H), 4.25 (d,  $J$  = 16.1 Hz, 1H), 4.11 (d,  $J$  = 16.1 Hz, 1H), 4.08 – 3.99 (m, 2H), 1.06 (t,  $J$  = 7.1 Hz, 3H).  $^{13}C$  NMR (176 MHz, Chloroform-*d*)  $\delta$  167.8, 143.3, 139.9, 137.2, 136.9, 136.2, 136.2, 132.3, 130.09, 130.0, 129.8, 128.7, 128.4, 127.7, 127.6, 127.2, 127.1, 127.1, 126.9, 126.3, 126.2, 125.4, 125.3, 125.3, 123.9, 122.0, 121.8, 121.4, 119.29, 118.9, 118.7, 111.6, 111.5, 109.5, 109.4, 59.9, 46.9, 34.4, 13.0. HRMS (ESI-TOF)  $m/z$ :  $[M+Na]^+$  Calcd for  $C_{43}H_{33}ClN_2NaO_2^+$  667.2123, found 667.2125.

**ethyl 4-(1-benzyl-2-phenyl-1*H*-indol-3-yl)-3-(3-methylbenzyl)-9*H*-carbazole-2-carboxylate (3u)**

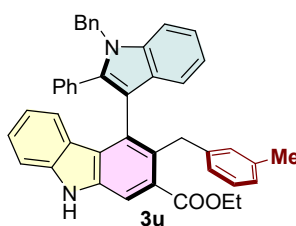

The residue was purified by a silica gel flash chromatography (PE/EA = 5/1) giving the product **3u** as a white solid in 87% yield (54.2 mg), m.p. 109-111 °C.  $^1H$  NMR (700 MHz, Chloroform-*d*)  $\delta$  8.19 (s, 1H), 7.86 (s, 1H), 7.38 (d,  $J$  = 8.1 Hz, 1H), 7.34 (d,  $J$  = 8.3 Hz, 1H), 7.32 – 7.26 (m, 3H), 7.24

(d,  $J$  = 7.1 Hz, 1H), 7.17 (t,  $J$  = 7.6 Hz, 1H), 7.10 (d,  $J$  = 7.5 Hz, 2H), 7.08 – 7.04 (m,

2H), 6.98 – 6.91 (m, 5H), 6.84 (d,  $J = 8.0$  Hz, 1H), 6.82 – 6.78 (m, 2H), 6.71 (d,  $J = 7.5$  Hz, 1H), 6.41 (d,  $J = 7.7$  Hz, 1H), 6.38 (s, 1H), 5.43 (d,  $J = 16.6$  Hz, 1H), 5.38 (d,  $J = 16.6$  Hz, 1H), 4.30 (d,  $J = 15.9$  Hz, 1H), 4.18 (d,  $J = 15.9$  Hz, 1H), 4.10 – 4.00 (m, 2H), 2.02 (s, 3H), 1.11 (t,  $J = 7.1$  Hz, 3H).  $^{13}\text{C}$  NMR (176 MHz, Chloroform-*d*)  $\delta$  169.2, 142.0, 140.9, 138.3, 138.0, 137.2, 137.0, 136.8, 132.1, 131.3, 130.6, 130.0, 129.9, 129.1, 128.7, 128.4, 128.0, 127.7, 127.4, 127.3, 126.9, 126.3, 126.2, 125.5, 125.5, 123.1, 122.8, 122.4, 120.2, 120.1, 119.6, 112.9, 112.1, 110.5, 110.4, 60.9, 47.9, 35.5, 21.3, 14.0. HRMS (ESI-TOF)  $m/z$ :  $[\text{M}+\text{Na}]^+$  Calcd for  $\text{C}_{43}\text{H}_{36}\text{N}_2\text{NaO}_2^+$  647.2669, found 647.2673.

**ethyl 4-(1-benzyl-2-phenyl-1*H*-indol-3-yl)-3-(4-fluorobenzyl)-9*H*-carbazole-2-carboxylate (3v)**

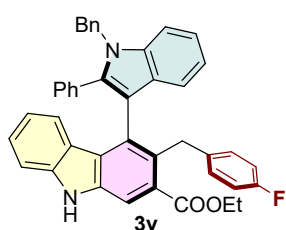

The residue was purified by a silica gel flash chromatography (PE/EA = 5/1) giving the product **3v** as a white solid in 92% yield (58.1 mg), m.p. 117-119 °C.  $^1\text{H}$  NMR (700 MHz, Chloroform-*d*)  $\delta$  8.23 (s, 1H), 7.91 (s, 1H), 7.38 (dd,  $J = 11.8$ , 8.2 Hz, 2H), 7.31 (ddd,  $J = 8.2$ , 7.0, 1.3 Hz, 1H), 7.29 – 7.26

(m, 2H), 7.26 – 7.22 (m, 1H), 7.18 (t,  $J = 7.7$  Hz, 1H), 7.10 – 7.05 (m, 3H), 7.03 (d,  $J = 7.9$  Hz, 1H), 6.96 – 6.92 (m, 3H), 6.90 – 6.87 (m, 2H), 6.82 (d,  $J = 7.7$  Hz, 1H), 6.79 (t,  $J = 7.5$  Hz, 1H), 6.54 (t,  $J = 8.8$  Hz, 2H), 6.46 (dd,  $J = 8.5$ , 5.6 Hz, 2H), 5.45 (d,  $J = 16.5$  Hz, 1H), 5.39 (d,  $J = 16.5$  Hz, 1H), 4.31 (d,  $J = 15.8$  Hz, 1H), 4.13 (d,  $J = 15.8$  Hz, 1H), 4.12 – 4.04 (m, 2H), 1.13 (t,  $J = 7.1$  Hz, 3H).  $^{13}\text{C}$  NMR (176 MHz, Chloroform-*d*)  $\delta$  169.0, 160.5 (d,  $J = 241.7$  Hz), 140.9, 138.2, 137.9, 137.8 (d,  $J = 2.9$  Hz), 137.2, 137.1, 131.9, 131.3, 130.6, 129.8, 129.6, 129.4, 129.4, 128.7, 128.3, 128.1, 127.7, 127.3, 127.2, 126.4, 126.4, 123.0, 122.8, 122.5, 120.3, 120.0, 119.7, 114.1 (d,  $J = 21.1$  Hz), 112.8, 112.4, 110.5 (d,  $J = 10.1$  Hz), 60.9, 47.9, 34.8, 14.0. HRMS (ESI-TOF)  $m/z$ :  $[\text{M}+\text{Na}]^+$  Calcd for  $\text{C}_{43}\text{H}_{33}\text{FN}_2\text{NaO}_2^+$  651.2418, found 651.2427.

**ethyl 4-(1-benzyl-2-phenyl-1*H*-indol-3-yl)-3-(4-methylbenzyl)-9*H*-carbazole-2-carboxylate (3w)**

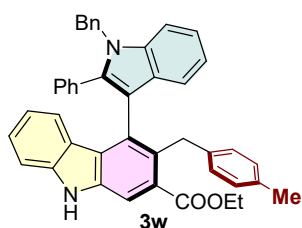

The residue was purified by a silica gel flash chromatography (PE/EA = 5/1) giving the product **3w** as a white solid in 85%

yield (53.3 mg), m.p. 125-127 °C. <sup>1</sup>H NMR (700 MHz, Chloroform-*d*) δ 8.18 (s, 1H), 7.85 (s, 1H), 7.38 (d, *J* = 8.1 Hz, 1H), 7.35 (d, *J* = 8.3 Hz, 1H), 7.33 – 7.26 (m, 3H), 7.24 (d, *J* = 7.2 Hz, 1H), 7.17 (t, *J* = 7.6 Hz, 1H), 7.12 – 7.05 (m, 4H), 6.97 – 6.89 (m, 5H), 6.83 (d, *J* = 7.9 Hz, 1H), 6.79 (t, *J* = 7.5 Hz, 1H), 6.70 (d, *J* = 7.8 Hz, 2H), 6.46 (d, *J* = 7.7 Hz, 2H), 5.44 (d, *J* = 16.6 Hz, 1H), 5.39 (d, *J* = 16.6 Hz, 1H), 4.31 (d, *J* = 15.8 Hz, 1H), 4.14 (d, *J* = 15.8 Hz, 1H), 4.10 – 4.00 (m, 2H), 2.15 (s, 3H), 1.12 (t, *J* = 7.1 Hz, 3H). <sup>13</sup>C NMR (176 MHz, Chloroform-*d*) δ 169.2, 140.8, 139.1, 138.3, 138.0, 137.2, 137.0, 133.9, 132.4, 131.4, 130.5, 130.0, 129.9, 128.7, 128.4, 128.2, 128.2, 128.0, 127.64, 127.3, 126.8, 126.4, 126.2, 123.1, 122.8, 122.3, 120.2, 120.1, 119.5, 112.9, 112.1, 110.5, 110.4, 60.9, 47.9, 35.2, 20.8, 14.0. HRMS (ESI-TOF) *m/z*: [M+Na]<sup>+</sup> Calcd for C<sub>43</sub>H<sub>36</sub>N<sub>2</sub>NaO<sub>2</sub><sup>+</sup> 647.2669, found 647.2679.

**ethyl 4-(1-benzyl-2-phenyl-1*H*-indol-3-yl)-3-(4-methoxybenzyl)-9*H*-carbazole-2-carboxylate (3x)**

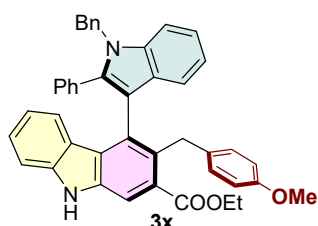

The residue was purified by a silica gel flash chromatography (PE/EA = 5/1) giving the product **3x** as a white solid in 68% yield (43.3 mg), m.p. 122-124 °C. <sup>1</sup>H NMR (600 MHz, Chloroform-*d*) δ 8.20 (d, *J* = 5.9 Hz, 1H), 7.86 (s, 1H), 7.39 (d, *J* = 8.1 Hz, 1H), 7.36 (d, *J* = 8.3 Hz, 1H), 7.33 – 7.26 (m, 3H), 7.25 (d, *J* = 7.9 Hz, 2H), 7.18 (t, *J* = 7.6 Hz, 1H), 7.12 – 7.05 (m, 4H), 6.98 – 6.91 (m, 5H), 6.83 (d, *J* = 8.0 Hz, 1H), 6.79 (t, *J* = 7.5 Hz, 1H), 6.49 – 6.42 (m, 4H), 5.45 (d, *J* = 16.5 Hz, 1H), 5.39 (d, *J* = 16.6 Hz, 1H), 4.27 (d, *J* = 15.7 Hz, 1H), 4.14 – 4.02 (m, 3H), 3.65 (s, 3H), 1.14 (t, *J* = 7.1 Hz, 3H). <sup>13</sup>C NMR (151 MHz, Chloroform-*d*) δ 169.2, 156.9, 140.9, 138.3, 138.0, 137.2, 137.0, 134.4, 132.5, 131.4, 130.5, 130.0, 129.9, 129.2, 128.7, 128.4, 128.1, 127.7, 127.3, 126.9, 126.4, 126.3, 123.1, 122.8, 122.4, 120.3, 120.1, 119.6, 113.0, 112.9, 112.1, 110.5, 110.4, 60.9, 55.2, 47.9, 34.7, 14.0. HRMS (ESI-TOF) *m/z*: [M+Na]<sup>+</sup> Calcd for C<sub>44</sub>H<sub>36</sub>N<sub>2</sub>NaO<sub>3</sub><sup>+</sup> 663.2618, found 663.2625.

**ethyl 4-(1-benzyl-2-phenyl-1*H*-indol-3-yl)-3-(thiophen-3-ylmethyl)-9*H*-carbazole-2-carboxylate (3y)**

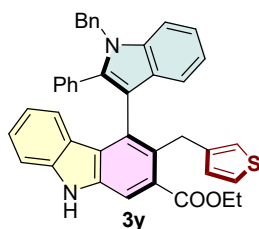

The residue was purified by a silica gel flash chromatography (PE/EA = 5/1) giving the product **3y** as a white solid in 95% yield (58.7 mg), m.p. 104-106 °C. <sup>1</sup>H NMR (700 MHz, Chloroform-*d*) δ 8.12 (s, 1H), 7.80 (s, 1H), 7.30 (dd, *J* = 8.2, 4.7 Hz, 2H), 7.25 – 7.19 (m, 3H), 7.18 – 7.15 (m, 1H), 7.12 (t, *J* = 7.7 Hz, 1H), 7.03 (d, *J* = 7.6 Hz, 2H), 7.01 – 6.97 (m, 2H), 6.91 – 6.83 (m, 6H), 6.76 (d, *J* = 8.0 Hz, 1H), 6.72 (t, *J* = 7.5 Hz, 1H), 6.38 (d, *J* = 5.0 Hz, 1H), 6.07 – 6.04 (m, 1H), 5.38 (d, *J* = 16.5 Hz, 1H), 5.33 (d, *J* = 16.5 Hz, 1H), 4.27 (d, *J* = 15.7 Hz, 1H), 4.11 – 4.01 (m, 3H), 1.10 (t, *J* = 7.4 Hz, 3H). <sup>13</sup>C NMR (176 MHz, Chloroform-*d*) δ 168.2, 141.7, 139.8, 137.2, 137.1, 136.2, 136.0, 131.1, 130.3, 129.0, 128.8, 128.5, 127.6, 127.4, 127.3, 127.1, 126.7, 126.3, 125.8, 125.3, 125.3, 122.8, 122.1, 121.8, 121.4, 119.3, 119.2, 119.0, 118.5, 111.8, 111.3, 109.5, 109.4, 59.9, 46.9, 29.8, 13.0. HRMS (ESI-TOF) *m/z*: [M+Na]<sup>+</sup> Calcd for C<sub>41</sub>H<sub>32</sub>N<sub>2</sub>NaO<sub>2</sub>S<sup>+</sup> 639.2077, found 639.2078.

**ethyl 4-(1-benzyl-2-phenyl-1*H*-indol-3-yl)-3-(cyclopropylmethyl)-9*H*-carbazole-2-carboxylate (3z)**

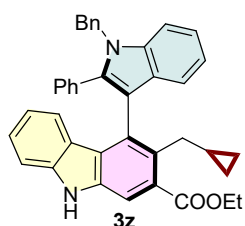

The residue was purified by a silica gel flash chromatography (PE/EA = 5/1) giving the product **3z** as a colorless oil in 44% yield (25.0 mg). <sup>1</sup>H NMR (600 MHz, Chloroform-*d*) δ 8.10 (s, 1H), 7.87 (s, 1H), 7.39 (d, *J* = 8.3 Hz, 1H), 7.34 (d, *J* = 8.1 Hz, 1H), 7.32 – 7.27 (m, 3H), 7.26 – 7.23 (m, 1H), 7.22 – 7.18 (m, 1H), 7.14 – 7.09 (m, 5H), 7.09 – 7.06 (m, 1H), 7.02 (t, *J* = 7.4 Hz, 2H), 6.98 (t, *J* = 7.2 Hz, 1H), 6.76 (d, *J* = 4.0 Hz, 2H), 5.53 (d, *J* = 16.6 Hz, 1H), 5.46 (d, *J* = 16.6 Hz, 1H), 4.38 (d, *J* = 7.1 Hz, 1H), 4.36 (d, *J* = 7.1 Hz, 1H), 2.99 (dd, *J* = 13.9, 5.7 Hz, 1H), 2.67 (dd, *J* = 13.9, 7.4 Hz, 1H), 1.40 (t, *J* = 7.1 Hz, 3H), 0.59 (qq, *J* = 7.9, 5.2 Hz, 1H), 0.18 – 0.10 (m, 1H), 0.07 – 0.00 (m, 1H), -0.11 – -0.18 (m, 1H), -0.27 – -0.33 (m, 1H). <sup>13</sup>C NMR (151 MHz, Chloroform-*d*) δ 169.8, 140.9, 138.4, 137.6, 137.3, 136.8, 134.5, 131.6, 129.8, 129.5, 129.0, 128.9, 128.7, 128.1, 127.8, 127.3, 126.8, 126.3, 126.2, 123.1, 122.9, 122.4, 120.4, 120.3, 119.4, 113.4, 112.1, 110.5, 110.3, 61.0, 48.0, 33.7, 14.3,



12.8, 5.3, 4.7. HRMS (ESI-TOF)  $m/z$ :  $[M+Na]^+$  Calcd for  $C_{40}H_{34}N_2NaO_2^+$  597.2512, found 597.2520.

**ethyl 4-(1-benzyl-2-phenyl-1*H*-indol-3-yl)-3-pentyl-9*H*-carbazole-2-carboxylate (3aa)**

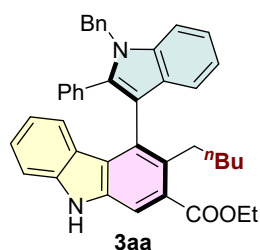

The residue was purified by a silica gel flash chromatography (PE/EA = 5/1) giving the product **3aa** as a colorless oil in 78% yield (46.1 mg).  $^1H$  NMR (600 MHz, Chloroform-*d*)  $\delta$  8.12 (s, 1H), 7.92 (s, 1H), 7.39 (d,  $J = 2.7$  Hz, 1H), 7.37 (d,  $J = 2.9$  Hz, 1H), 7.33 – 7.28 (m, 3H), 7.28 – 7.24 (m, 2H), 7.22 – 7.18 (m, 1H), 7.13 (d,  $J = 7.2$  Hz, 2H), 7.12 – 7.09 (m, 3H), 7.07 – 7.02 (m, 3H), 6.97 (t,  $J = 7.4$  Hz, 1H), 6.80 – 6.75 (m, 2H), 5.55 (d,  $J = 16.7$  Hz, 1H), 5.48 (d,  $J = 16.7$  Hz, 1H), 4.37 (qd,  $J = 7.1, 1.6$  Hz, 2H), 2.83 (td,  $J = 11.9, 11.1, 4.7$  Hz, 1H), 2.76 – 2.66 (m, 1H), 1.39 (t,  $J = 7.1$  Hz, 3H), 1.22 – 1.13 (m, 1H), 1.09 – 0.95 (m, 5H), 0.66 (t,  $J = 6.7$  Hz, 3H).  $^{13}C$  NMR (151 MHz, Chloroform-*d*)  $\delta$  169.3, 141.0, 138.4, 137.4, 137.3, 136.6, 135.6, 131.7, 129.7, 129.4, 128.7, 128.5, 128.2, 127.8, 127.3, 127.2, 126.3, 126.2, 123.1, 122.9, 122.4, 120.2, 119.5, 113.2, 112.3, 110.4, 110.3, 60.9, 48.0, 32.6, 31.6, 30.6, 22.2, 14.3, 14.0. HRMS (ESI-TOF)  $m/z$ :  $[M+Na]^+$  Calcd for  $C_{41}H_{38}N_2NaO_2^+$  613.2825, found 613.2825.

**ethyl 3-benzyl-4-(1-benzyl-2-(2-chlorophenyl)-1*H*-indol-3-yl)-9*H*-carbazole-2-carboxylate (3ab)**

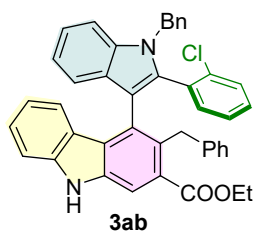

The residue was purified by a silica gel flash chromatography (PE/EA = 5/1) giving the product **3ab** as a white solid in 84% yield (54.5 mg), m.p. 126-128 °C.  $^1H$  NMR (600 MHz, Chloroform-*d*)  $\delta$  8.16 (s, 1H), 7.77 (s, 1H), 7.36 (d,  $J = 9.0$  Hz, 2H), 7.26 (t,  $J = 7.2$  Hz, 1H), 7.18 (s, 1H), 7.14 – 7.08 (m, 5H), 6.98 (d,  $J = 7.9$  Hz, 3H), 6.84 (dt,  $J = 14.4, 7.3$  Hz, 4H), 6.71 (q,  $J = 8.1, 7.3$  Hz, 2H), 6.66 (q,  $J = 8.2$  Hz, 1H), 6.60 (d,  $J = 7.9$  Hz, 1H), 6.43 (d,  $J = 6.6$  Hz, 2H), 5.41 (d,  $J = 16.2$  Hz, 1H), 5.10 (d,  $J = 16.2$  Hz, 1H), 4.34 (d,  $J = 16.3$  Hz, 1H), 4.24 (d,  $J = 16.2$  Hz, 1H), 3.93 – 3.82 (m, 2H), 0.96 (t,  $J = 7.1$  Hz, 3H).  $^{13}C$  NMR (151 MHz, Chloroform-*d*)  $\delta$  169.2, 142.7, 138.2, 136.9, 136.7, 135.0, 134.7, 132.9, 132.4, 130.7, 130.1, 130.0,

129.8, 129.7, 128.5, 128.4, 128.1, 127.4, 127.4, 126.8, 126.7, 126.3, 126.3, 124.5, 123.1, 122.8, 122.6, 120.3, 120.1, 119.6, 113.7, 112.4, 110.6, 110.5, 60.9, 48.2, 35.6, 13.9. HRMS (ESI-TOF)  $m/z$ :  $[M+Na]^+$  Calcd for  $C_{43}H_{33}ClN_2NaO_2^+$  667.2123, found 667.2128.

**ethyl 3-benzyl-4-(1-benzyl-2-(4-fluorophenyl)-1H-indol-3-yl)-9H-carbazole-2-carboxylate (3ac)**

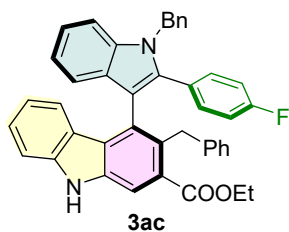

The residue was purified by a silica gel flash chromatography (PE/EA = 5/1) giving the product **3ac** as a white solid in 98% yield (61.3 mg), m.p. 102-104 °C.  $^1H$  NMR (700 MHz, Chloroform- $d$ )  $\delta$  8.16 (s, 1H), 7.85 (s, 1H), 7.33 (d,  $J$  = 8.1 Hz, 1H), 7.30 (d,  $J$  = 8.3 Hz, 1H), 7.26 – 7.23 (m, 1H), 7.23 – 7.20

(m, 2H), 7.19 – 7.16 (m, 2H), 7.15 – 7.11 (m, 1H), 7.03 (d,  $J$  = 7.9 Hz, 1H), 7.00 (d,  $J$  = 7.8 Hz, 2H), 6.91 (t,  $J$  = 7.5 Hz, 1H), 6.86 – 6.82 (m, 3H), 6.74 – 6.69 (m, 4H), 6.54 – 6.47 (m, 4H), 5.32 (d,  $J$  = 16.6 Hz, 1H), 5.29 (d,  $J$  = 16.6 Hz, 1H), 4.34 (d,  $J$  = 16.0 Hz, 1H), 4.10 (d,  $J$  = 16.0 Hz, 1H), 4.04 – 3.95 (m, 2H), 1.03 (t,  $J$  = 7.1 Hz, 3H).  $^{13}C$  NMR (176 MHz, Chloroform- $d$ )  $\delta$  169.1, 163.0, 161.6, 142.1, 140.9, 138.1, 137.2, 137.1, 137.0, 131.9, 131.6 (d,  $J$  = 8.2 Hz), 130.4, 130.0, 128.7, 128.2, 128.1, 127.6, 127.4, 127.3 (d,  $J$  = 3.2 Hz), 126.9, 126.4, 126.3, 124.8, 123.0, 122.7, 122.6, 120.4, 120.1, 119.7, 115.1 (d,  $J$  = 21.5 Hz), 113.1, 112.4, 110.5, 110.5, 61.0, 47.8, 35.6, 14.0. HRMS (ESI-TOF)  $m/z$ :  $[M+Na]^+$  Calcd for  $C_{43}H_{33}FN_2NaO_2^+$  651.2418, found 651.2424.

**ethyl 3-benzyl-4-(1-benzyl-2-(p-tolyl)-1H-indol-3-yl)-9H-carbazole-2-carboxylate (3ad)**

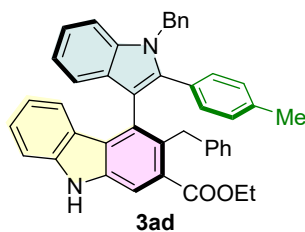

The residue was purified by a silica gel flash chromatography (PE/EA = 5/1) giving the product **3ad** as a white solid in 99% yield (62.1 mg), m.p. 114-116 °C.  $^1H$  NMR (700 MHz, Chloroform- $d$ )  $\delta$  8.12 (s, 1H), 7.80 (s, 1H), 7.32 (d,  $J$  = 8.1 Hz, 1H), 7.27 – 7.23 (m, 2H), 7.23 – 7.20 (m, 2H), 7.18 – 7.15 (m, 1H), 7.09 (t,  $J$  = 7.6

Hz, 1H), 7.04 (d,  $J$  = 7.6 Hz, 2H), 6.99 (d,  $J$  = 7.9 Hz, 1H), 6.87 (t,  $J$  = 7.5 Hz, 1H), 6.83 (d,  $J$  = 4.8 Hz, 3H), 6.77 – 6.71 (m, 4H), 6.67 (d,  $J$  = 7.7 Hz, 2H), 6.50 (d,  $J$  = 4.4 Hz, 2H), 5.37 (d,  $J$  = 16.6 Hz, 1H),

5.30 (d,  $J = 16.6$  Hz, 1H), 4.28 (d,  $J = 16.0$  Hz, 1H), 4.13 (d,  $J = 16.0$  Hz, 1H), 4.01 – 3.91 (m, 2H), 2.09 (s, 3H), 1.02 (t,  $J = 7.1$  Hz, 3H).  $^{13}\text{C}$  NMR (176 MHz, Chloroform- $d$ )  $\delta$  169.2, 142.3, 140.9, 138.4, 138.2, 137.5, 137.1, 137.1, 132.0, 130.8, 130.0, 129.8, 128.9, 128.7, 128.5, 128.4, 128.3, 127.4, 127.3, 126.9, 126.4, 126.3, 124.6, 123.2, 122.9, 122.2, 120.2, 120.0, 119.6, 112.6, 112.2, 110.5, 110.4, 60.9, 47.9, 35.6, 21.2, 14.0. HRMS (ESI-TOF)  $m/z$ :  $[\text{M}+\text{Na}]^+$  Calcd for  $\text{C}_{43}\text{H}_{36}\text{N}_2\text{NaO}_2^+$  647.2669, found 647.2666.

**ethyl 3-benzyl-4-(1-benzyl-2-(4-ethylphenyl)-1H-indol-3-yl)-9H-carbazole-2-carboxylate (3ae)**

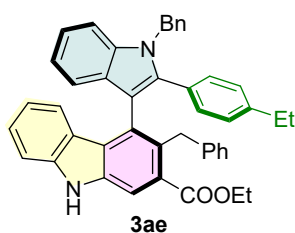

The residue was purified by a silica gel flash chromatography (PE/EA = 5/1) giving the product **3ae** as a white solid in 92% yield (58.5 mg), m.p. 112-114 °C.  $^1\text{H}$  NMR (700 MHz, Chloroform- $d$ )  $\delta$  8.11 (s, 1H), 7.81 (s, 1H), 7.33 (d,  $J = 8.2$  Hz, 1H), 7.27 – 7.24 (m, 2H), 7.24 – 7.20 (m, 2H), 7.17 (t,  $J = 7.3$  Hz, 1H), 7.09 (t,  $J = 7.7$  Hz, 1H), 7.04 (d,  $J = 7.3$  Hz, 2H), 6.99 (d,  $J = 7.9$  Hz, 1H), 6.87 (t,  $J = 7.2$  Hz, 1H), 6.82 (dd,  $J = 5.2, 1.9$  Hz, 3H), 6.77 (d,  $J = 8.2$  Hz, 3H), 6.74 – 6.69 (m, 3H), 6.50 – 6.46 (m, 2H), 5.38 (d,  $J = 16.6$  Hz, 1H), 5.31 (d,  $J = 16.6$  Hz, 1H), 4.28 (d,  $J = 16.0$  Hz, 1H), 4.13 (d,  $J = 16.0$  Hz, 1H), 4.01 – 3.91 (m, 2H), 2.40 (q,  $J = 7.6$  Hz, 2H), 1.05 – 1.01 (m, 6H).  $^{13}\text{C}$  NMR (176 MHz, Chloroform- $d$ )  $\delta$  169.2, 143.6, 142.3, 140.9, 138.4, 138.2, 137.1, 137.1, 132.1, 130.9, 130.0, 129.8, 128.7, 128.6, 128.5, 128.3, 127.7, 127.5, 127.2, 127.0, 126.4, 126.3, 124.6, 123.2, 122.9, 122.2, 120.2, 120.0, 119.6, 112.5, 112.1, 110.5, 110.4, 60.9, 47.9, 35.6, 28.5, 15.1, 14.0. HRMS (ESI-TOF)  $m/z$ :  $[\text{M}+\text{Na}]^+$  Calcd for  $\text{C}_{45}\text{H}_{38}\text{N}_2\text{NaO}_2^+$  661.2825, found 661.2835.

**ethyl 3-benzyl-4-(1-benzyl-2-(4-methoxyphenyl)-1H-indol-3-yl)-9H-carbazole-2-carboxylate (3af)**

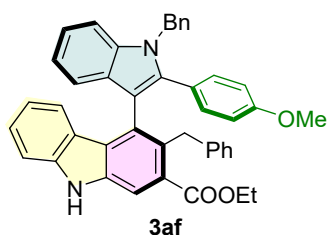

The residue was purified by a silica gel flash chromatography (PE/EA = 5/1) giving the product **3af** as a white solid in 47% yield (30.2 mg), m.p. 111-113 °C.  $^1\text{H}$  NMR (600 MHz, Chloroform- $d$ )  $\delta$  8.11 (s, 1H), 7.83 (s, 1H), 7.35 (d,  $J = 8.0$  Hz, 1H), 7.28 – 7.24 (m, 2H), 7.23 – 7.20 (m, 2H), 7.18 – 7.16 (m, 1H), 7.09 (t,  $J = 7.6$  Hz, 1H), 7.03 (d,  $J = 7.2$  Hz, 2H),

7.00 (d,  $J = 7.9$  Hz, 1H), 6.88 (t,  $J = 7.5$  Hz, 1H), 6.85 – 6.83 (m, 3H), 6.76 – 6.72 (m, 4H), 6.52 – 6.49 (m, 2H), 6.41 – 6.38 (m, 2H), 5.36 (d,  $J = 16.6$  Hz, 1H), 5.30 (d,  $J = 16.6$  Hz, 1H), 4.31 (d,  $J = 16.0$  Hz, 1H), 4.13 (d,  $J = 16.0$  Hz, 1H), 4.03 – 3.92 (m, 2H), 3.58 (s, 3H), 1.03 (t,  $J = 7.1$  Hz, 3H).  $^{13}\text{C}$  NMR (151 MHz, Chloroform- $d$ )  $\delta$  169.2, 159.1, 142.3, 140.9, 138.4, 138.0, 137.1, 132.0, 131.1, 130.9, 130.0, 128.8, 128.7, 128.4, 128.3, 127.5, 127.3, 127.0, 126.3, 126.3, 124.7, 123.7, 123.2, 122.9, 122.2, 120.2, 119.9, 119.6, 113.6, 112.4, 112.1, 110.40, 60.9, 55.0, 47.8, 35.6, 14.0. HRMS (ESI-TOF)  $m/z$ :  $[\text{M}+\text{Na}]^+$  Calcd for  $\text{C}_{44}\text{H}_{36}\text{N}_2\text{NaO}_3^+$  663.2618, found 663.2628.

**ethyl 3-benzyl-4-(1-benzyl-2-(thiophen-3-yl)-1H-indol-3-yl)-9H-carbazole-2-carboxylate (3ag)**

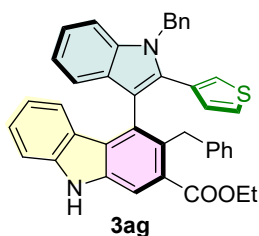

The residue was purified by a silica gel flash chromatography (PE/EA = 5/1) giving the product **3ag** as a white solid in 54% yield (33.5 mg), m.p. 90-92 °C.  $^1\text{H}$  NMR (600 MHz, Chloroform- $d$ )  $\delta$  8.14 (s, 1H), 7.88 (s, 1H), 7.34 (d,  $J = 8.1$  Hz, 1H), 7.28 – 7.23 (m, 4H), 7.20 (d,  $J = 7.2$  Hz, 1H), 7.12 (t,  $J = 7.6$  Hz, 1H), 7.07 – 7.03 (m, 3H), 6.91 (t,  $J = 7.4$  Hz, 1H), 6.86 – 6.81 (m, 4H), 6.77 (d,  $J = 7.9$  Hz, 1H), 6.72 (t,  $J = 7.5$  Hz, 1H), 6.57 – 6.54 (m, 1H), 6.53 – 6.49 (m, 2H), 6.46 – 6.42 (m, 1H), 5.42 (d,  $J = 16.7$  Hz, 1H), 5.37 (d,  $J = 16.9$  Hz, 1H), 4.36 (d,  $J = 15.9$  Hz, 1H), 4.11 – 4.00 (m, 3H), 1.07 (t,  $J = 7.1$  Hz, 3H).  $^{13}\text{C}$  NMR (151 MHz, Chloroform- $d$ )  $\delta$  169.1, 142.2, 140.9, 138.3, 137.2, 137.1, 133.3, 132.2, 131.4, 130.8, 130.0, 128.8, 128.4, 128.2, 128.1, 127.6, 127.3, 127.0, 126.4, 126.2, 125.0, 125.0, 124.7, 123.1, 122.8, 122.5, 120.3, 120.0, 119.7, 112.8, 112.3, 110.5, 110.2, 61.0, 47.9, 35.6, 14.0. HRMS (ESI-TOF)  $m/z$ :  $[\text{M}+\text{Na}]^+$  Calcd for  $\text{C}_{41}\text{H}_{32}\text{N}_2\text{NaO}_2\text{S}^+$  639.2077, found 639.2084.

**ethyl 3-benzyl-4-(1-methyl-2-phenyl-1H-indol-3-yl)-9H-carbazole-2-carboxylate (3ah)**

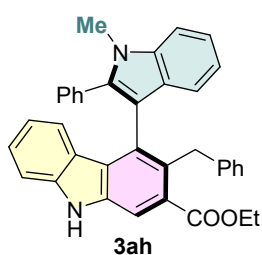

The residue was purified by a silica gel flash chromatography (PE/EA = 5/1) giving the product **3ah** as a white solid in 97% yield (51.6 mg), m.p. 115-117 °C.  $^1\text{H}$  NMR (600 MHz, Chloroform- $d$ )  $\delta$  8.19 (s, 1H), 7.86 (s, 1H), 7.48 (d,  $J = 8.2$  Hz,

1H), 7.38 (d,  $J = 8.0$  Hz, 1H), 7.33 – 7.26 (m, 2H), 7.14 – 7.06 (m, 2H), 7.04 – 6.96 (m, 5H), 6.91 – 6.87 (m, 3H), 6.85 – 6.78 (m, 2H), 6.57 – 6.52 (m, 2H), 4.32 (d,  $J = 16.0$  Hz, 1H), 4.15 (d,  $J = 16.0$  Hz, 1H), 4.07 – 3.95 (m, 2H), 3.81 (s, 3H), 1.08 (t,  $J = 7.1$  Hz, 3H).  $^{13}\text{C}$  NMR (151 MHz, Chloroform- $d$ )  $\delta$  169.2, 142.3, 140.8, 137.9, 137.6, 137.0, 132.1, 131.5, 130.7, 130.0, 128.3, 128.0, 128.0, 127.6, 127.5, 126.9, 126.2, 124.6, 123.2, 122.8, 122.1, 120.0, 120.0, 119.6, 112.2, 112.0, 110.4, 109.4, 60.8, 35.5, 31.4, 14.0. HRMS (ESI-TOF)  $m/z$ :  $[\text{M}+\text{Na}]^+$  Calcd for  $\text{C}_{37}\text{H}_{30}\text{N}_2\text{NaO}_2^+$  557.2199, found 557.2206.

**ethyl 4-(1-allyl-2-phenyl-1H-indol-3-yl)-3-benzyl-9H-carbazole-2-carboxylate (3ai)**

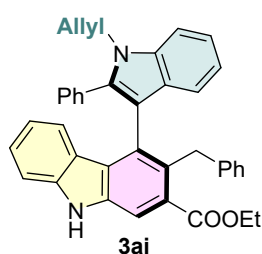

The residue was purified by a silica gel flash chromatography (PE/EA = 5/1) giving the product **3ai** as a white solid in 88% yield (49.6 mg), m.p. 106-108 °C.  $^1\text{H}$  NMR (700 MHz, Chloroform- $d$ )  $\delta$  8.11 (s, 1H), 7.78 (s, 1H), 7.36 (d,  $J = 8.3$  Hz, 1H), 7.29 (d,  $J = 8.1$  Hz, 1H), 7.24 – 7.20 (m, 1H), 7.18 – 7.14

(m, 1H), 7.04 – 6.99 (m, 2H), 6.95 – 6.87 (m, 5H), 6.85 – 6.81 (m, 3H), 6.77 – 6.73 (m, 2H), 6.51 (s, 2H), 5.97 – 5.89 (m, 1H), 5.16 (d,  $J = 10.4$  Hz, 1H), 5.01 (d,  $J = 17.2$  Hz, 1H), 4.71 (qd,  $J = 17.5, 4.3$  Hz, 2H), 4.27 (d,  $J = 16.0$  Hz, 1H), 4.12 (d,  $J = 15.9$  Hz, 1H), 4.01 – 3.91 (m, 2H), 1.02 (t,  $J = 7.1$  Hz, 3H).  $^{13}\text{C}$  NMR (176 MHz, Chloroform- $d$ )  $\delta$  168.2, 141.2, 139.8, 136.7, 136.0, 132.9, 131.0, 130.4, 129.7, 128.9, 128.8, 127.3, 127.2, 127.0, 126.7, 126.5, 125.8, 125.2, 123.7, 122.1, 121.7, 121.2, 119.1, 119.1, 118.5, 115.4, 111.4, 111.2, 109.4, 109.2, 59.8, 45.6, 34.6, 12.9. HRMS (ESI-TOF)  $m/z$ :  $[\text{M}+\text{Na}]^+$  Calcd for  $\text{C}_{39}\text{H}_{32}\text{N}_2\text{NaO}_2^+$  583.2356, found 583.2353.

**3. Synthesis of Intermediate 3a'**

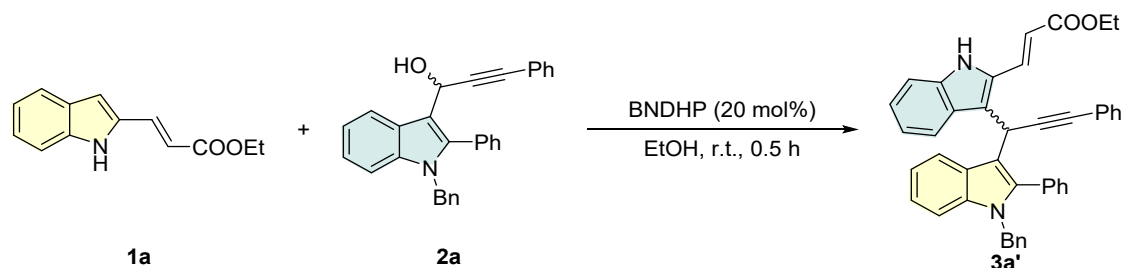

To a dry flask, absolute ethyl alcohol (1.0 mL) was added to a mixture of 2-indolyl acrylate **1a** (0.1 mmol), propargylic alcohol **2a** (0.1 mmol) and ( $\pm$ )-1,1'-binaphthyl-2,2'-diylhydrogenphosphate (BNDHP) (20 mol%). Then, the mixture was stirred at room temperature for 0.5 h. The reaction mixture was monitored by TLC, the solvent was evaporated under reduced pressure and the residue was purified by flash column chromatography to yield the intermediate **3a'** (58.1 mg, 95% yield).

**ethyl (*E*)-3-(3-(1-(1-benzyl-2-phenyl-1*H*-indol-3-yl)-3-phenylprop-2-yn-1-yl)-1*H*-indol-2-yl)acrylate (**3a'**)**

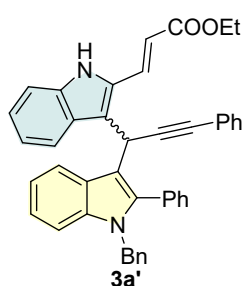

The residue was purified by a silica gel flash chromatography (PE/EA = 5/1) giving the product **3a'** as a white solid in 95% yield (58.1 mg), m.p. 127-129 °C. <sup>1</sup>H NMR (600 MHz, Chloroform-*d*)  $\delta$  8.13 (d,  $J$  = 16.2 Hz, 1H), 8.07 (s, 1H), 7.99 (d,  $J$  = 7.8 Hz, 1H), 7.54 (d,  $J$  = 7.8 Hz, 1H), 7.51 – 7.48 (m, 2H), 7.32 – 7.26 (m, 7H), 7.23 (d,  $J$  = 7.8 Hz, 1H), 7.18 (m, 5H), 7.13 (t,  $J$  = 8.4 Hz, 1H), 7.09 (t,  $J$  = 8.4 Hz, 1H), 6.93 – 6.89 (m, 3H), 6.01 (d,  $J$  = 16.2 Hz, 1H), 5.91 (s, 1H), 5.16 (s, 2H), 4.19 (m, 2H), 1.23 (t,  $J$  = 7.2 Hz, 3H). <sup>13</sup>C NMR (150 MHz, Chloroform-*d*)  $\delta$  166.6, 138.2, 138.1, 136.9, 136.7, 132.7, 131.7, 131.2, 130.8, 129.7, 128.6, 128.4, 128.1, 127.8, 127.1, 126.8, 126.0, 124.6, 123.8, 122.0, 121.2, 120.4, 120.3, 120.1, 120.0, 115.2, 112.4, 110.8, 110.4, 90.6, 83.2, 60.4, 47.4, 27.0, 14.3. HRMS (ESI-TOF)  $m/z$ :  $[M+Na]^+$  Calcd for C<sub>43</sub>H<sub>34</sub>N<sub>2</sub>NaO<sub>2</sub><sup>+</sup> 633.2512, found 633.2510.

#### 4. Screening of Catalysts for Atropselective Synthesis of Axially Chiral Carbazolyl-Indole **3a**

To screen the catalysts for atropselective synthesis of axially chiral carbazolyl-indole **3a**, the reaction was processed as below. To a dry flask, dry toluene (1.0 mL) was added to a mixture of 2-indolyl acrylate **1** (0.1 mmol), propargylic alcohol **2** (0.1 mmol) and corresponding chiral phosphoric acid (CPA) (10 mol%). Then, the mixture was stirred at room temperature for 0.5 h and monitored by TLC. After the consumption of **1a**, intermediate **3a'** was obtained by purified through flash column chromatography. The enantioselectivity ratio of intermediate **3a'** was determined by HPLC on a

Chiralpak AD-H column at 254 nm (n-hexane/2-propanol = 80/20, 1 mL/min).

After screening out the optimal chiral phosphoric acid (**CPA6**), the intermediate **3a'** (55 mg, 8:92 er), prepared by **CPA6**, was straightly used in next cyclization. Corresponding base (15.3mg, 1.1 equiv.) was added to the mixture of **3a'** in dry toluene (1.0 mL) and the mixture was stirred at corresponding temperature for 2 h or 12 h. The final product **3a** was obtained by purified through flash column chromatography. The enantiomeric excess value of carbazolyl-indole **3a** was determined by HPLC on a Chiralpak OD-H column at 254 nm (n-hexane/2-propanol = 90/10, 1 mL/min,  $t_{\text{major}} = 10.08$  min,  $t_{\text{minor}} = 12.59$  min).

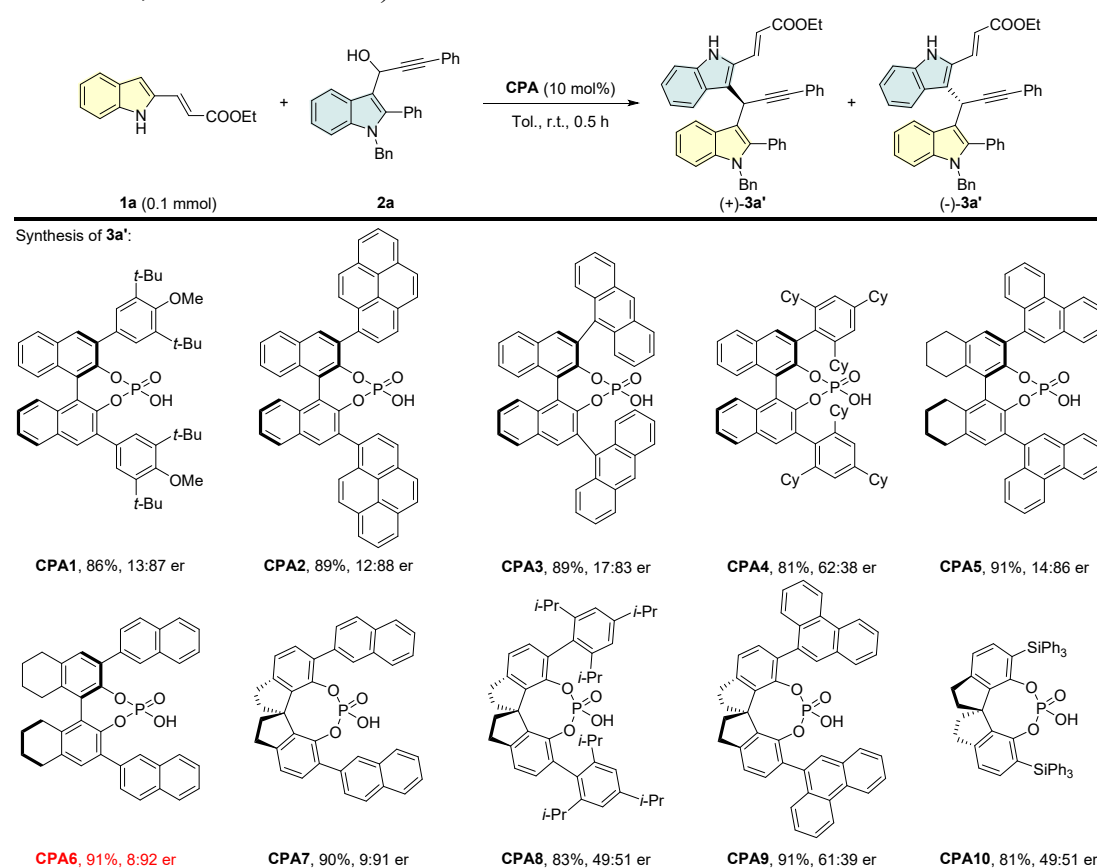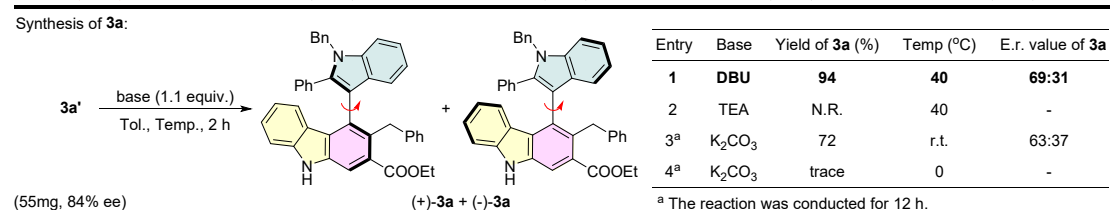

## 5. The Scale-Up Reaction

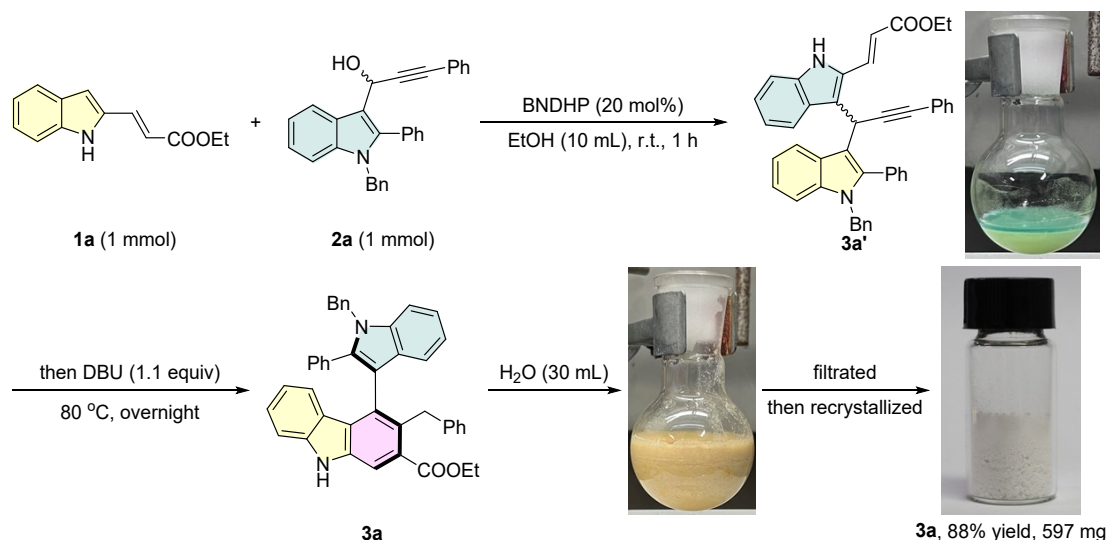

To a dry flask, absolute ethyl alcohol (10.0 mL) was added to a mixture of 2-indolyl acrylate **1a** (1 mmol), propargylic alcohol **2a** (1 mmol) and ( $\pm$ )-1,1'-binaphthyl-2,2'-diylhydrogenphosphate (BNDHP) (20 mol%). Then, the mixture was stirred at room temperature for 1 h. After 1 h, DBU (1.1 equiv.) was added to the mixture and the mixture continued to be stirred at 80 °C overnight and monitored by TLC. After completion of the reaction, deionized water (30 mL) was poured into the mixture, and the crude product **3a** precipitated. After filtration, the crude product was recrystallized by isopropanol and hexane to afford pure product **3a** (88% yield, 597 mg).

## 6. Synthetic Transformations of **3a**

### 6.1 Procedure for Synthesis of Compound **4**

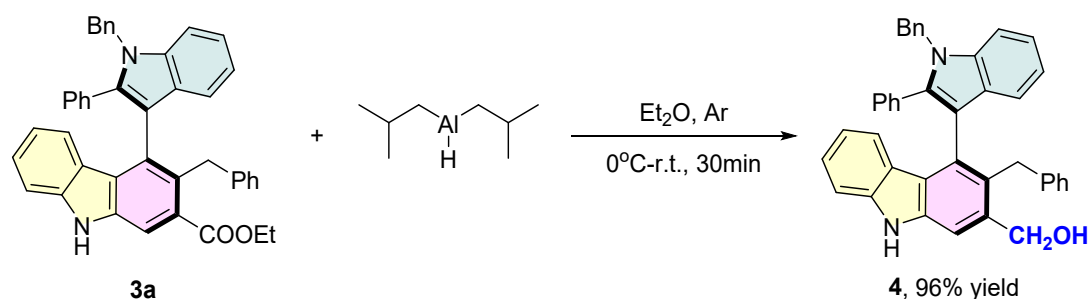

To a solution of **3a** (61.8 mg, 0.1 mmol) in absolute ethyl ether (2.0 mL), diisobutylaluminum hydride (2 mL, 1M in hexanes, 0.2 mmol) was added at 0 °C under argon atmosphere. Then, the mixture was stirred at room temperature for 0.5 h and monitored by TLC. After the consumption of **3a**, the mixture was quenched by 0.5 mL



deionized water. The solvent was removed in vacuo and the residue was purified by flash column chromatography on silica gel to give the final products **4** (54.8 mg, 96% yield) as a white solid.

### (3-benzyl-4-(1-benzyl-2-phenyl-1*H*-indol-3-yl)-9*H*-carbazol-2-yl)methanol

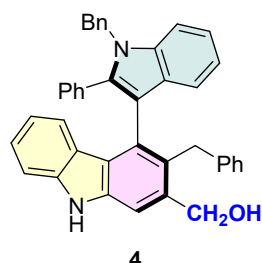

The residue was purified by a silica gel flash chromatography (PE/EA = 2/1) giving the product **4** as a white solid in 96% yield (54.8 mg), m.p. 128.6-130.8 °C. <sup>1</sup>H NMR (600 MHz, Chloroform-*d*) δ 8.08 (s, 1H), 7.53 (s, 1H), 7.37 (d, *J* = 8.4, 1H), 7.35 (d, *J* = 8.4, 1H), 7.30 – 7.25 (m, 3H), 7.25 – 7.21 (m, 2H), 7.17 (t, *J* = 7.2 Hz, 1H), 7.10 – 7.07 (m, 4H), 6.98 – 6.91 (m, 9H), 6.83 – 6.77 (m, 2H), 6.61 (d, *J* = 6.6 Hz, 2H), 5.46 (d, *J* = 16.8, 1H), 5.39 (d, *J* = 16.2, 1H), 4.56 (d, *J* = 13.2 Hz, 1H), 4.52 (d, *J* = 13.8 Hz, 1H), 4.03 (d, *J* = 16.8 Hz, 1H), 3.90 (d, *J* = 16.8 Hz, 1H). <sup>13</sup>C NMR (150 MHz, Chloroform-*d*) δ 141.8, 140.0, 138.3, 138.1, 137.9, 137.2, 131.6, 130.0, 129.8, 129.4, 128.6, 128.5, 128.2, 128.1, 127.9, 127.6, 127.3, 126.37, 125.2, 125.1, 123.9, 123.6, 122.3, 122.2, 120.2, 120.1, 119.3, 113.5, 110.5, 110.2, 109.8, 64.0, 47.9, 34.9. HRMS (ESI-TOF) *m/z*: [M+Na]<sup>+</sup>  
 Calcd for C<sub>41</sub>H<sub>32</sub>N<sub>2</sub>NaO<sup>+</sup> 591.2407, found 591.2412.

## 6.2 Procedure for Synthesis of Compound 5

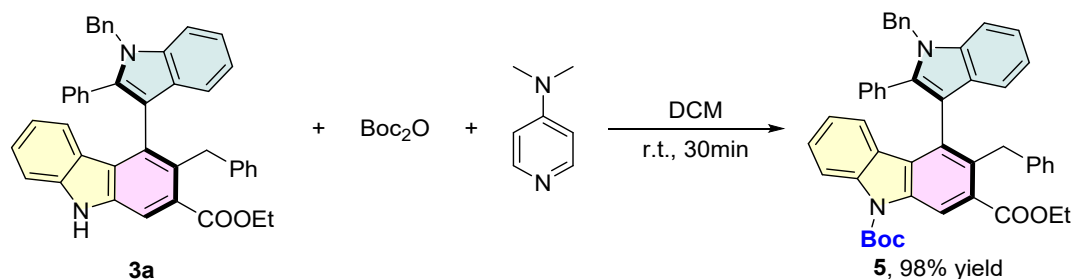

To a dry flask, di-tert-butyl dicarbonate (32.7 mg, 0.15 mmol) was added to a mixture of **3a** (61.1 mg, 0.10 mmol) and DMAP (1.2 mg, 0.01 mmol) in DCM (2 mL). Then, the mixture was stirred at room temperature for 0.5 h and monitored by TLC. After completion of the reaction, the solvent was removed in vacuo and the residue was purified by flash column chromatography on silica gel to give the final products **5** (70 mg, 98% yield) as a white solid.

### 9-(tert-butyl) 2-ethyl 3-benzyl-4-(1-benzyl-2-phenyl-1*H*-indol-3-yl)-9*H*-carbazole-

## 2,9-dicarboxylate

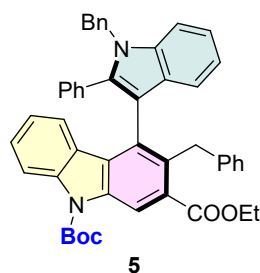

The residue was purified by a silica gel flash chromatography (PE/EA = 10/1) giving the product **5** as a white solid in 98% yield (70.0 mg), m.p. 127.6-129.9 °C. <sup>1</sup>H NMR (700 MHz, Chloroform-*d*) δ 8.80 (s, 1H), 8.37 (d, *J* = 8.4 Hz, 1H), 7.36 (m, 2H), 7.28 (t, *J* = 7.0 Hz, 2H), 7.25 – 7.23 (m, 1H), 7.18 (t, *J* = 7.7 Hz, 1H), 7.10 – 7.08 (m, 3H), 7.04 (d, *J* = 8.4 Hz, 1H), 6.98 – 6.94 (m, 3H), 6.92 – 6.86 (m, 6H), 6.76 (d, *J* = 7.7 Hz, 1H), 6.58 – 6.57 (m, 2H), 5.42 (d, *J* = 16.1 Hz, 1H), 5.37 (d, *J* = 16.8 Hz, 1H), 4.35 (d, *J* = 16.8 Hz, 1H), 4.19 (d, *J* = 15.4 Hz, 1H), 4.09 – 4.04 (m, 2H), 1.78 (s, 9H), 1.11 (t, *J* = 7.0 Hz, 3H). <sup>13</sup>C NMR (176 MHz, Chloroform-*d*) δ 168.7, 150.9, 141.5, 139.8, 138.1, 138.0, 137.2, 136.3, 136.2, 131.1, 130.8, 130.4, 129.8, 129.0, 128.7, 128.3, 128.2, 128.1, 127.8, 127.6, 127.4, 127.3, 126.3, 125.4, 128.8, 123.1, 122.6, 122.5, 120.4, 119.9, 117.5, 115.8, 112.1, 110.6, 84.2, 60.9, 47.9, 35.4, 28.4, 14.0. HRMS (ESI-TOF) *m/z*: [M+Na]<sup>+</sup> Calcd for C<sub>48</sub>H<sub>42</sub>N<sub>2</sub>NaO<sub>4</sub><sup>+</sup> 733.3037, found 733.3035.

## 6.3 Procedure for Synthesis of Compound 6

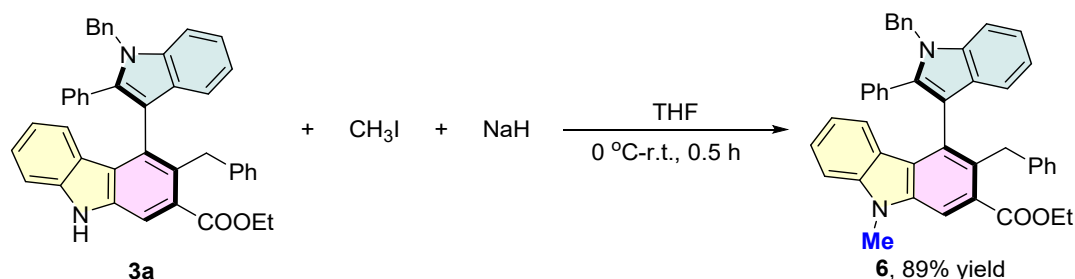

To a dry flask, **3a** (61.1 mg, 0.10 mmol) was dissolved in THF (1 mL) and then was added to a mixture of NaH (4.8 mg, 0.20 mmol) in THF (1 mL). Next, the mixture was stirred at 0 °C for 15 min. After 15 min, iodomethane (21.3 mg, 0.15 mmol) was added to mixture and the reaction continued to be stirred at room temperature for 0.5 h. After completion of the reaction, the solvent was removed in vacuo and the residue was purified by flash column chromatography on silica gel to give the final products **6** (55.1 mg, 89% yield) as a white solid.

ethyl 3-benzyl-4-(1-benzyl-2-phenyl-1H-indol-3-yl)-9-methyl-9H-carbazole-2-carboxylate

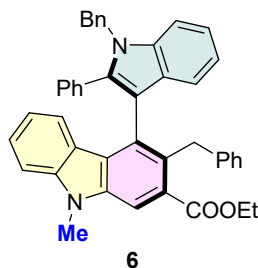

The residue was purified by a silica gel flash chromatography (PE/EA = 10/1) giving the product **6** as a white solid in 89% yield (55.1 mg), m.p. 119.2-121.6 °C. <sup>1</sup>H NMR (700 MHz, Chloroform-*d*) δ 7.86 (s, 1H), 7.38 (d, *J* = 4.2 Hz, 2H), 7.35 (d, *J* = 8.4 Hz, 1H), 7.28 (t, *J* = 7.7 Hz, 2H), 7.25 – 7.23 (m, 1H), 7.17 (t, *J* = 7.7 Hz, 1H), 7.10 (d, *J* = 7.7 Hz, 2H), 7.08 – 7.05 (m, 2H), 6.95 – 6.91 (m, 5H), 6.90 – 6.89 (m, 3H), 6.86 (d, *J* = 7.7 Hz, 1H), 6.81 – 6.79 (m, 1H), 6.57 (s, 2H), 5.44 (d, *J* = 16.8 Hz, 1H), 5.39 (d, *J* = 16.1 Hz, 1H), 4.36 (d, *J* = 16.1 Hz, 1H), 4.20 (d, *J* = 16.1 Hz, 1H), 4.10 – 4.01 (m, 2H), 3.91 (s, 3H), 1.10 (t, *J* = 7.0 Hz, 3H). <sup>13</sup>C NMR (176 MHz, Chloroform-*d*) δ 169.4, 142.3, 142.3, 138.6, 138.3, 138.0, 137.2, 131.4, 131.4, 130.6, 129.9, 129.8, 128.7, 128.4, 128.3, 128.1, 127.7, 127.5, 127.3, 126.4, 126.2, 126.1, 124.6, 122.9, 122.5, 122.4, 120.2, 120.1, 119.1, 112.9, 110.5, 110.1, 108.2, 60.9, 47.9, 35.6, 29.2, 14.0. HRMS (ESI-TOF) *m/z*: [M+Na]<sup>+</sup> Calcd for C<sub>44</sub>H<sub>36</sub>N<sub>2</sub>NaO<sub>2</sub><sup>+</sup> 647.2669, found 647.2665.

## 6.4 Thermal stability experiments

**3a** (1 mg, 60:40 er) dissolved in *m*-xylene (1.0 mL) for **3a**. The vial was fitted with a puncturable sealed cap and placed into an aluminum heating block. The experiment was performed at 80 °C. At given time, a small aliquot (one microliter) was removed from the vial and concentrated in an HPLC vial. The residue was dissolved in a 10% isopropanol/hexanes solution (1.0 mL) and injected into in the HPLC system, equipped with a Chiralpak OD-H column (n-hexane/2-propanol = 90/10, flow rate = 1 mL/min, 25 °C). The timepoints and corresponding enantiomeric excess of the entire system was plotted to determine an observed rate constant. The rotational barrier ( $\Delta G^{\ddagger}_{\text{ent}}$ ), rate constants for enantiomerization ( $k_{\text{ent}}$ ) and racemization ( $k_{\text{rac}}$ ), and half-life for racemization ( $t_{1/2\text{rac}}$ ) were calculated based on the following Eyring equations<sup>7</sup>:

$$t_{1/2\text{rac}} = \ln 2 / k_{\text{rac}}$$

$$\Delta G^{\ddagger}_{\text{ent}} = RT \ln(k_{\text{ent}} h / k_B T)$$

where the transmission coefficient  $\kappa$  is set as 1, Boltzmann constant  $k_B = 1.3806503 \times 10^{-23}$  J/K, Planck constant  $h = 6.62606876 \times 10^{-34}$  J·s, idea gas constant  $R = 8.314472$  J/(mol·K).

**Table S1.** Change of enantiomer ratio with time for **3a** (80 °C in *m*-Xylene)

| Time (s) | ee    | First order racemization<br>$\ln(ee_0/ee_t)$ |
|----------|-------|----------------------------------------------|
| 0        | 20    | 0                                            |
| 1800     | 17    | 0.162519                                     |
| 3600     | 14.39 | 0.328998                                     |
| 5400     | 12.17 | 0.496527                                     |
| 7200     | 10.22 | 0.671076                                     |
| 9000     | 8.82  | 0.819195                                     |
| 10800    | 7.64  | 0.962366                                     |
| 12600    | 6.3   | 1.15633                                      |
| 14400    | 5.35  | 1.319                                        |

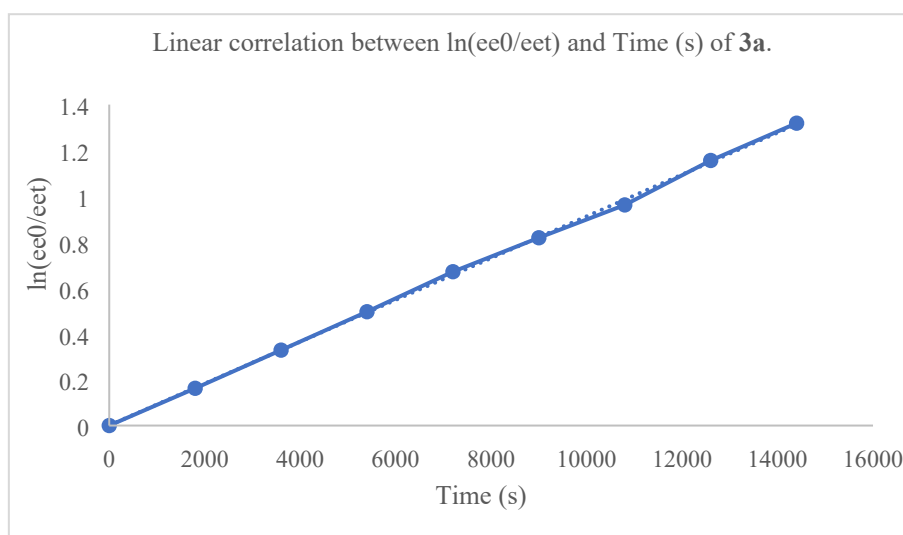

$$k_{racemization} (80\text{ }^{\circ}\text{C}) = 0.000091174418625\text{ s}^{-1}$$

$$k_{enantiomerization} (80\text{ }^{\circ}\text{C}) = 0.000045587209313\text{ s}^{-1}$$

Employing the Eyring equation:

$$\Delta G_{ent}^{\ddagger} = RT \ln\left(\frac{k_B \times T}{k_{ent} \times h}\right)$$

$$\Delta G_{ent}^{\ddagger} = 8.314\text{ J}\cdot\text{mol}^{-1} \times 353.15\text{ K} \times \ln\left(\frac{1.381 \times 10^{-23}\text{ J}\cdot\text{K}^{-1} \times 353.15\text{ K}}{4.55872 \times 10^{-5} \times 6.626 \times 10^{-34}\text{ J}\cdot\text{s}}\right)$$

$$\Delta G_{ent}^{\ddagger} = 116.34\text{ kJ}\cdot\text{mol}^{-1} = 27.830\text{ kcal}\cdot\text{mol}^{-1}$$

$$T_{1/2} = \frac{\ln 2}{k_{\text{racemization}}} = 2.11 \text{ h}$$

## 7. X-ray Crystal Structures of **3ah**

To a 5 mL tube containing **3ah** (20 mg) was added ethyl acetate (3 mL). A clear solution was obtained through ultrasound treatment and was kept at room temperature and **3ah** crystals were obtained after the solvent evaporated, which were characterized by single crystal X-ray diffraction. X-ray diffraction experiment was carried out on an Agilent D8 QUEST and the data obtained were deposited at the Cambridge Crystallographic Data Centre. The crystal structure was solved by Olex2 with the SHELXT structure solution program using Intrinsic Phasing and refined with the SHELXL refinement package using Least Squares minimisation. CCDC 2295497 (**3ah**) contains the supplementary crystallographic data for this paper. X-ray crystal structure of **3ah** with the ellipsoid contour at 50% probability levels.

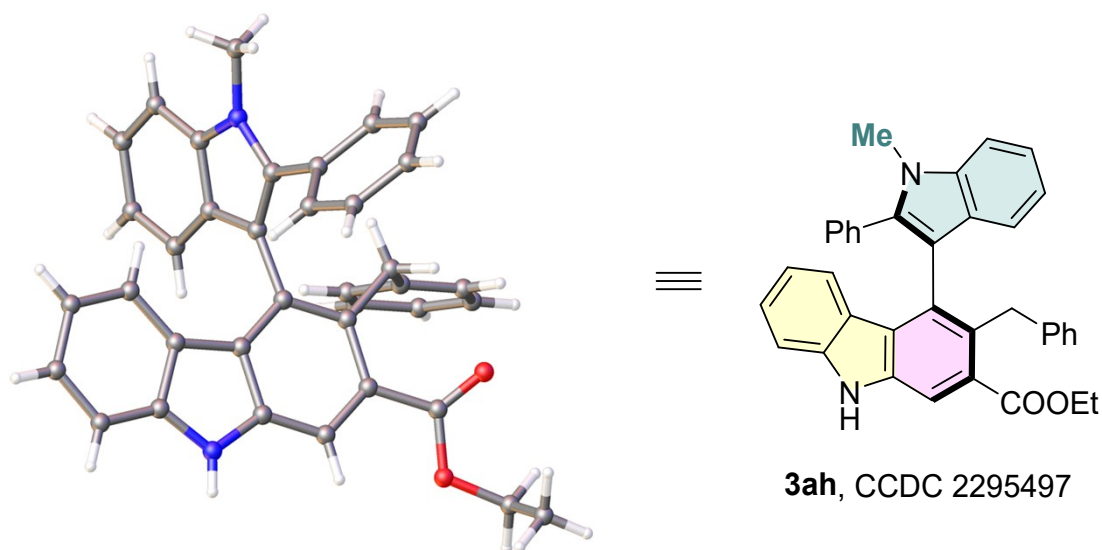

|                            |                                                               |
|----------------------------|---------------------------------------------------------------|
| <b>Identification code</b> | <b>3ah</b>                                                    |
| <b>Empirical formula</b>   | C <sub>37</sub> H <sub>30</sub> N <sub>2</sub> O <sub>2</sub> |
| <b>Formula weight</b>      | 534.63                                                        |
| <b>Temperature/K</b>       | 293.15                                                        |
| <b>Crystal system</b>      | monoclinic                                                    |
| <b>Space group</b>         | P 1 21/c 1                                                    |
| <b>a/Å</b>                 | 14.5252(4)                                                    |
| <b>b/Å</b>                 | 12.5893(3)                                                    |

|                                                         |                                                   |
|---------------------------------------------------------|---------------------------------------------------|
| <b>c/Å</b>                                              | 16.5370(5)                                        |
| <b><math>\alpha</math>/°</b>                            | 90                                                |
| <b><math>\beta</math>/°</b>                             | 107.271(2)                                        |
| <b><math>\gamma</math>/°</b>                            | 90                                                |
| <b>Volume/Å<sup>3</sup></b>                             | 2887.6 (14)                                       |
| <b>Z</b>                                                | 4                                                 |
| <b><math>\rho_{\text{calc}}/\text{cm}^3</math></b>      | 1.230                                             |
| <b><math>\mu/\text{mm}^{-1}</math></b>                  | 0.596                                             |
| <b>F(000)</b>                                           | 1128                                              |
| <b>2<math>\Theta</math> range for data collection/°</b> | 3.19 to 68.35                                     |
| <b>Index ranges</b>                                     | -17 ≤ h ≤ 15, -15 ≤ k ≤ 14, -19 ≤ l ≤ 19          |
| <b>Reflections collected</b>                            | 19415                                             |
| <b>Independent reflections</b>                          | 5212 [R <sub>int</sub> = 0.0672]                  |
| <b>Data/restraints/parameters</b>                       | 5212/0/376                                        |
| <b>Goodness-of-fit on F<sup>2</sup></b>                 | 1.198                                             |
| <b>Final R indexes [I ≥ 2<math>\sigma</math> (I)]</b>   | R <sub>1</sub> = 0.0627, wR <sub>2</sub> = 0.1399 |
| <b>Final R indexes [all data]</b>                       | R <sub>1</sub> = 0.1098, wR <sub>2</sub> = 0.1651 |
| <b>Largest diff. peak and hole / eÅ<sup>-3</sup></b>    | 0.364 and -0.221                                  |
| <b>R.M.S. deviation from mean / eÅ<sup>-3</sup></b>     | 0.041                                             |

## 8. HPLC Spectra for Screening of Catalysts

### 8.1 HPLC Spectra of Intermediate 3a'

**Racemic 3a'**: HPLC (Chiralpak AD-H column, n-hexane/2-propanol = 80/20, flow rate = 1 mL/min,  $\lambda = 254$  nm)  $t_R = 6.675$  min (minor), 9.190 min (major)

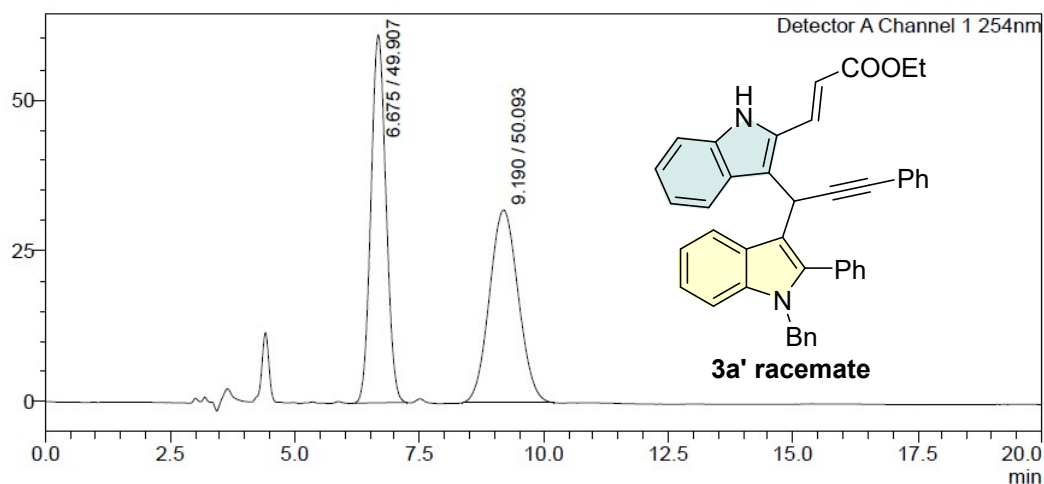

#### <Peak Table>

Detector A Channel 1 254nm

| Peak# | Ret. Time | Area    | Height | Conc.  | Unit | Mark | Name |
|-------|-----------|---------|--------|--------|------|------|------|
| 1     | 6.675     | 1283703 | 60994  | 49.907 |      | M    |      |
| 2     | 9.190     | 1288469 | 31942  | 50.093 |      | M    |      |
| Total |           | 2572172 | 92936  |        |      |      |      |

**CPA1**: HPLC (Chiralpak AD-H column, n-hexane/2-propanol = 80/20, flow rate = 1 mL/min,  $\lambda = 254$  nm)  $t_R = 6.653$  min (minor), 9.182 min (major)

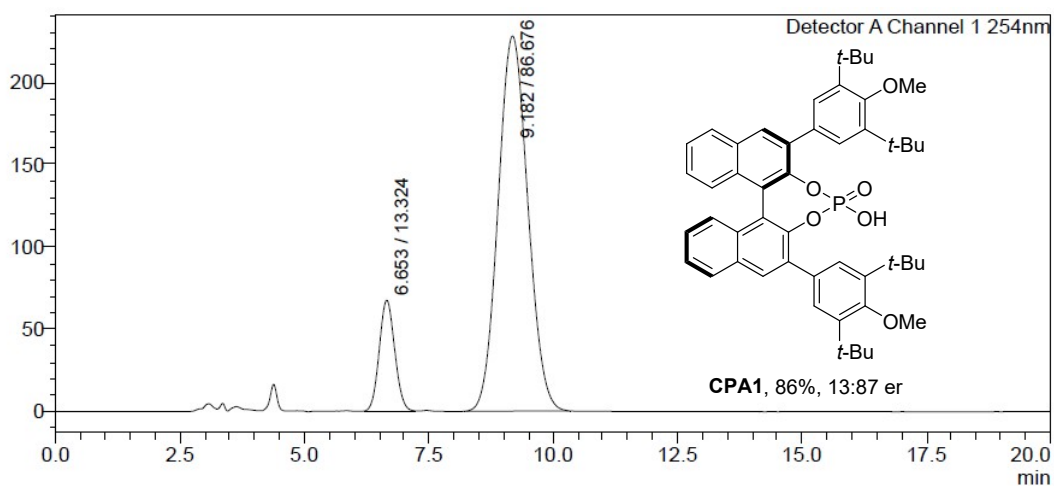

#### <Peak Table>

Detector A Channel 1 254nm

| Peak# | Ret. Time | Area     | Height | Conc.  | Unit | Mark | Name |
|-------|-----------|----------|--------|--------|------|------|------|
| 1     | 6.653     | 1452748  | 67235  | 13.324 |      | M    |      |
| 2     | 9.182     | 9450590  | 227687 | 86.676 |      | M    |      |
| Total |           | 10903338 | 294921 |        |      |      |      |

**CPA2:** HPLC (Chiralpak AD-H column, n-hexane/2-propanol = 80/20, flow rate = 1 mL/min,  $\lambda = 254$  nm)  $t_R = 6.684$  min (minor), 9.217 min (major)

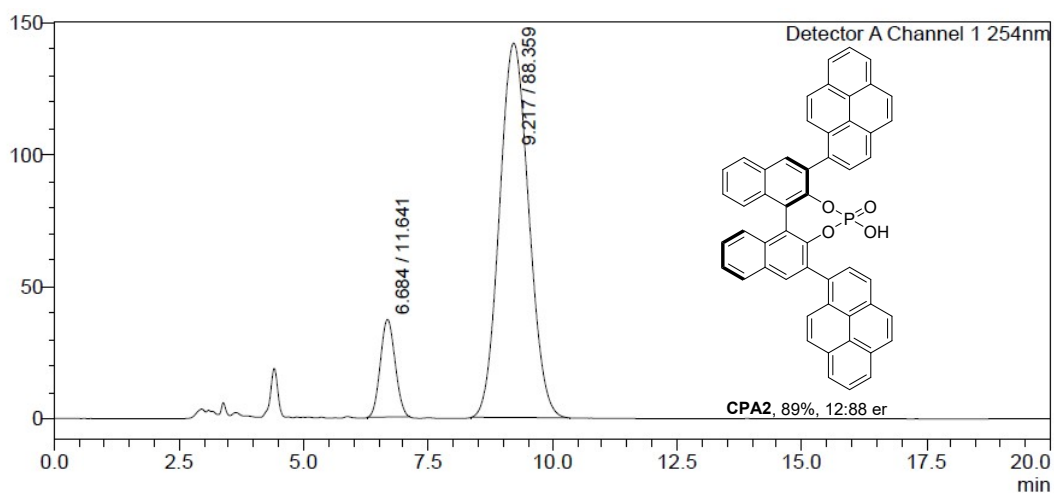

**<Peak Table>**

Detector A Channel 1 254nm

| Peak# | Ret. Time | Area    | Height | Conc.  | Unit | Mark | Name |
|-------|-----------|---------|--------|--------|------|------|------|
| 1     | 6.684     | 763748  | 37047  | 11.641 |      | M    |      |
| 2     | 9.217     | 5797274 | 141990 | 88.359 |      | M    |      |
| Total |           | 6561022 | 179037 |        |      |      |      |

**CPA3:** HPLC (Chiralpak AD-H column, n-hexane/2-propanol = 80/20, flow rate = 1 mL/min,  $\lambda = 254$  nm)  $t_R = 6.624$  min (minor), 9.131 min (major)

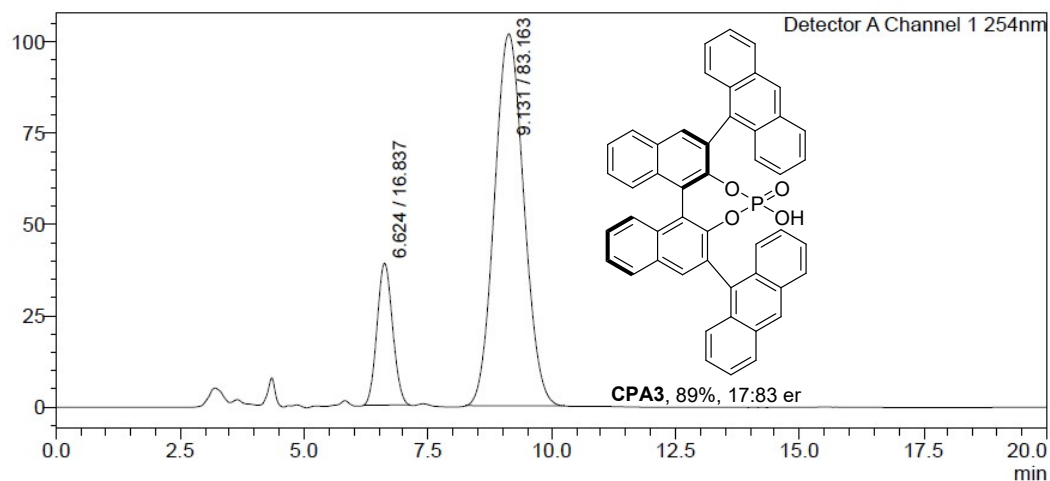

**<Peak Table>**

Detector A Channel 1 254nm

| Peak# | Ret. Time | Area    | Height | Conc.  | Unit | Mark | Name |
|-------|-----------|---------|--------|--------|------|------|------|
| 1     | 6.624     | 852332  | 38918  | 16.837 |      | M    |      |
| 2     | 9.131     | 4210052 | 101934 | 83.163 |      | M    |      |
| Total |           | 5062384 | 140852 |        |      |      |      |



**CPA4:** HPLC (Chiralpak AD-H column, n-hexane/2-propanol = 80/20, flow rate = 1 mL/min,  $\lambda = 254$  nm)  $t_R = 6.625$  min (major), 9.127 min (minor)

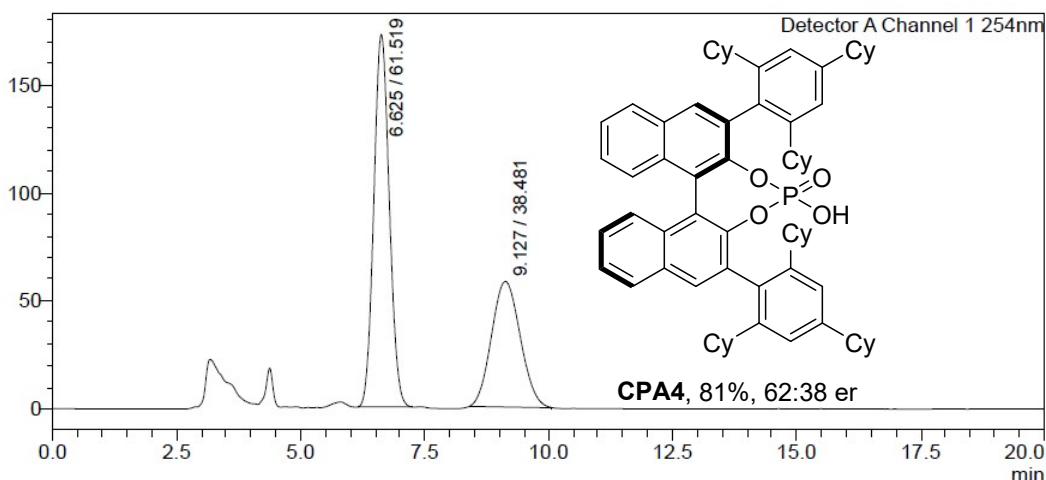

**<Peak Table>**

Detector A Channel 1 254nm

| Peak# | Ret. Time | Area    | Height | Conc.  | Unit | Mark | Name |
|-------|-----------|---------|--------|--------|------|------|------|
| 1     | 6.625     | 3762724 | 172835 | 61.519 |      | M    |      |
| 2     | 9.127     | 2353670 | 58236  | 38.481 |      | M    |      |
| Total |           | 6116394 | 231071 |        |      |      |      |

**CPA5:** HPLC (Chiralpak AD-H column, n-hexane/2-propanol = 80/20, flow rate = 1 mL/min,  $\lambda = 254$  nm)  $t_R = 6.618$  min (minor), 9.112 min (major)

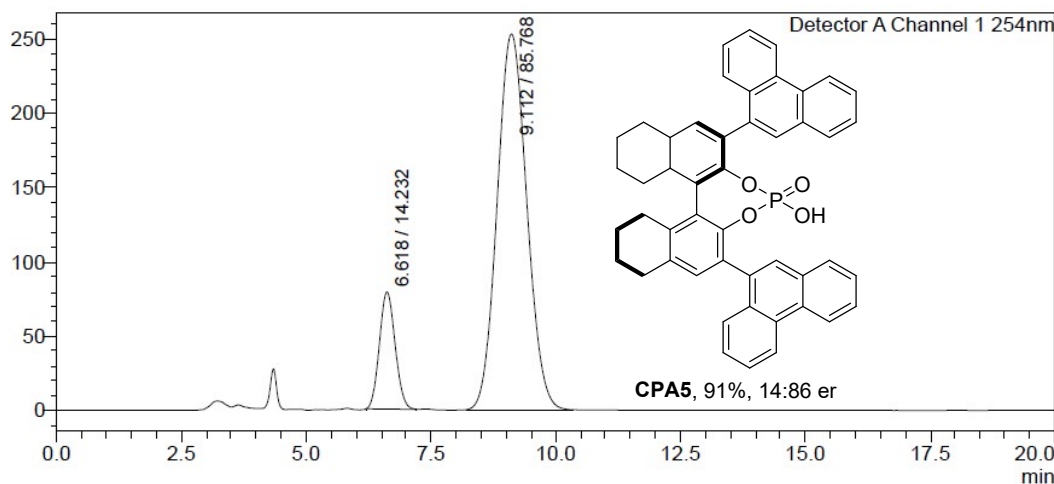

**<Peak Table>**

Detector A Channel 1 254nm

| Peak# | Ret. Time | Area     | Height | Conc.  | Unit | Mark | Name |
|-------|-----------|----------|--------|--------|------|------|------|
| 1     | 6.618     | 1730603  | 78837  | 14.232 |      | M    |      |
| 2     | 9.112     | 10429285 | 252902 | 85.768 |      | M    |      |
| Total |           | 12159888 | 331739 |        |      |      |      |

**CPA6:** HPLC (Chiralpak AD-H column, n-hexane/2-propanol = 80/20, flow rate = 1 mL/min,  $\lambda = 254$  nm)  $t_R = 6.655$  min (major), 9.187 min (minor)

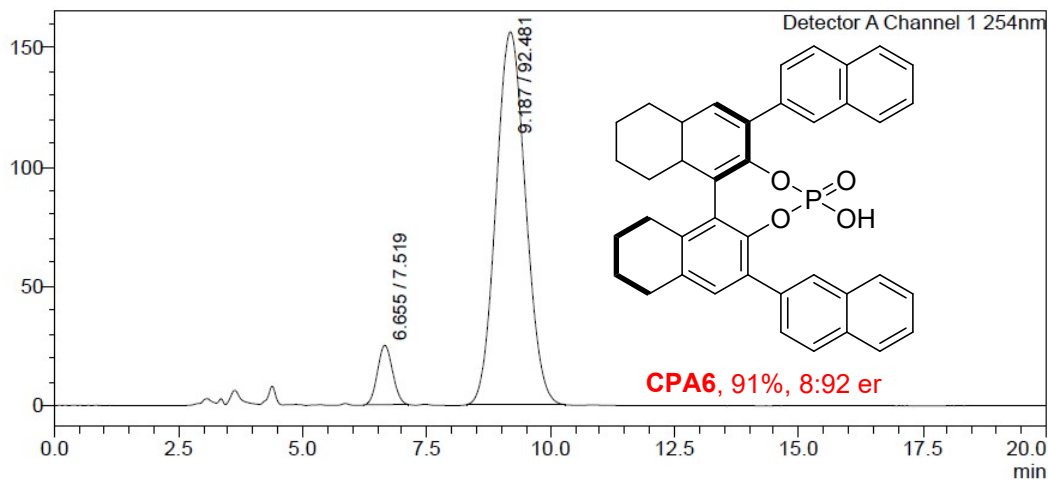

**<Peak Table>**

Detector A Channel 1 254nm

| Peak# | Ret. Time | Area    | Height | Conc.  | Unit | Mark | Name |
|-------|-----------|---------|--------|--------|------|------|------|
| 1     | 6.655     | 525801  | 24835  | 7.519  |      | M    |      |
| 2     | 9.187     | 6467347 | 156280 | 92.481 |      | M    |      |
| Total |           | 6993147 | 181115 |        |      |      |      |

**CPA7:** HPLC (Chiralpak AD-H column, n-hexane/2-propanol = 80/20, flow rate = 1 mL/min,  $\lambda = 254$  nm)  $t_R = 6.640$  min (minor), 9.158 min (major)

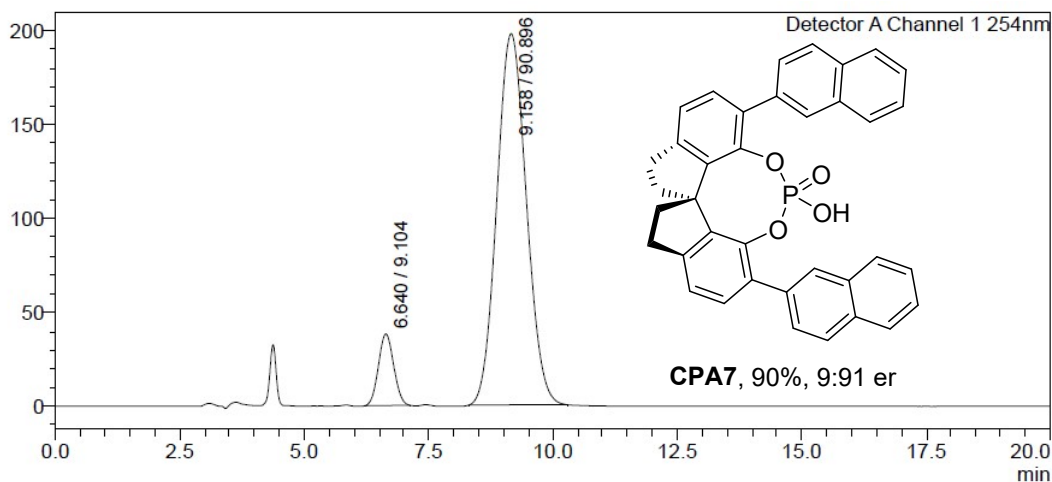

**<Peak Table>**

Detector A Channel 1 254nm

| Peak# | Ret. Time | Area    | Height | Conc.  | Unit | Mark | Name |
|-------|-----------|---------|--------|--------|------|------|------|
| 1     | 6.640     | 815299  | 38137  | 9.104  |      | M    |      |
| 2     | 9.158     | 8139653 | 197669 | 90.896 |      | M    |      |
| Total |           | 8954952 | 235806 |        |      |      |      |

**CPA8:** HPLC (Chiralpak AD-H column, n-hexane/2-propanol = 80/20, flow rate = 1 mL/min,  $\lambda = 254$  nm)  $t_R = 6.867$  min (minor), 9.088 min (major)

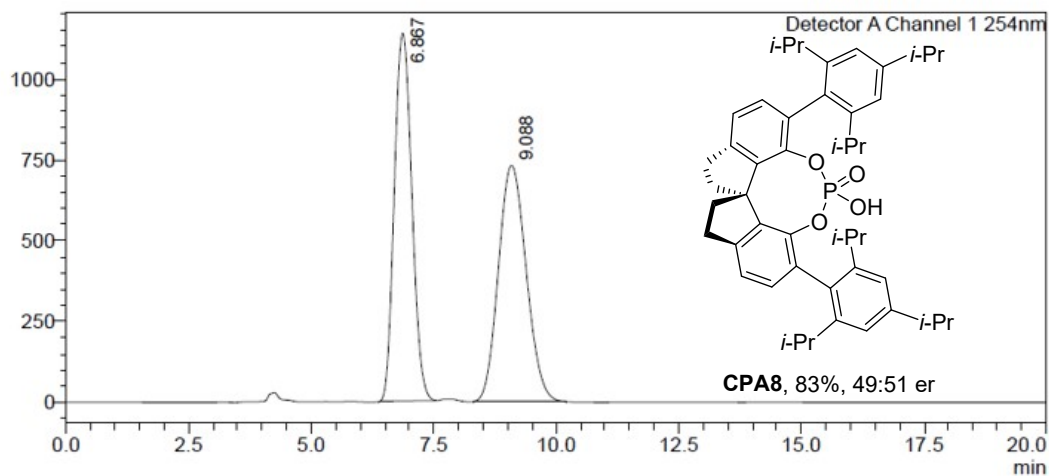

| Peak# | Ret. Time | Area     | Height  | Conc.  | Unit | Mark | Name |
|-------|-----------|----------|---------|--------|------|------|------|
| 1     | 6.867     | 28297499 | 1137728 | 49.508 |      | M    |      |
| 2     | 9.088     | 28859755 | 730508  | 50.492 |      | M    |      |
| Total |           | 57157254 | 1868236 |        |      |      |      |

**CPA9:** HPLC (Chiralpak AD-H column, n-hexane/2-propanol = 80/20, flow rate = 1 mL/min,  $\lambda = 254$  nm)  $t_R = 6.640$  min (major), 9.185 min (minor)

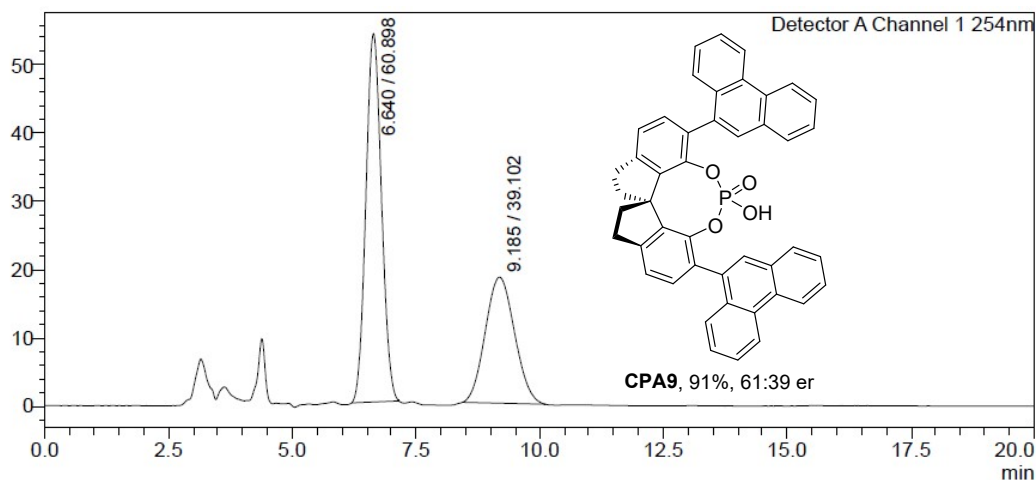

**<Peak Table>**

Detector A Channel 1 254nm

| Peak# | Ret. Time | Area    | Height | Conc.  | Unit | Mark | Name |
|-------|-----------|---------|--------|--------|------|------|------|
| 1     | 6.640     | 1189459 | 54144  | 60.898 |      | M    |      |
| 2     | 9.185     | 763751  | 18536  | 39.102 |      | M    |      |
| Total |           | 1953210 | 72680  |        |      |      |      |

**CPA10:** HPLC (Chiralpak AD-H column, n-hexane/2-propanol = 80/20, flow rate = 1 mL/min,  $\lambda = 254$  nm)  $t_R = 6.620$  min (major), 9.560 min (minor)

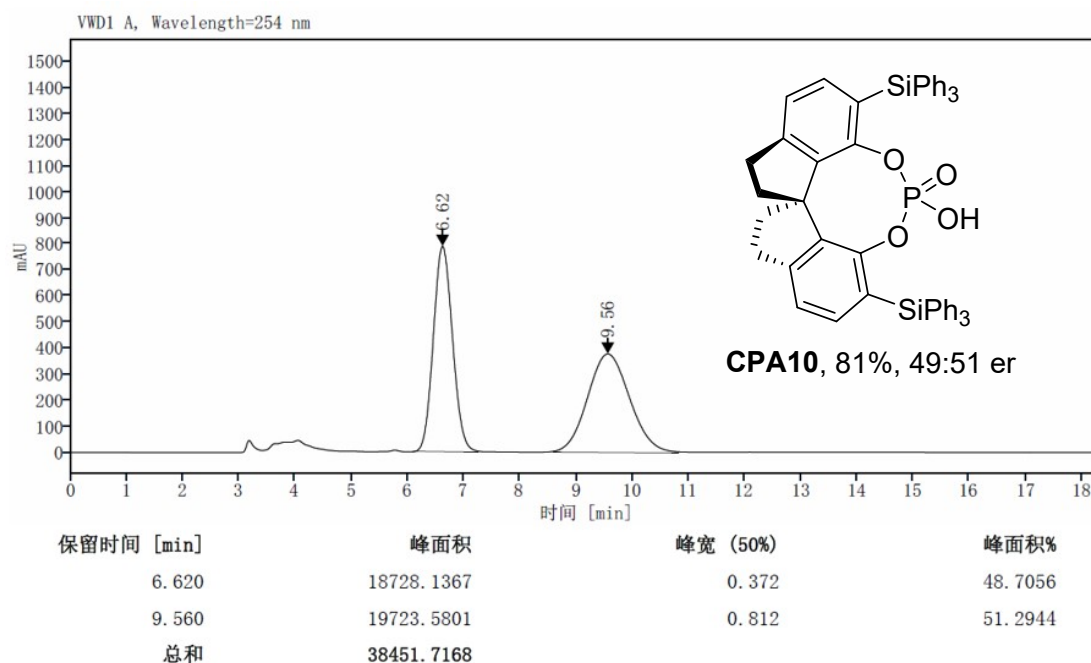

## 8.2 HPLC Spectra of compound 3a

**Racemic 3a:** (Chiralpak OD-H column n-hexane/2-propanol = 90/10, flow rate = 1 mL/min)  $t_R = 10.067$  min (major), 12.550 min (minor).

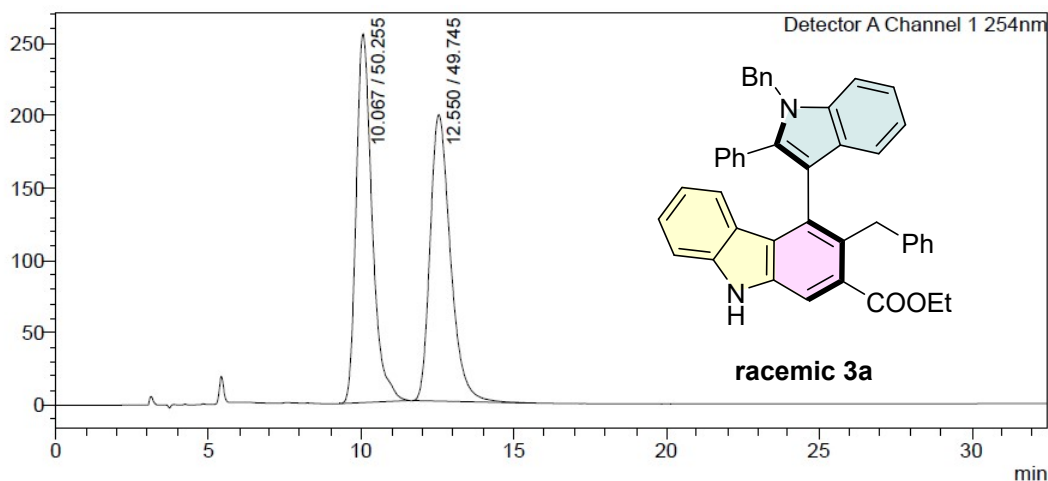

### <Peak Table>

Detector A Channel 1 254nm

| Peak# | Ret. Time | Area     | Height | Conc.  | Unit | Mark | Name |
|-------|-----------|----------|--------|--------|------|------|------|
| 1     | 10.067    | 9248093  | 254647 | 50.255 |      | M    |      |
| 2     | 12.550    | 9154182  | 197826 | 49.745 |      | M    |      |
| Total |           | 18402275 | 452473 |        |      |      |      |

**Chiral 3a** (DBU, 40 °C, 2 h): (Chiralpak OD-H column n-hexane/2-propanol = 90/10, flow rate = 1 mL/min)  $t_R = 10.080$  min (major), 12.590 min (minor).

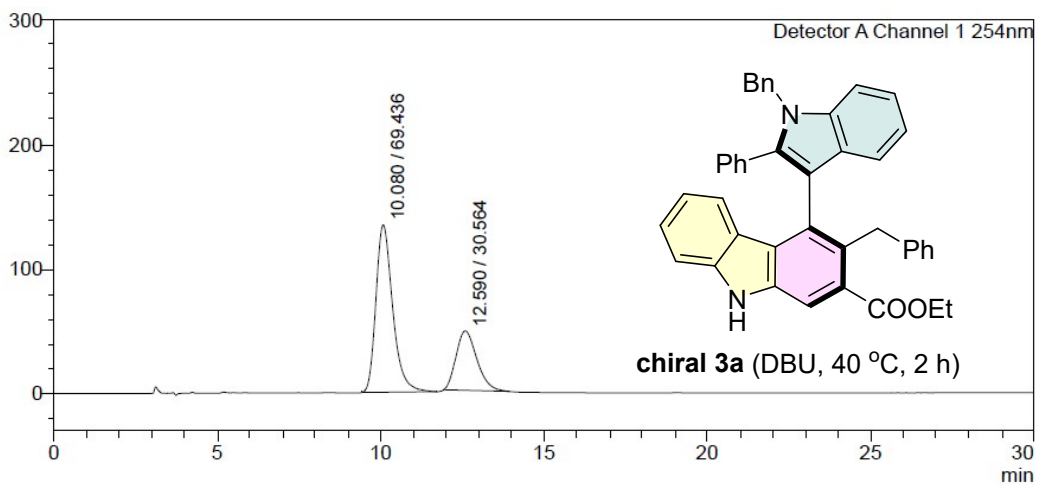

<Peak Table>

Detector A Channel 1 254nm

| Peak# | Ret. Time | Area    | Height | Conc.  | Unit | Mark | Name |
|-------|-----------|---------|--------|--------|------|------|------|
| 1     | 10.080    | 4818186 | 134396 | 69.436 |      | M    |      |
| 2     | 12.590    | 2120873 | 47770  | 30.564 |      | M    |      |
| Total |           | 6939058 | 182166 |        |      |      |      |

**Chiral 3a** ( $K_2CO_3$ , r.t., 12 h): (Chiralpak OD-H column n-hexane/2-propanol = 90/10, flow rate = 1 mL/min)  $t_R$  = 10.224 min (major), 13.195 min (minor).

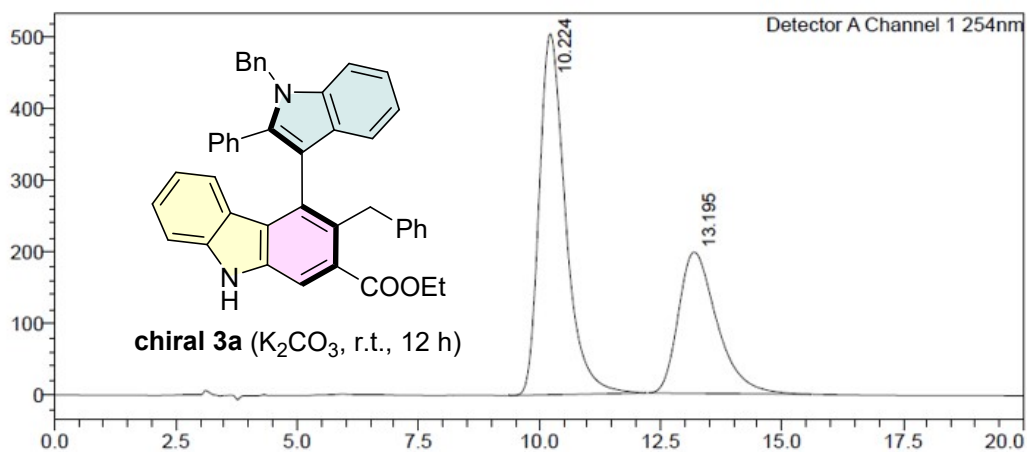

| Peak# | Ret. Time | Area     | Height | Conc.  | Unit | Mark | Name |
|-------|-----------|----------|--------|--------|------|------|------|
| 1     | 10.224    | 19077199 | 505249 | 63.491 |      | M    |      |
| 2     | 13.195    | 10969884 | 197602 | 36.509 |      | M    |      |
| Total |           | 30047083 | 702851 |        |      |      |      |

## 9. UV-Vis Absorption Spectroscopy, Fluorescence Emission Spectroscopy and Fluorescence Quantum Yields

**Sample preparation of UV-Vis Absorption Spectroscopy:** To a 10 mL of volumetric flask was added **3e** or other products (0.01 mmol). Subsequently, draw 30  $\mu\text{L}$  of this solution using a pipette and dilute it with DCM to 3 mL. The flask with solution was shaken several times for using.

**Quantum yield determination<sup>8</sup>:** To a 10 mL of volumetric flask was added **3e** or other products (0.01 mmol). Subsequently, draw 1.5  $\mu\text{L}$  of this solution using a pipette and dilute it with DCM to 3 mL. The flask with solution was shaken several times for using. All the quantum yields of samples were determined based on  $5.0 \times 10^{-7}$  mol/L quinine sulfate in 0.5 M  $\text{H}_2\text{SO}_4$  ( $\Phi = 0.52$ ). Fluorescence emission of all the samples were measured in DCM,  $c = 0.5 \mu\text{M}$ , excited at 302 nm with 10 nm EX slit and 10.0 nm EM slit.

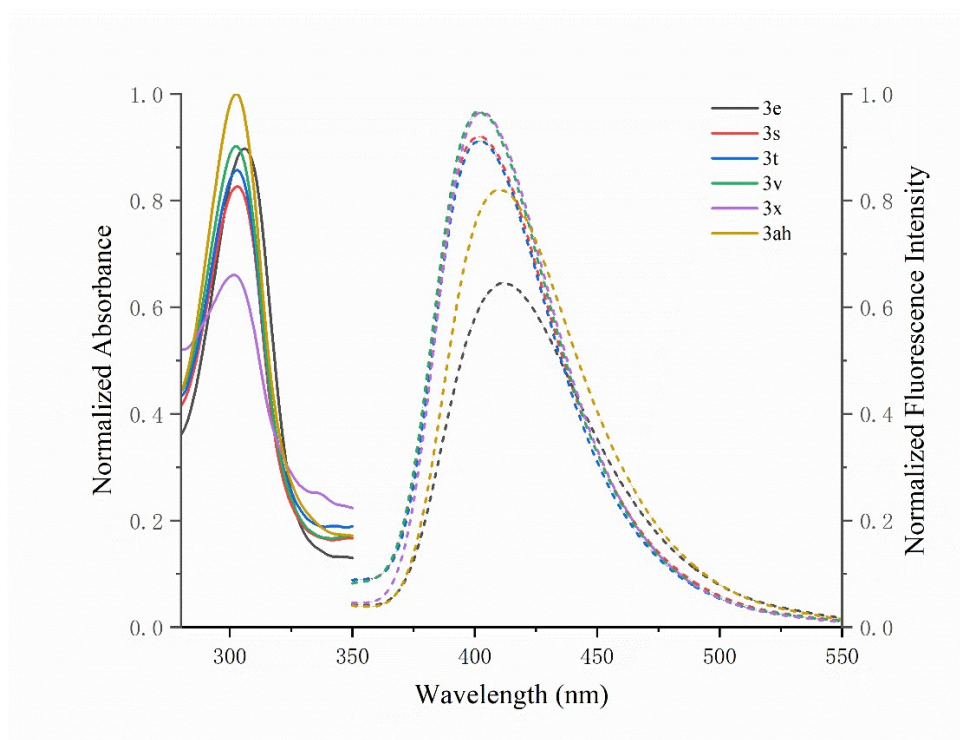

**Figure S1.** UV-Vis absorption spectra (solid line) and fluorescence emission spectra (dashed line) of **3e**, **3s**, **3t**, **3v**, **3x** and **3ah**.

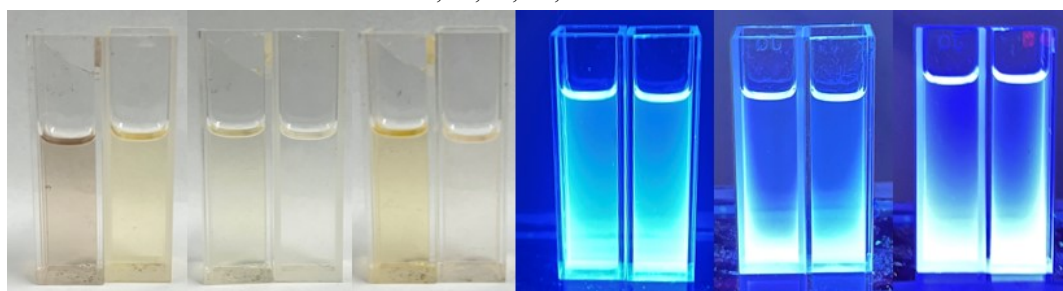

**Figure S2.** Fluorescence emission, without 365 UV light (left), with 365nm UV light (right) (from left to right: **3v**, **3t**, **3x**, **3s**, **3e** and **3ah**)

# 10. NMR Spectra of Compound 3

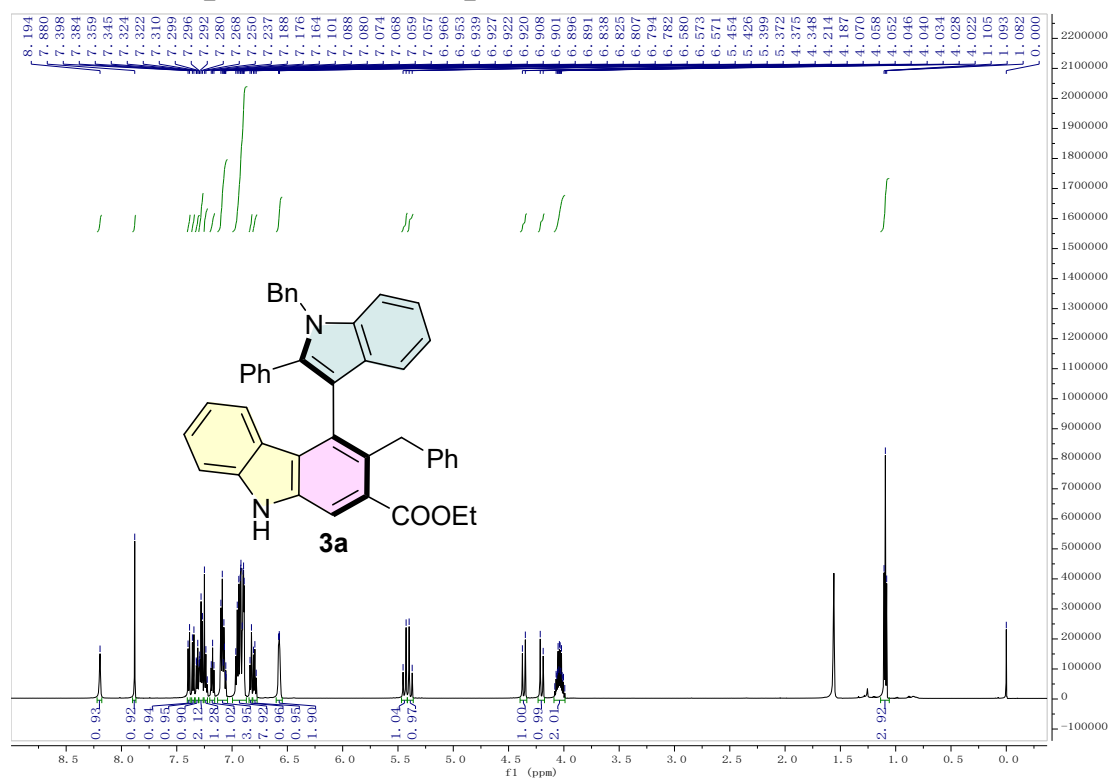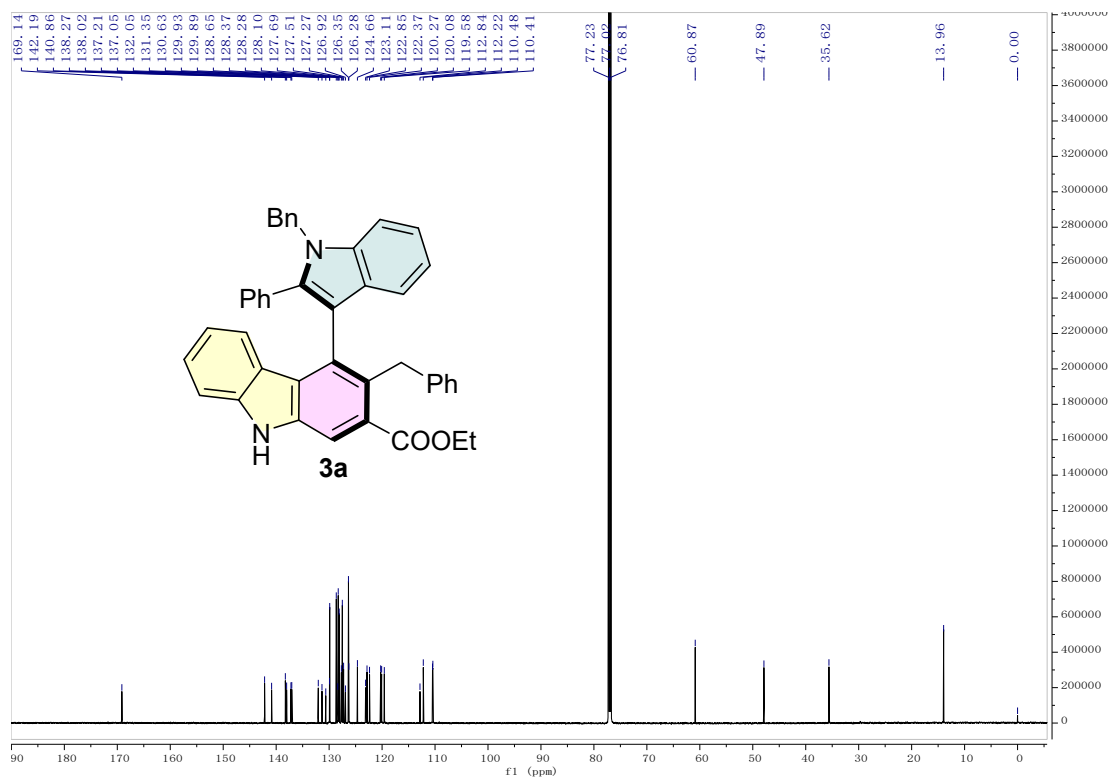

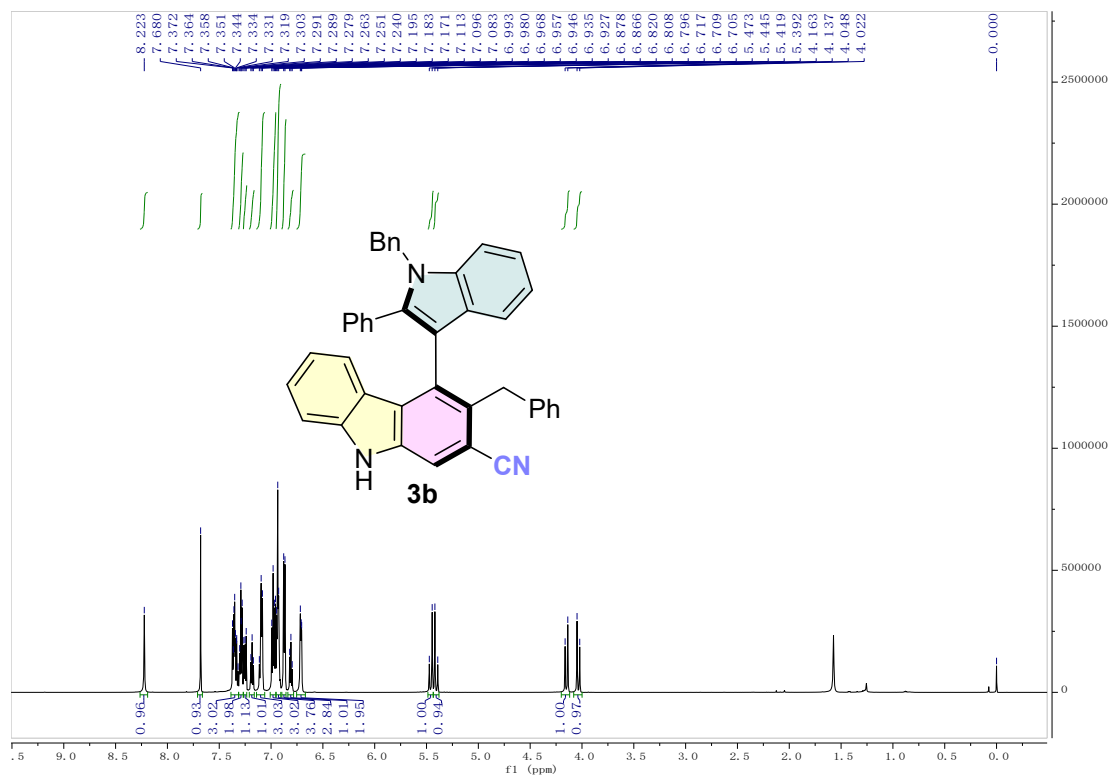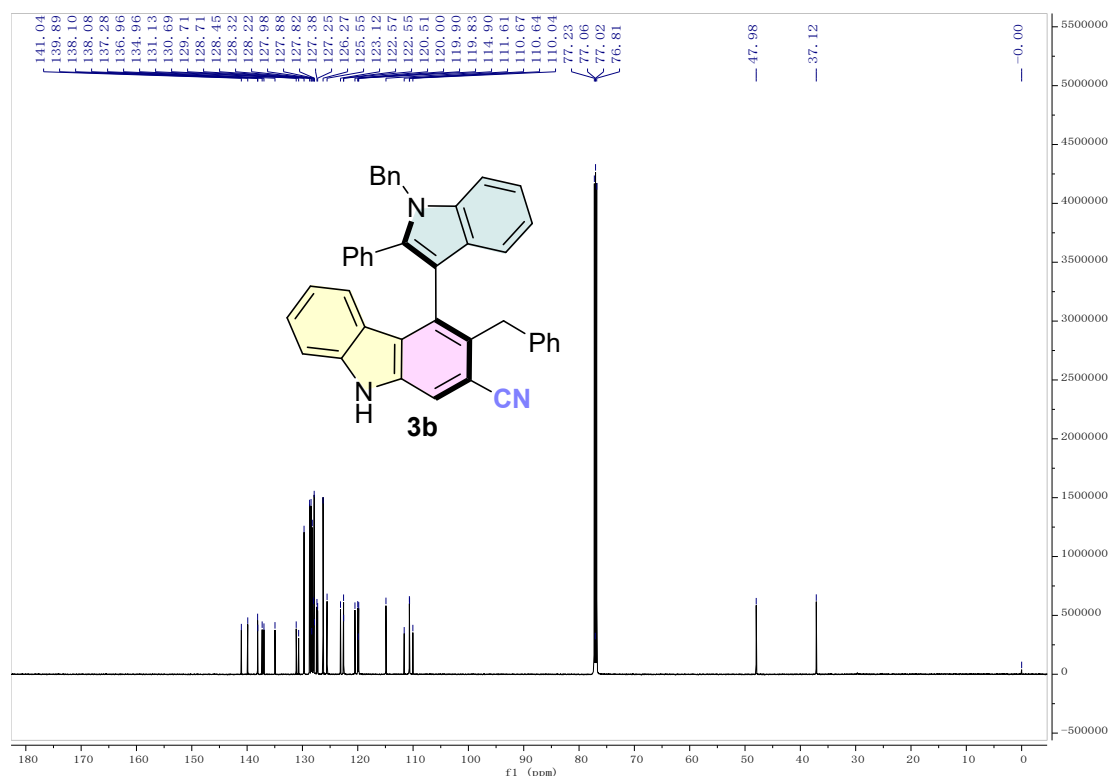



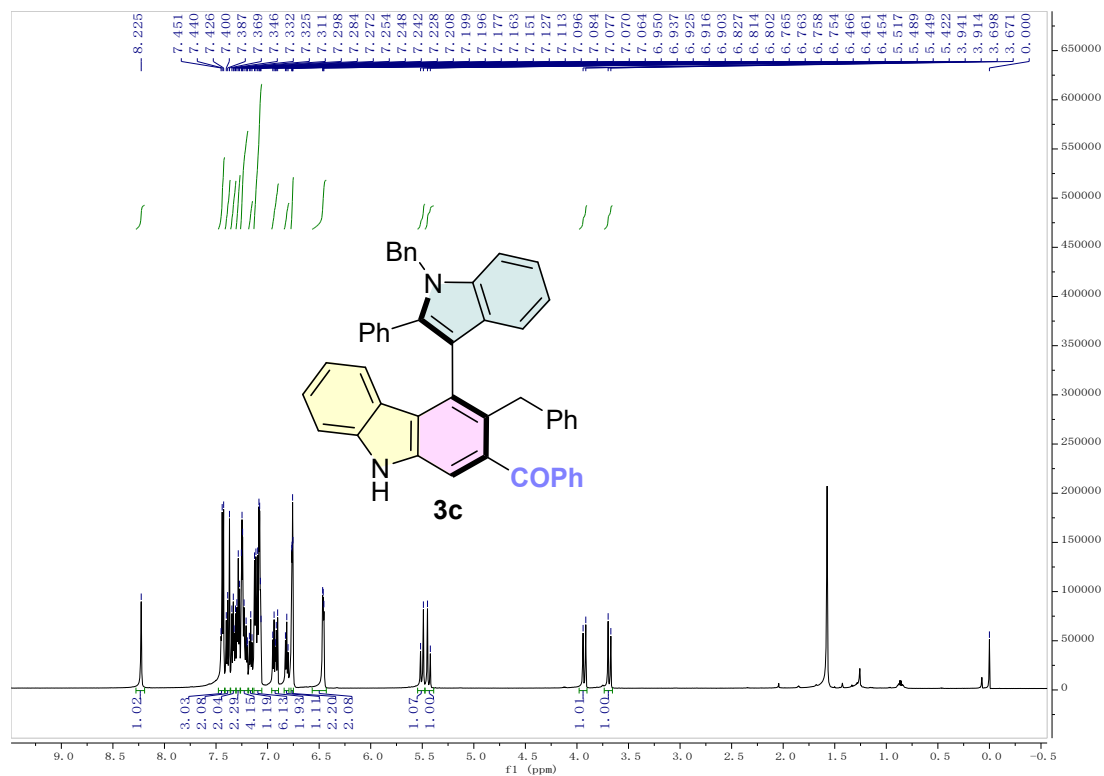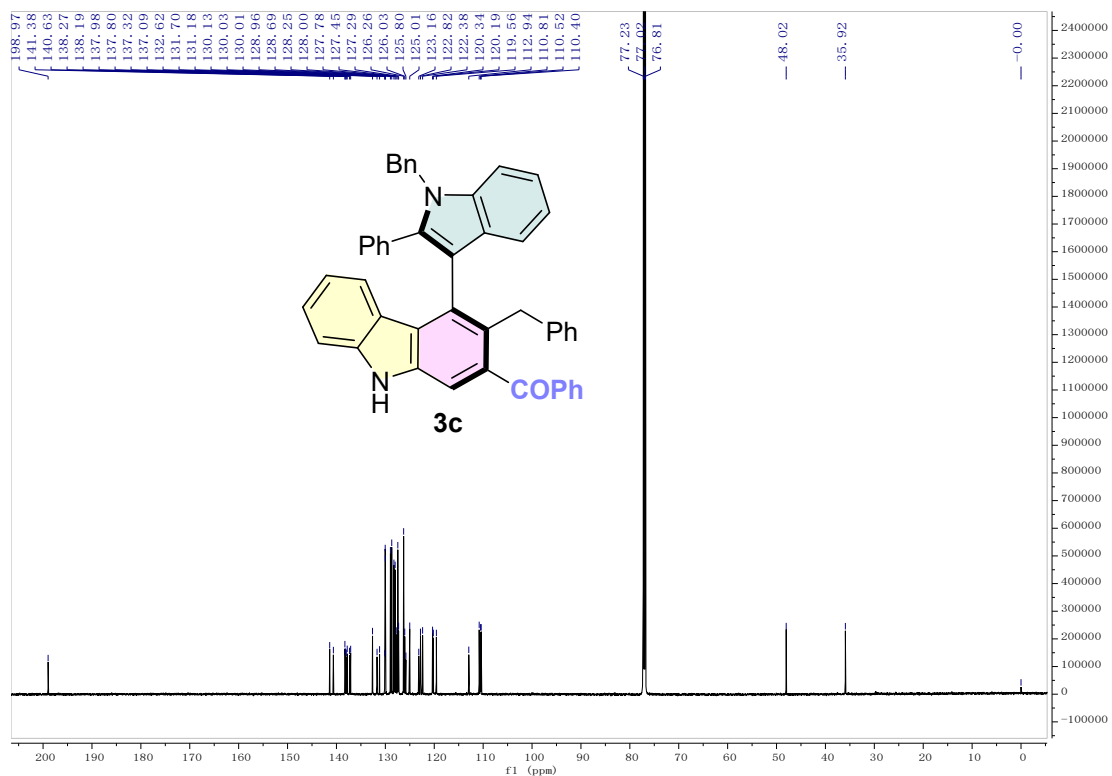

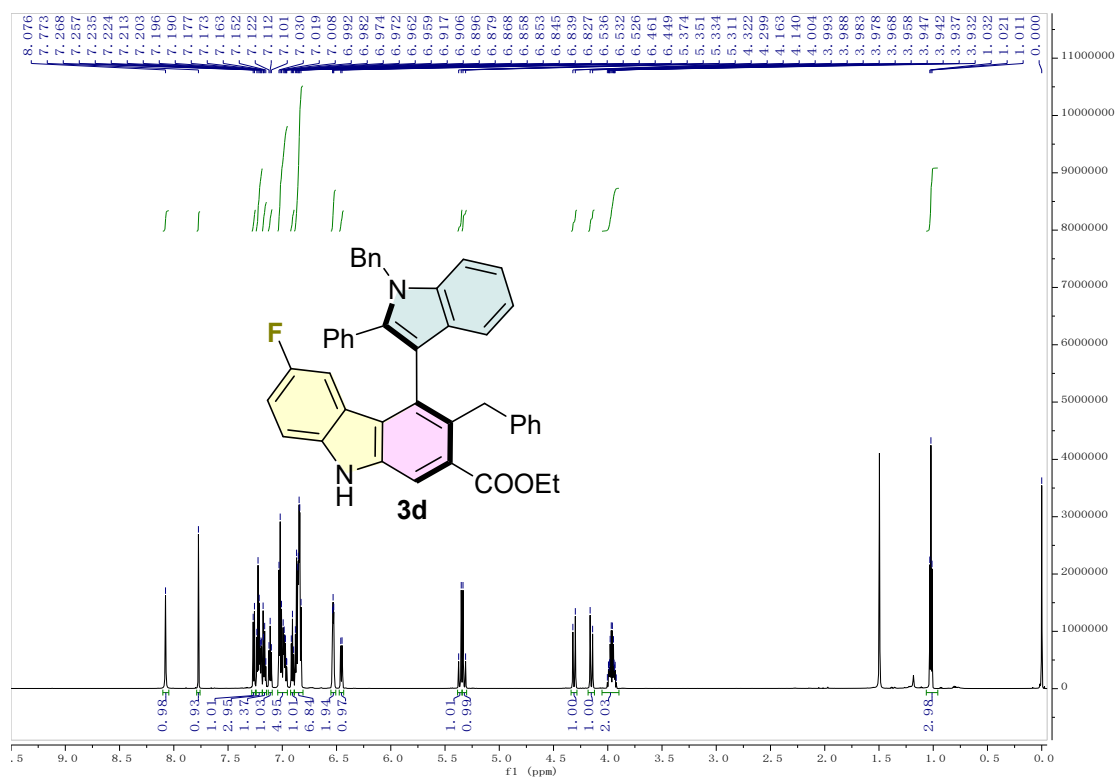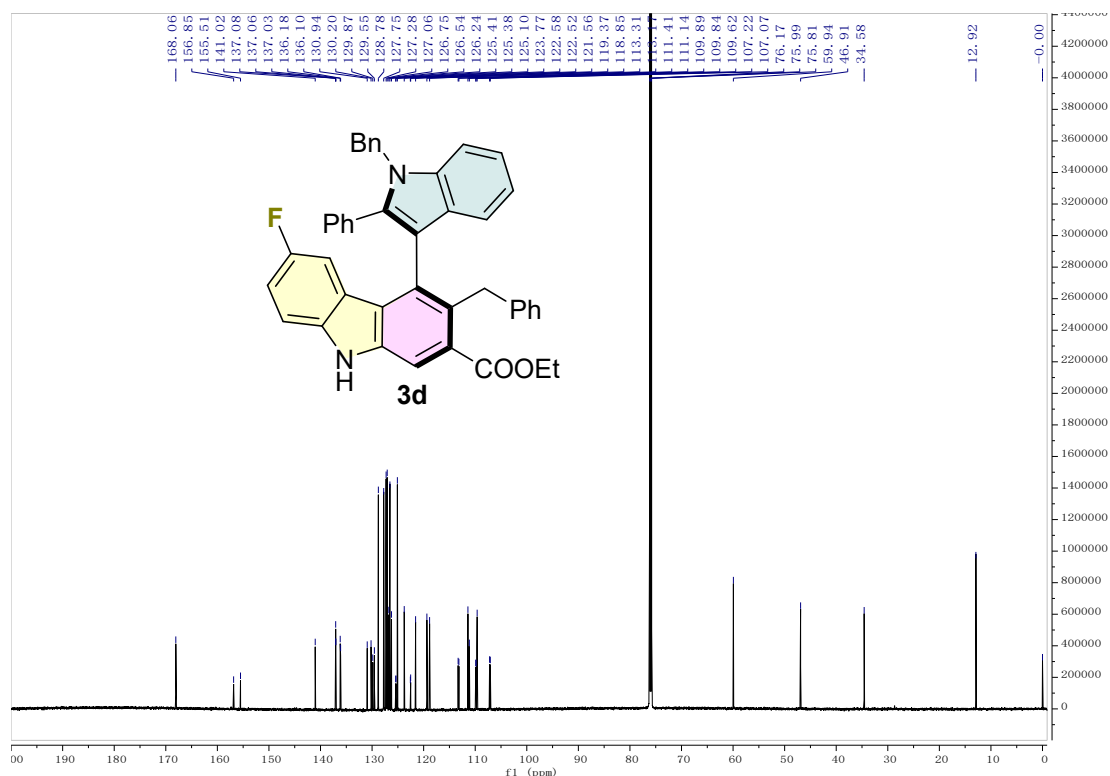

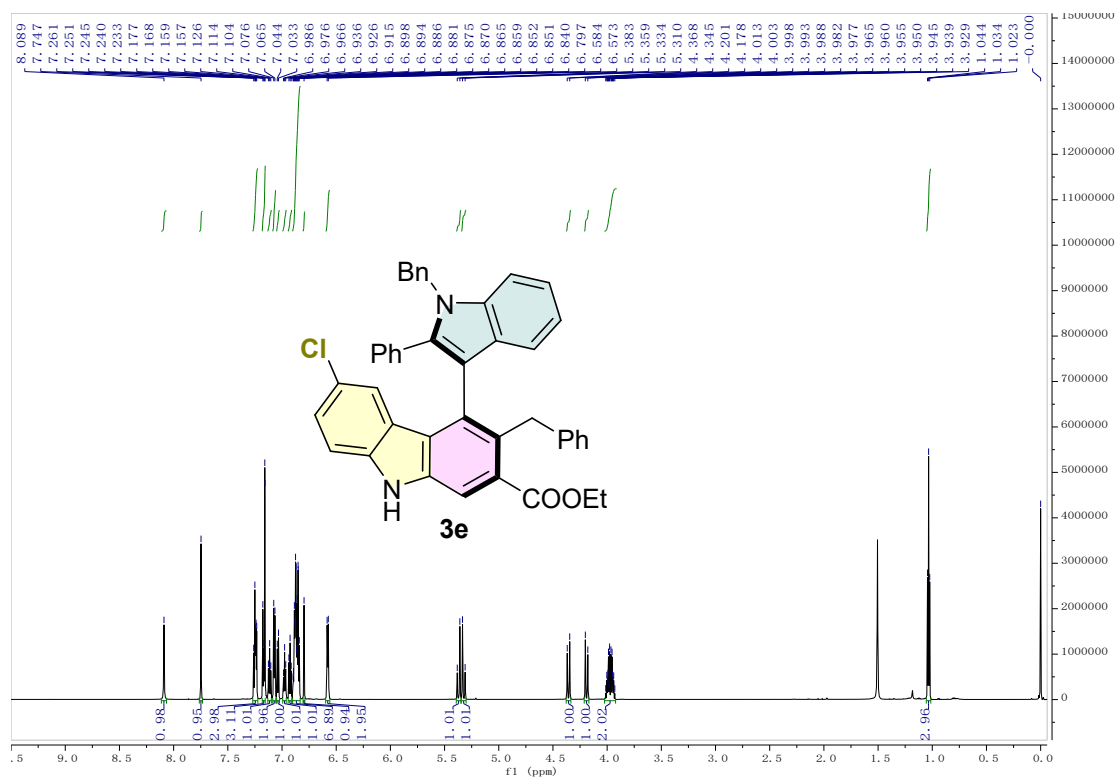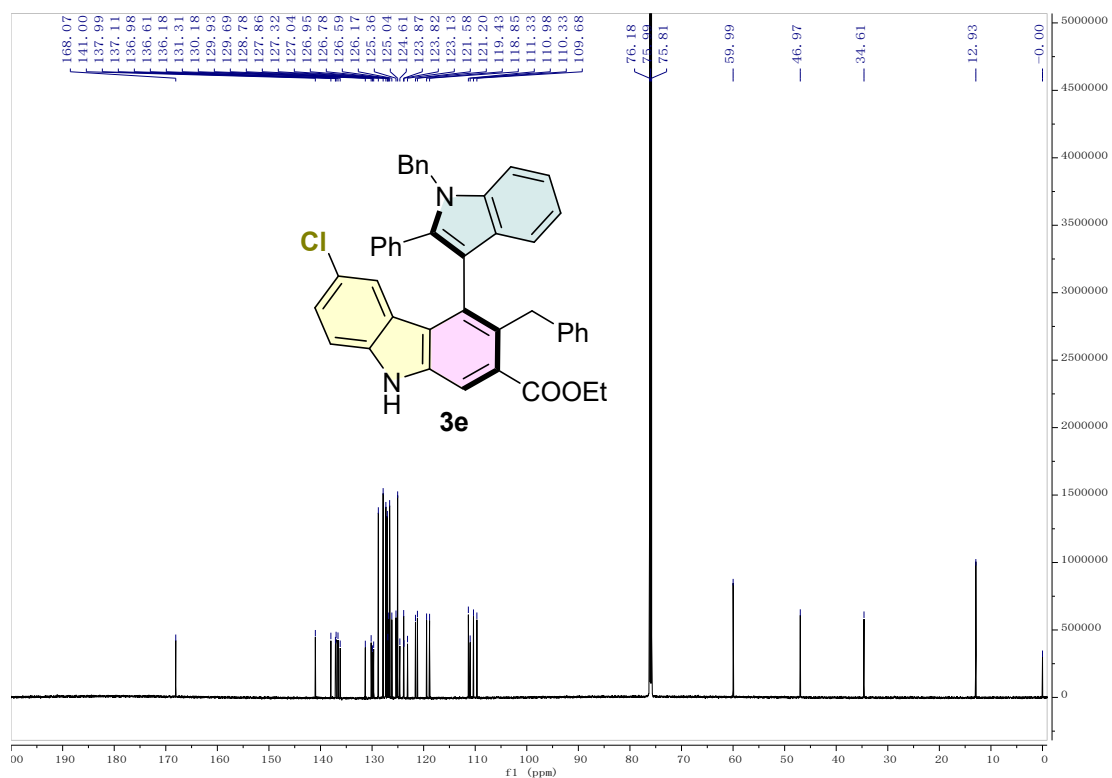

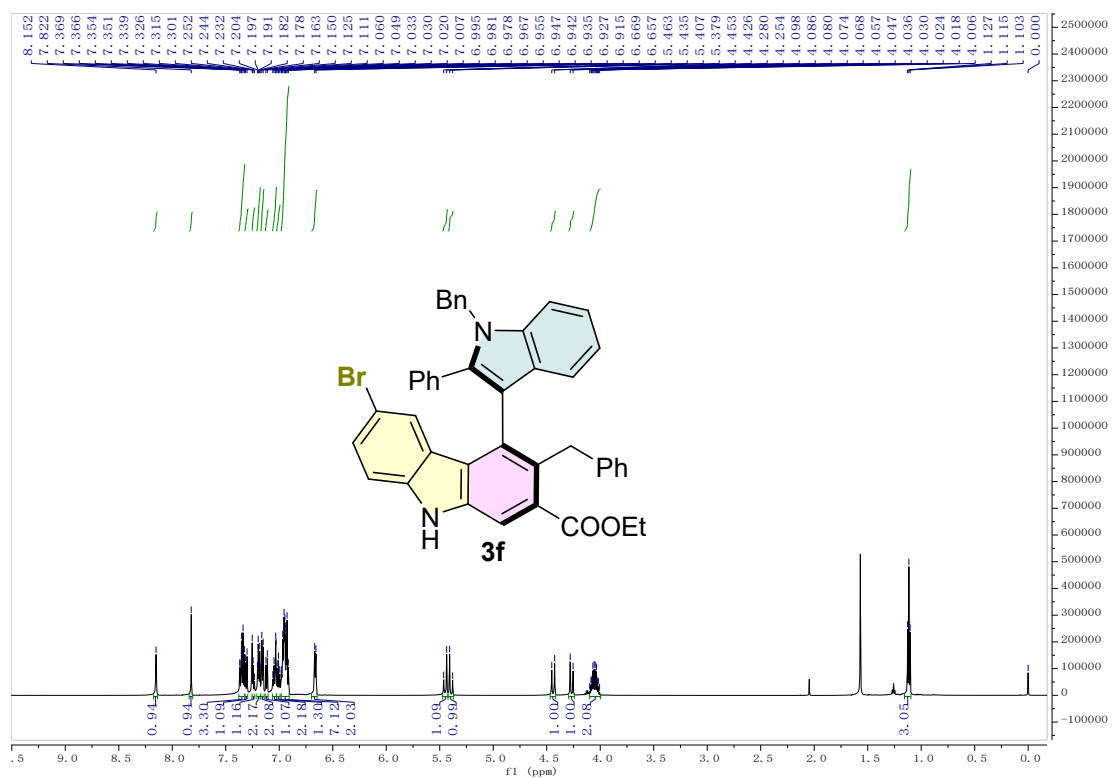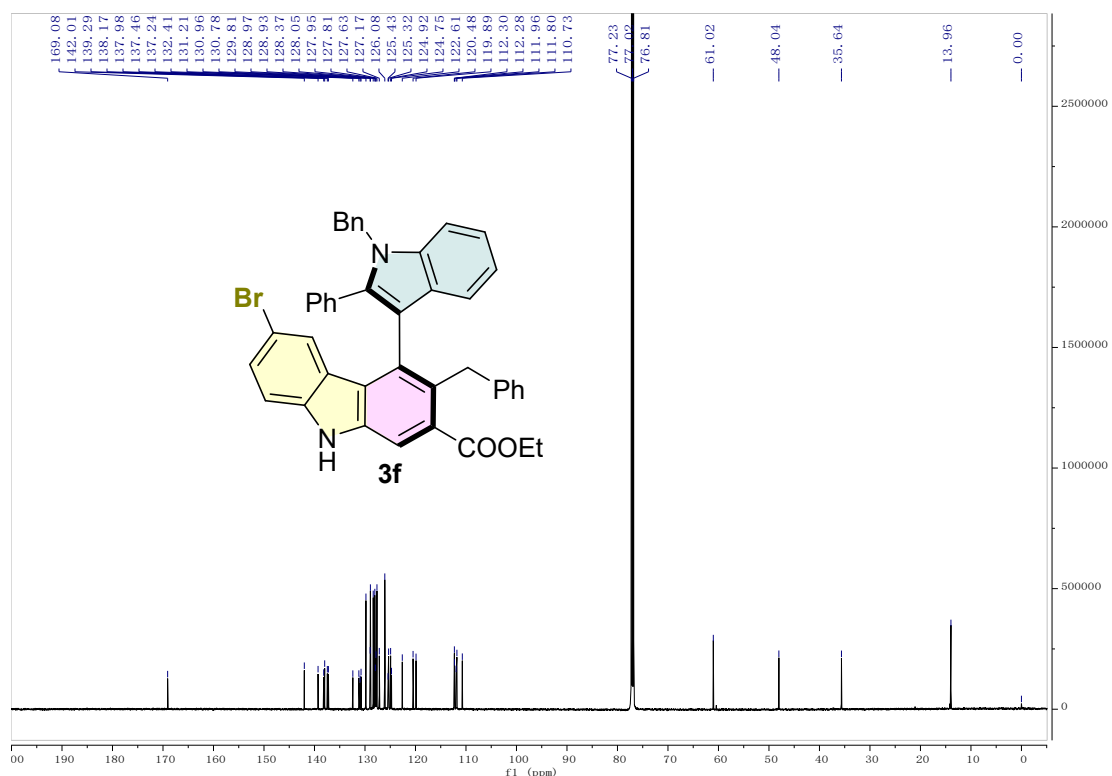

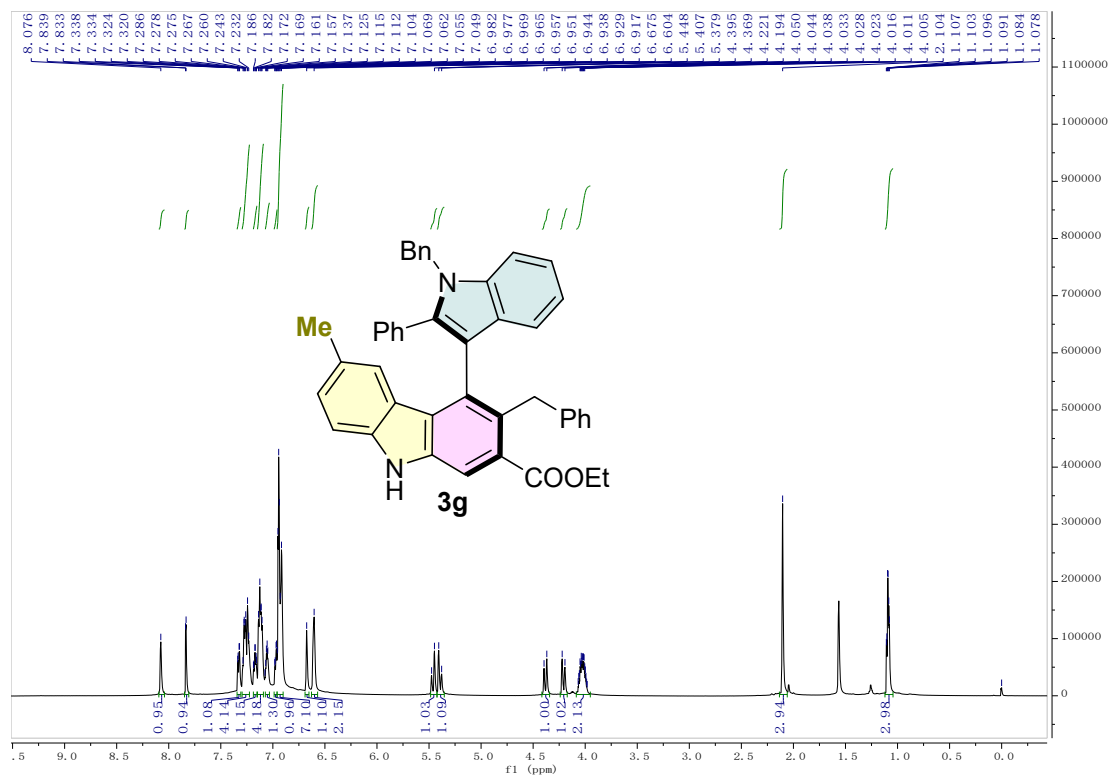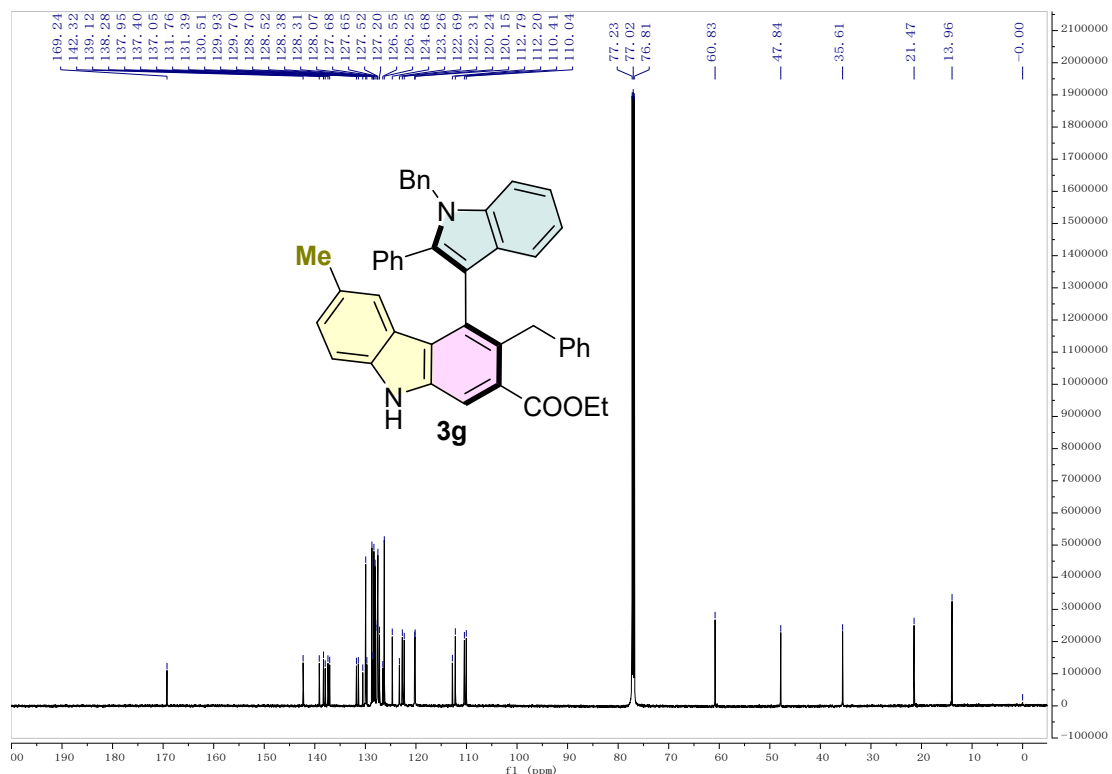

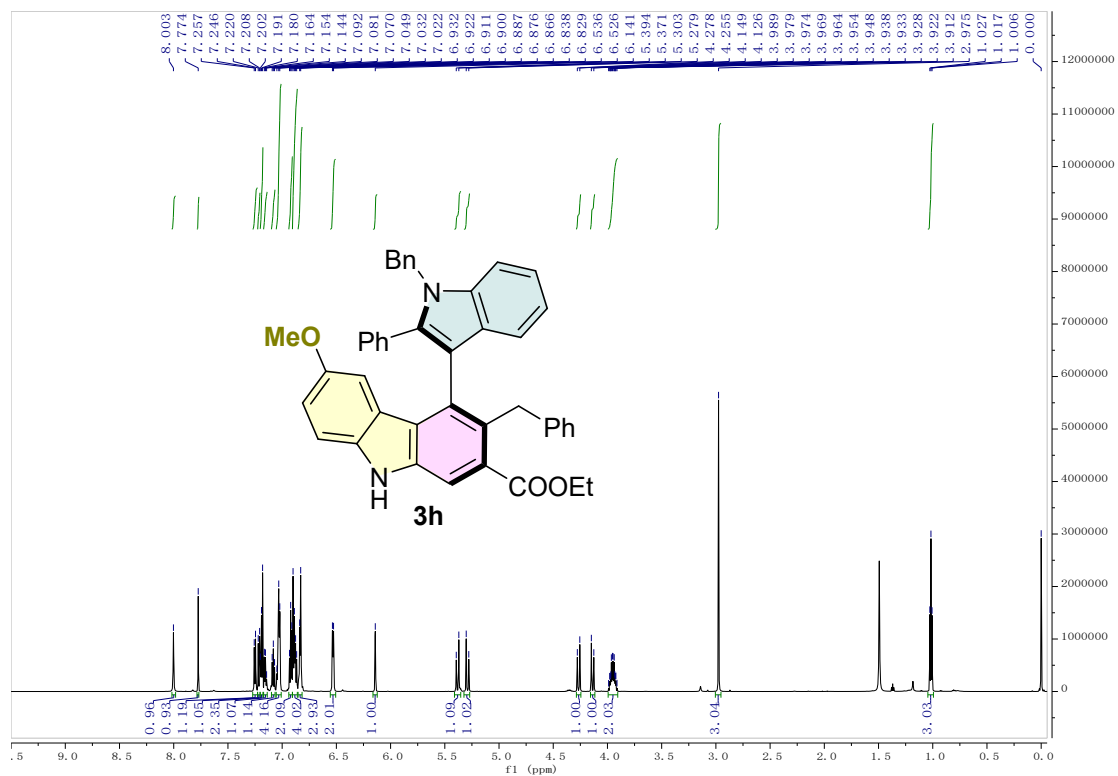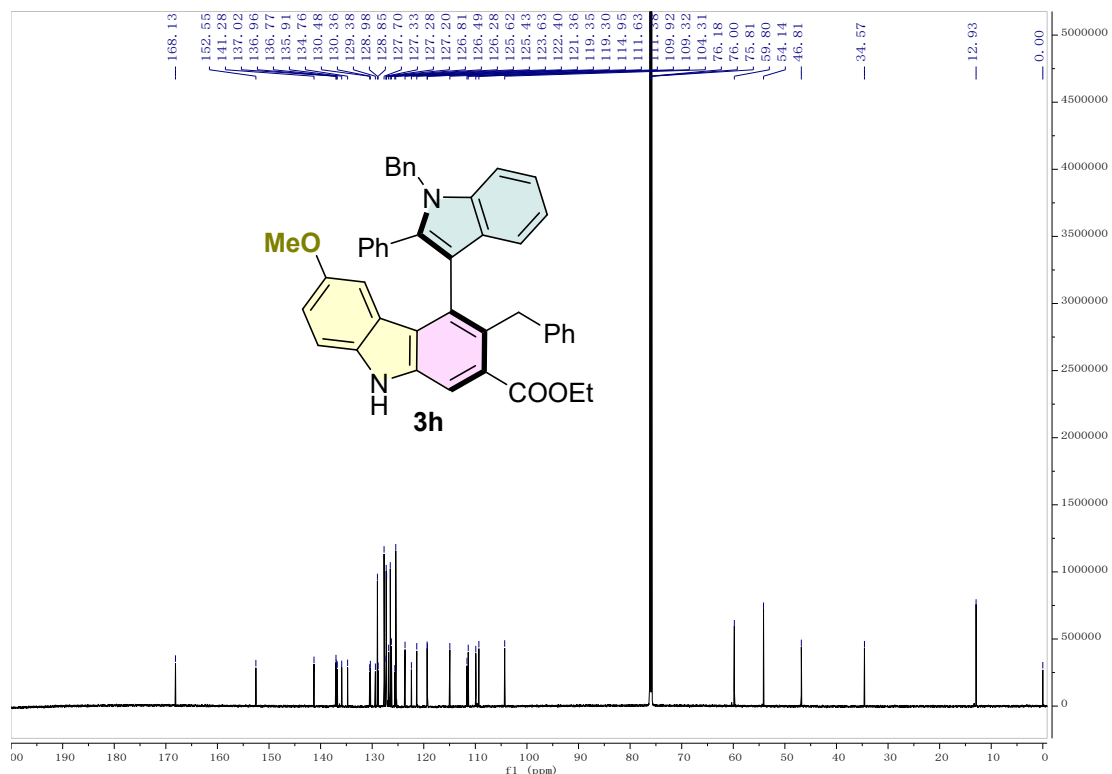

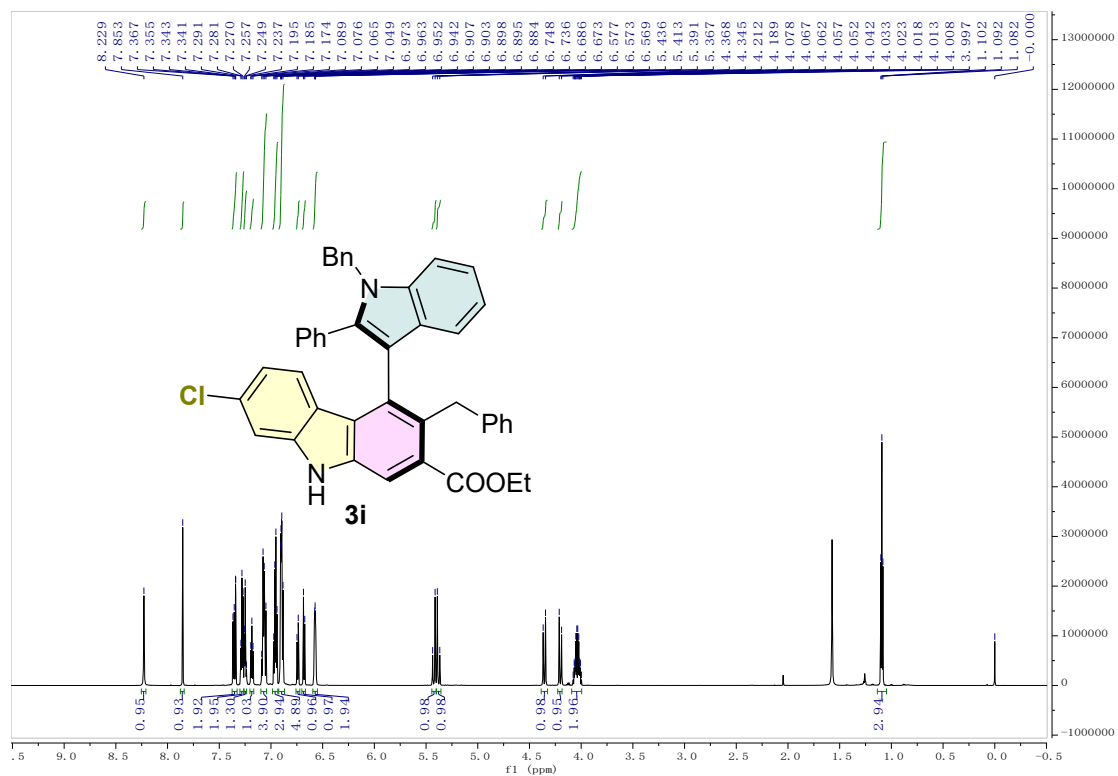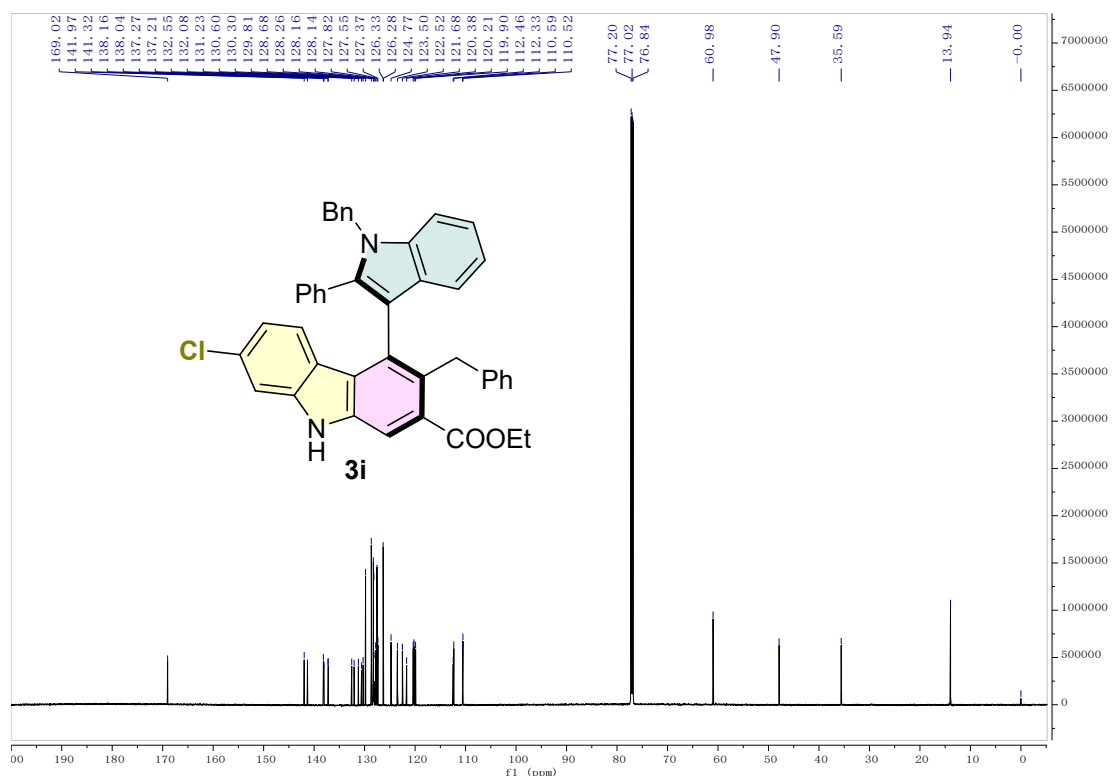

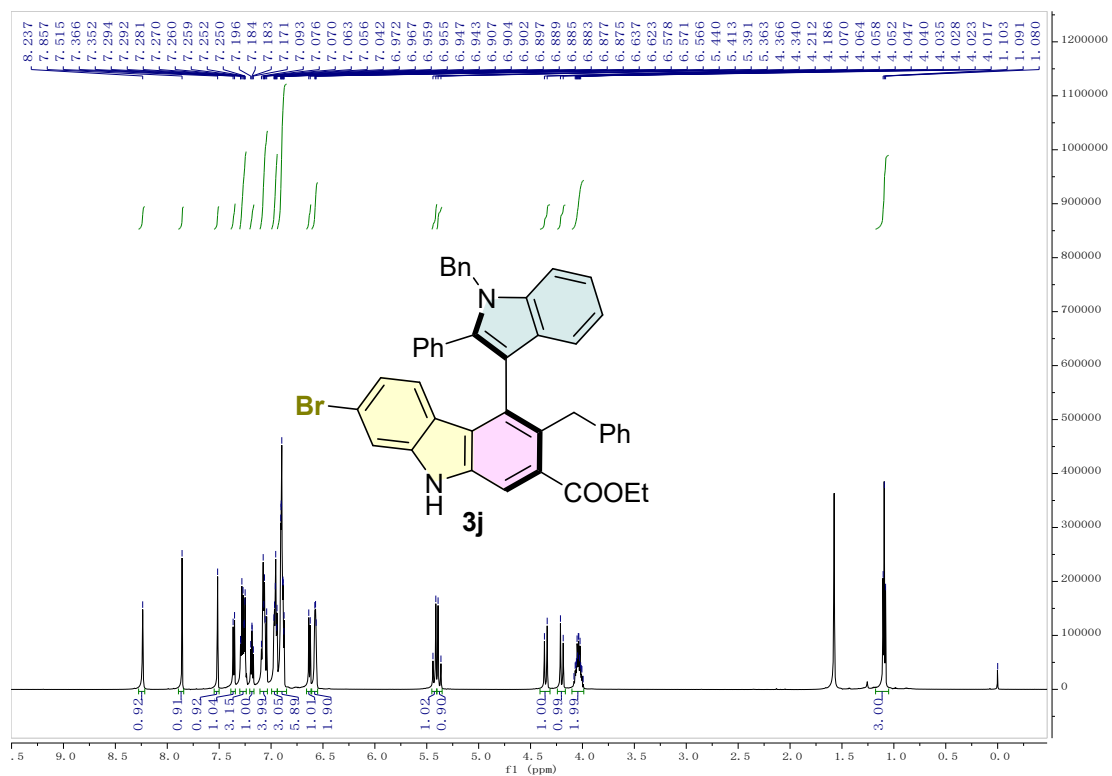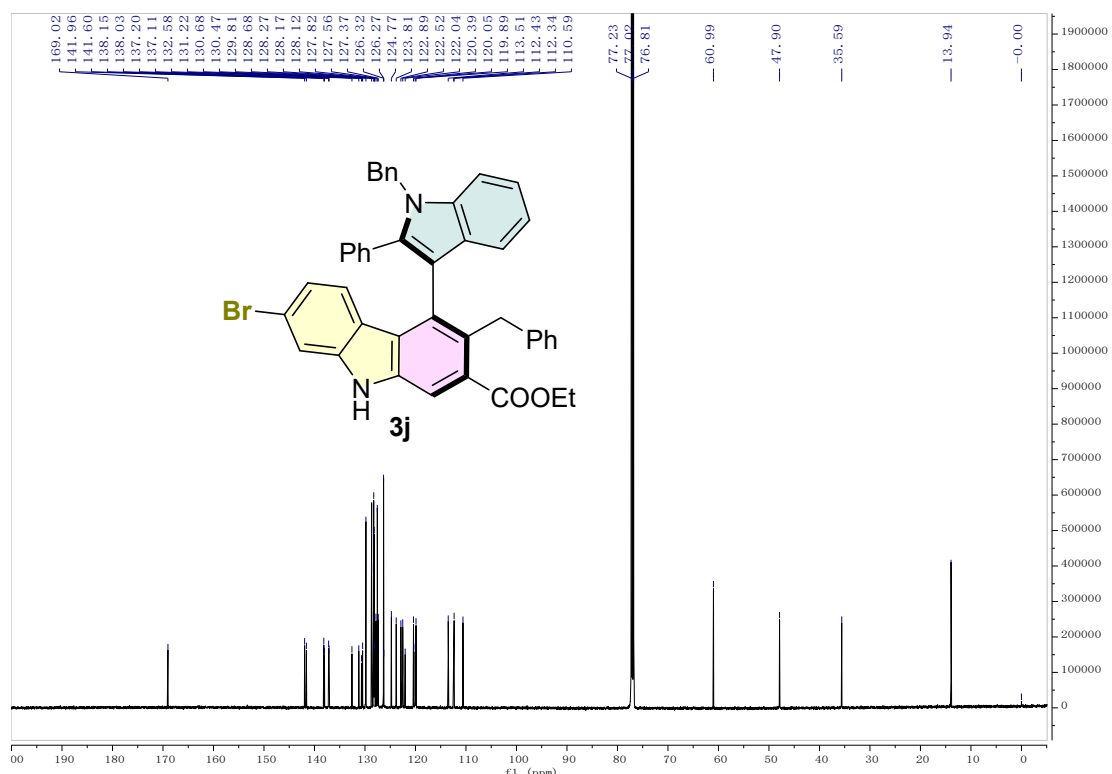



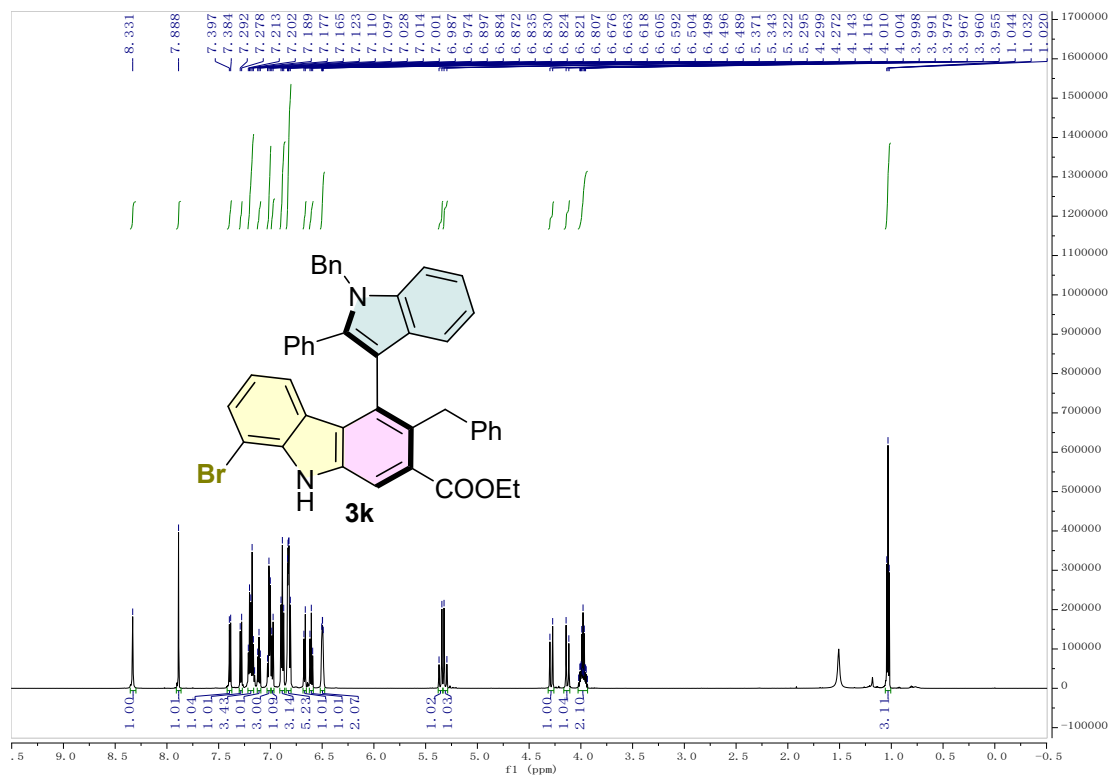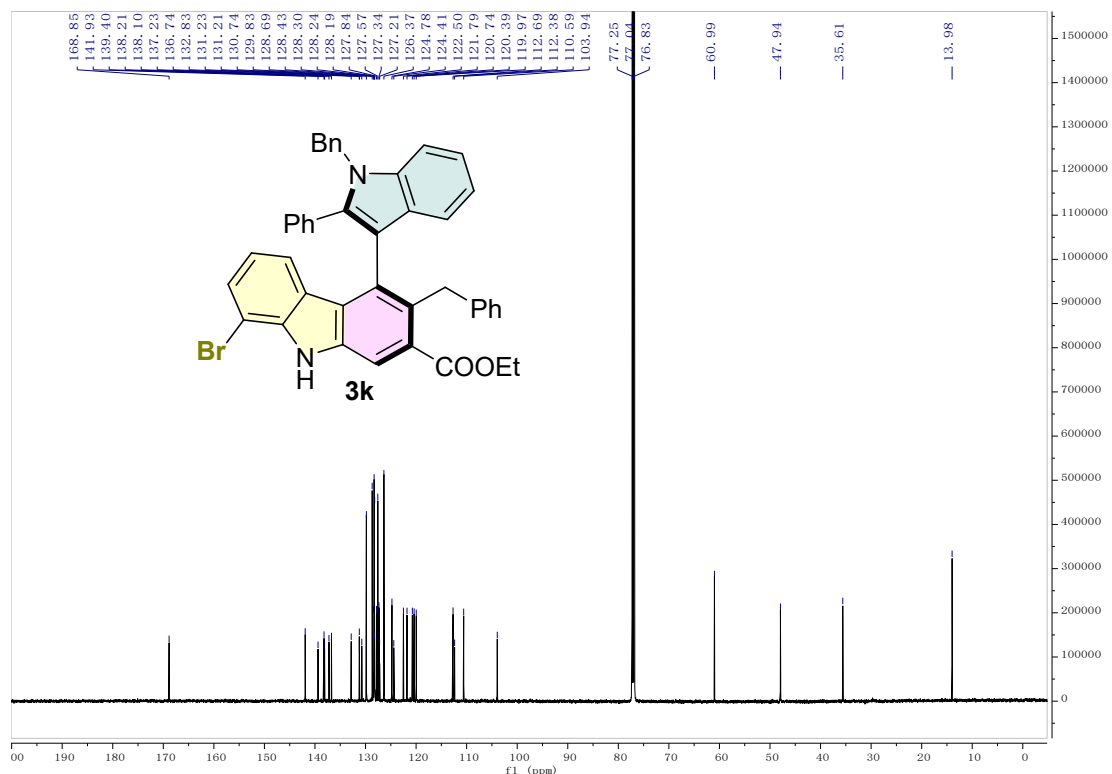

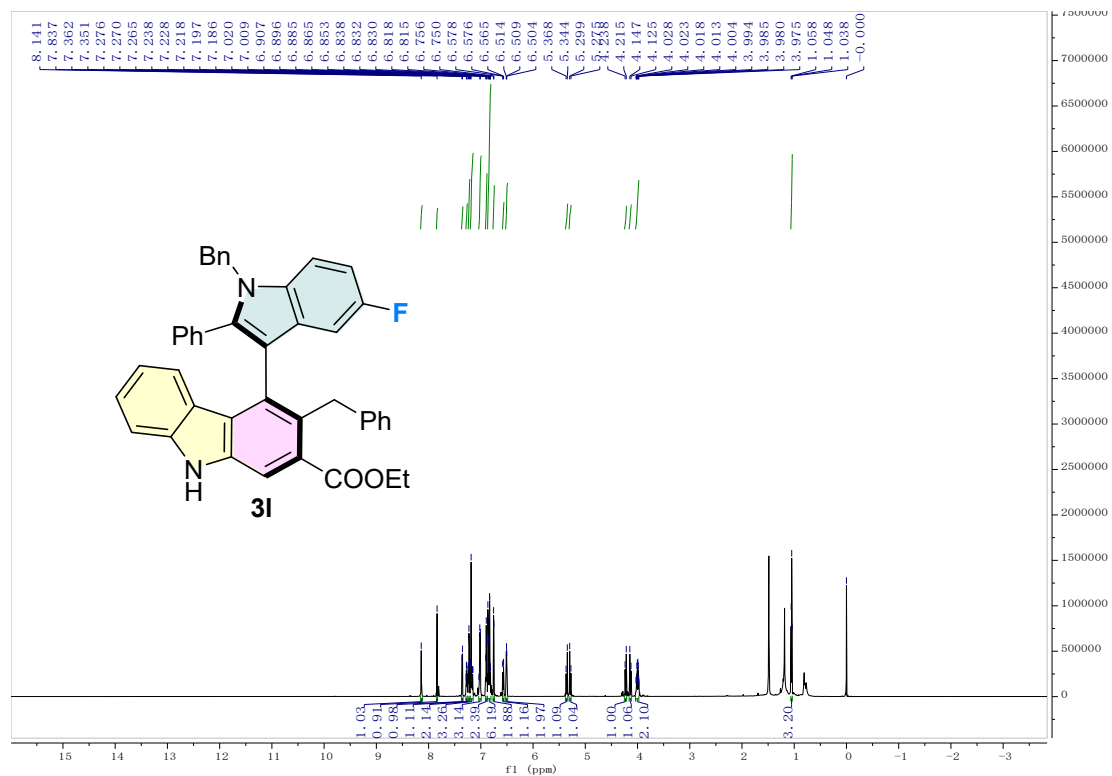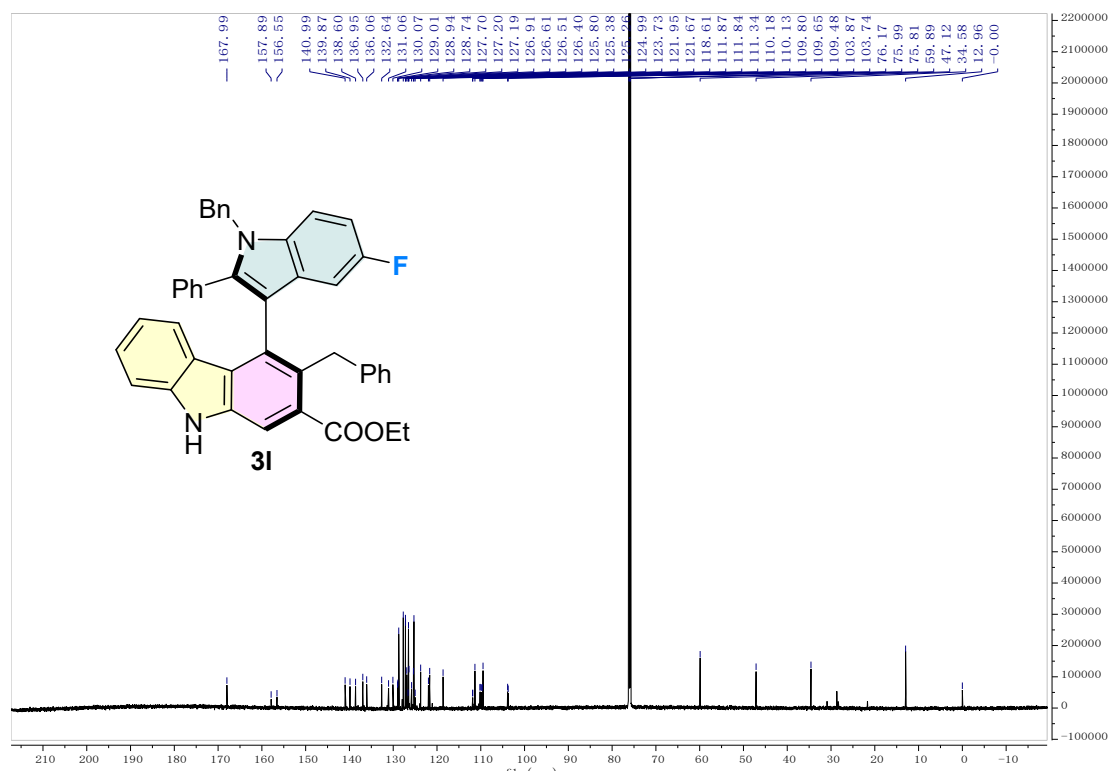

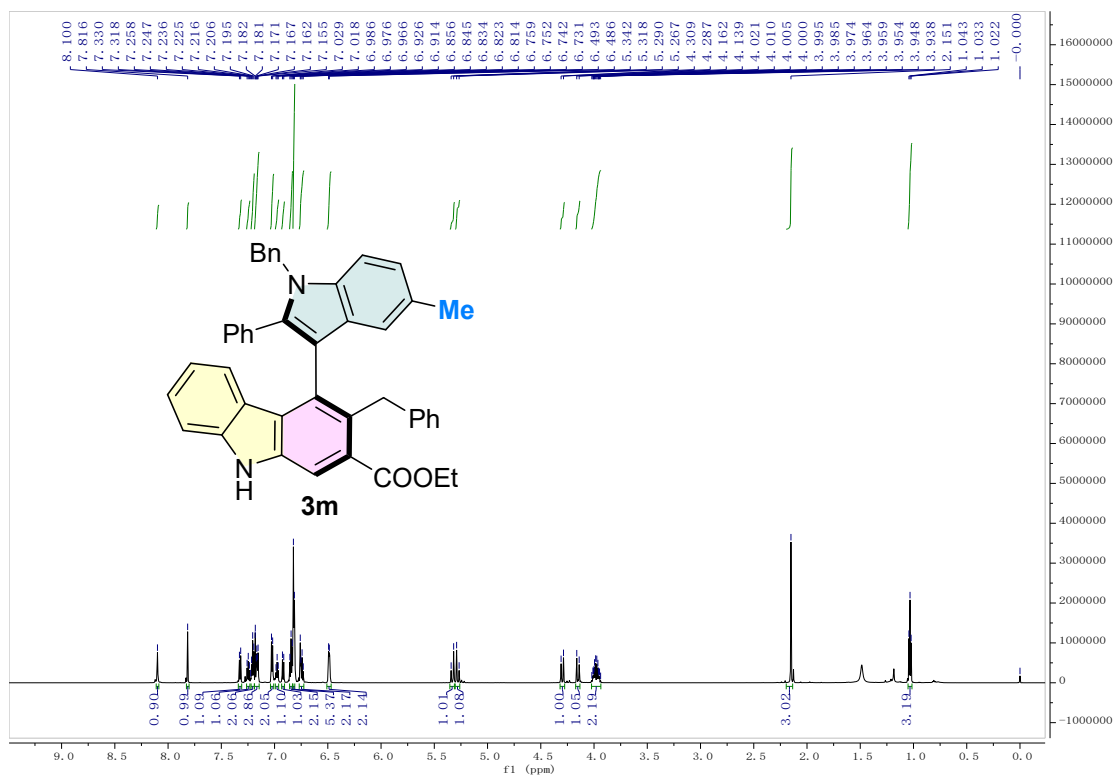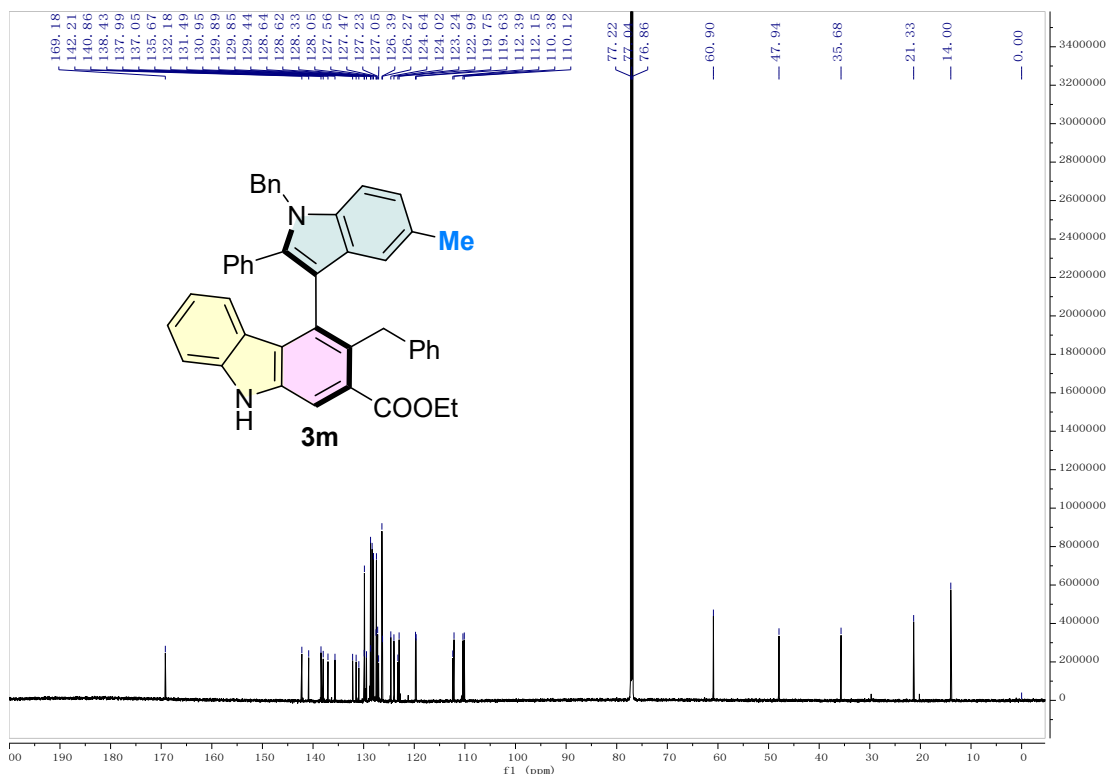

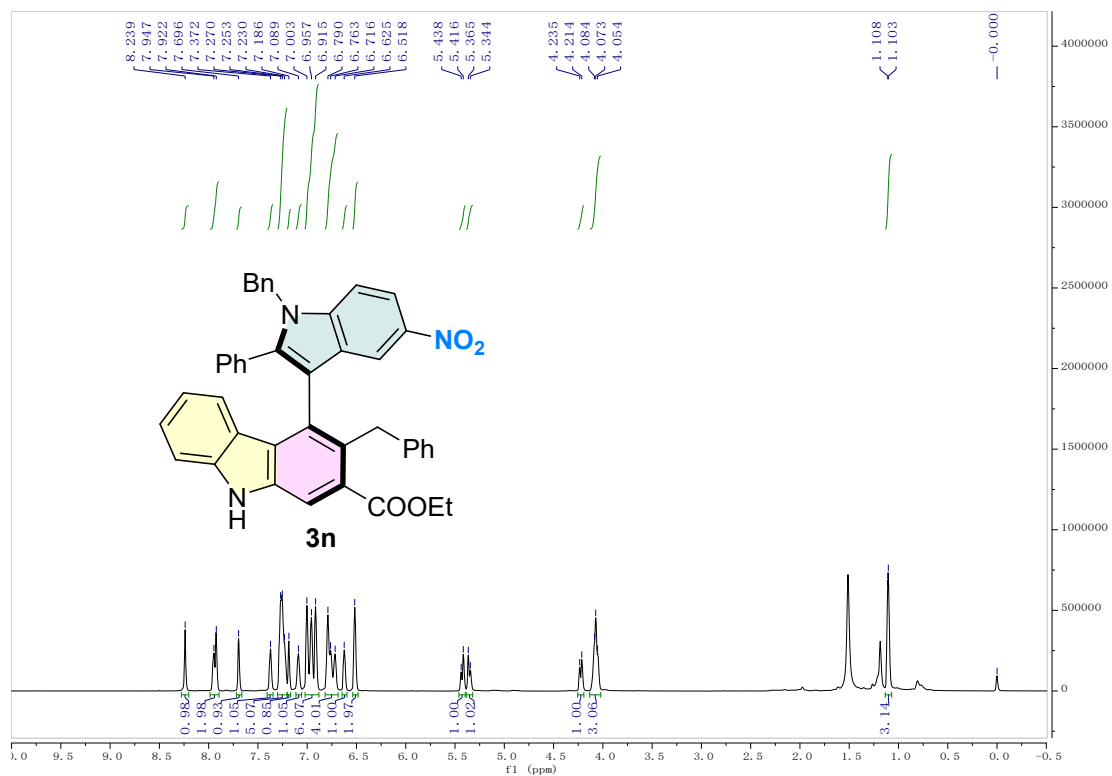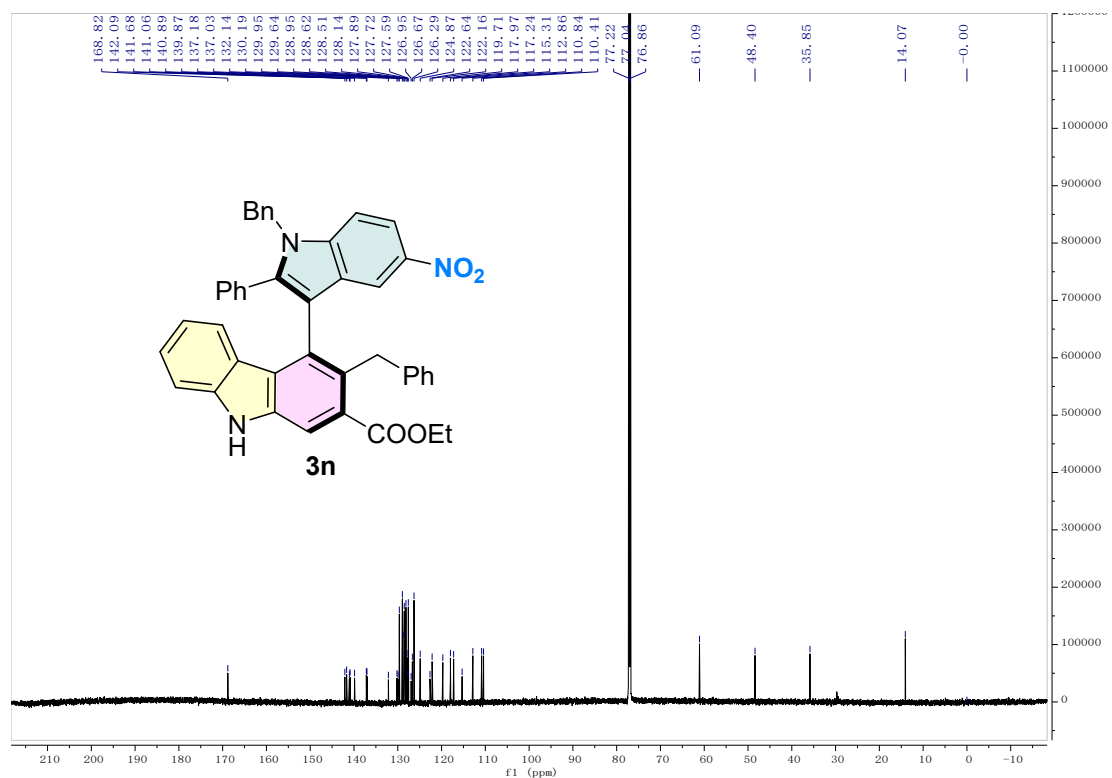

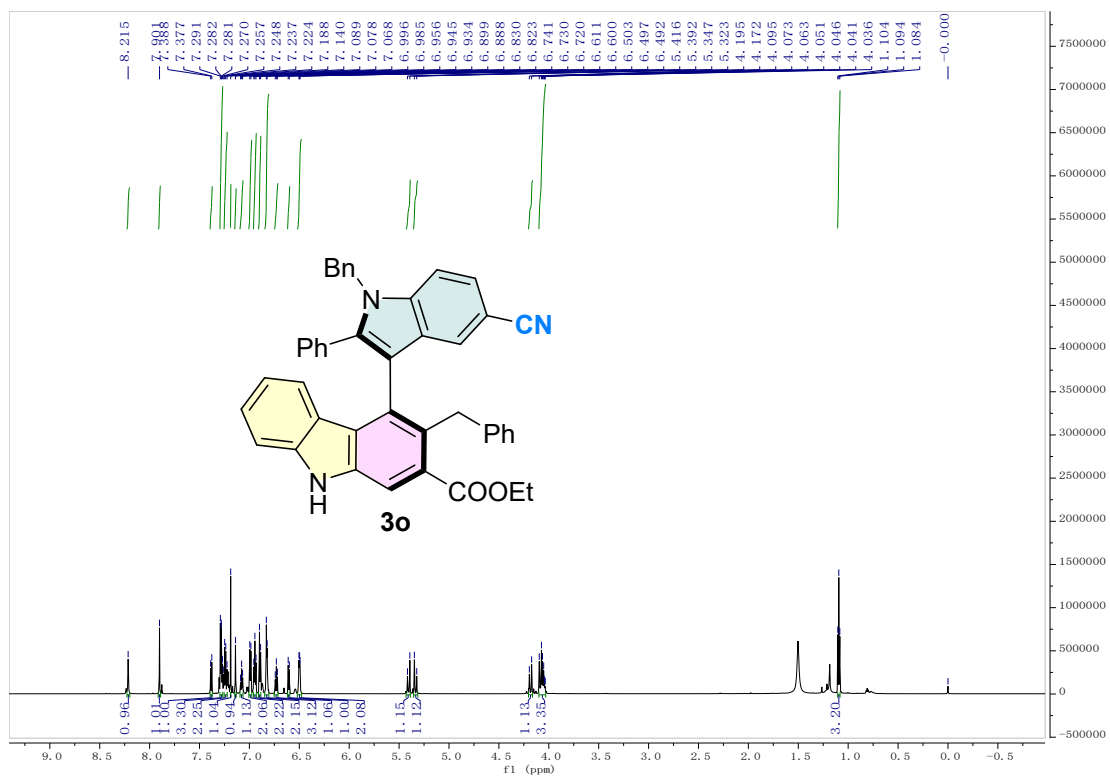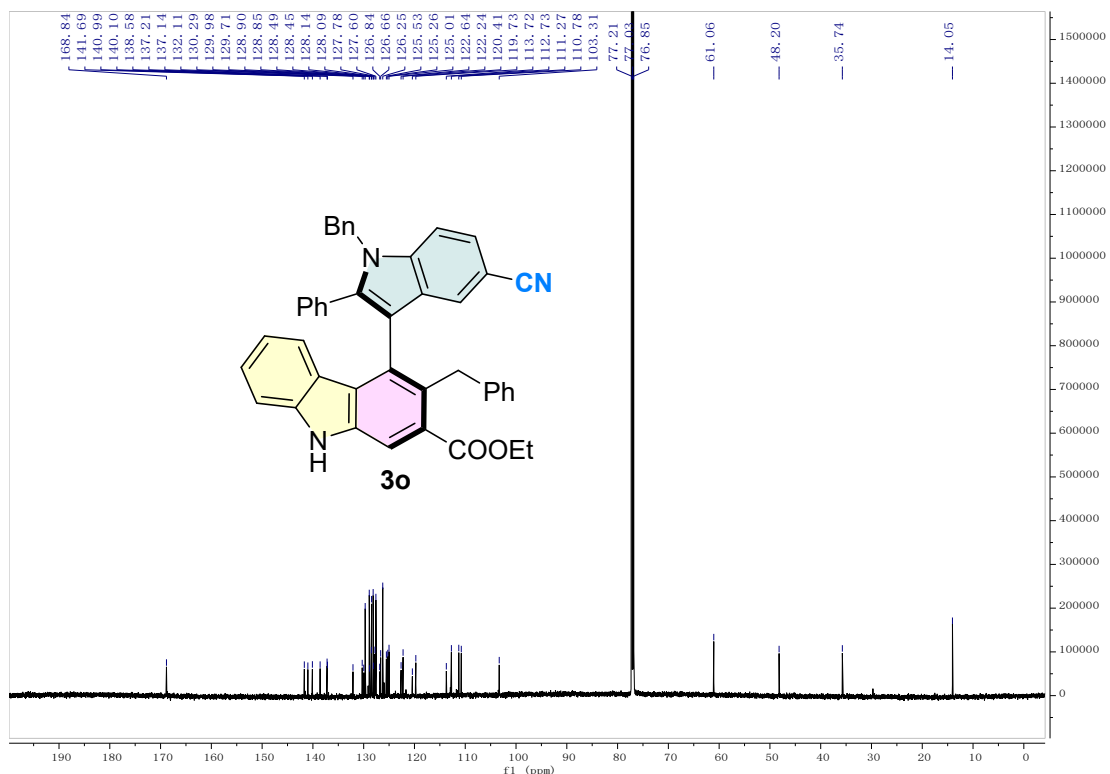

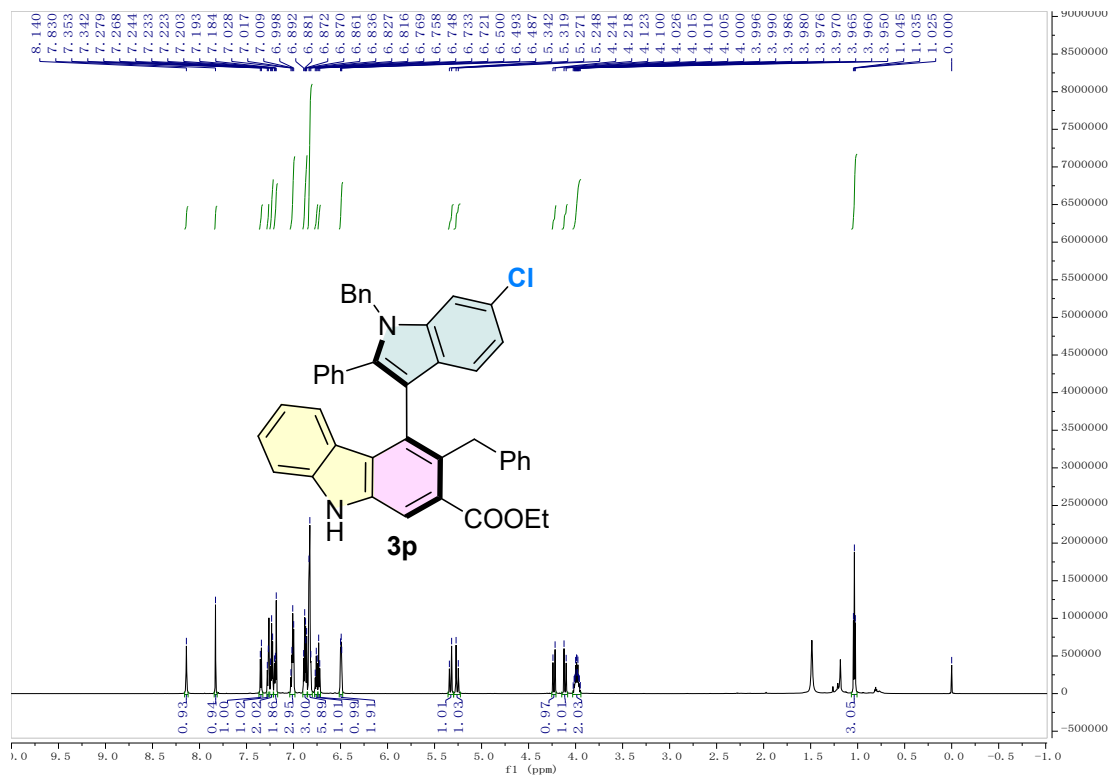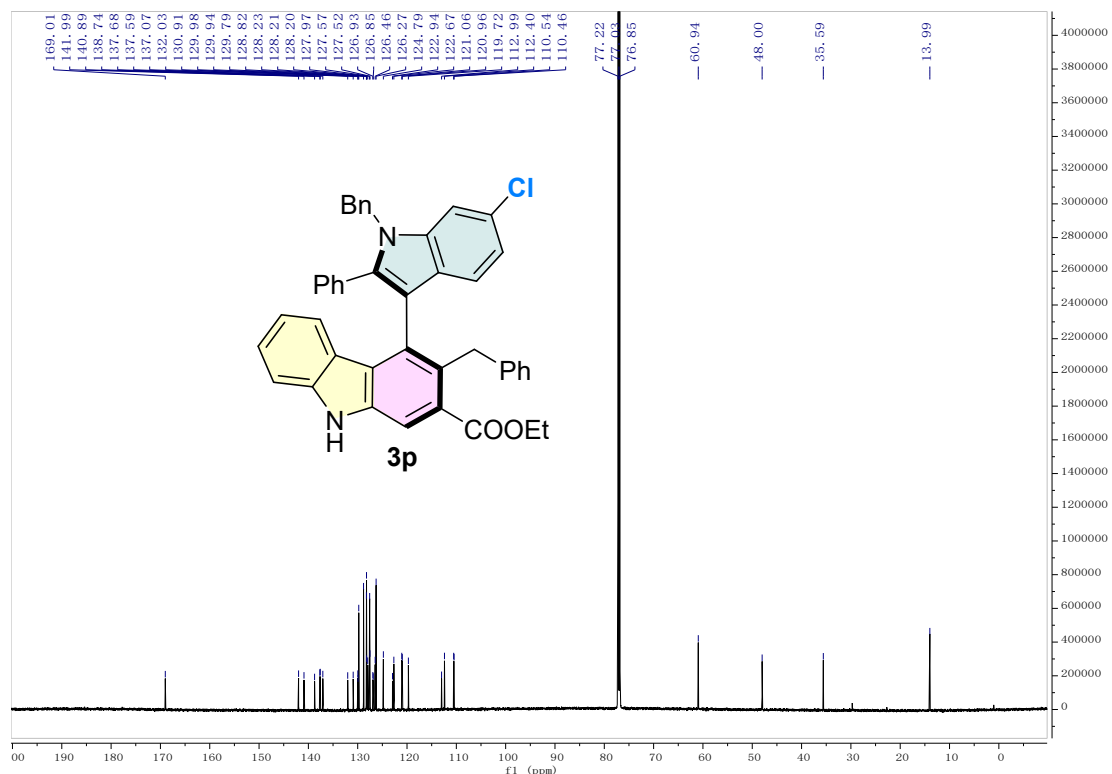

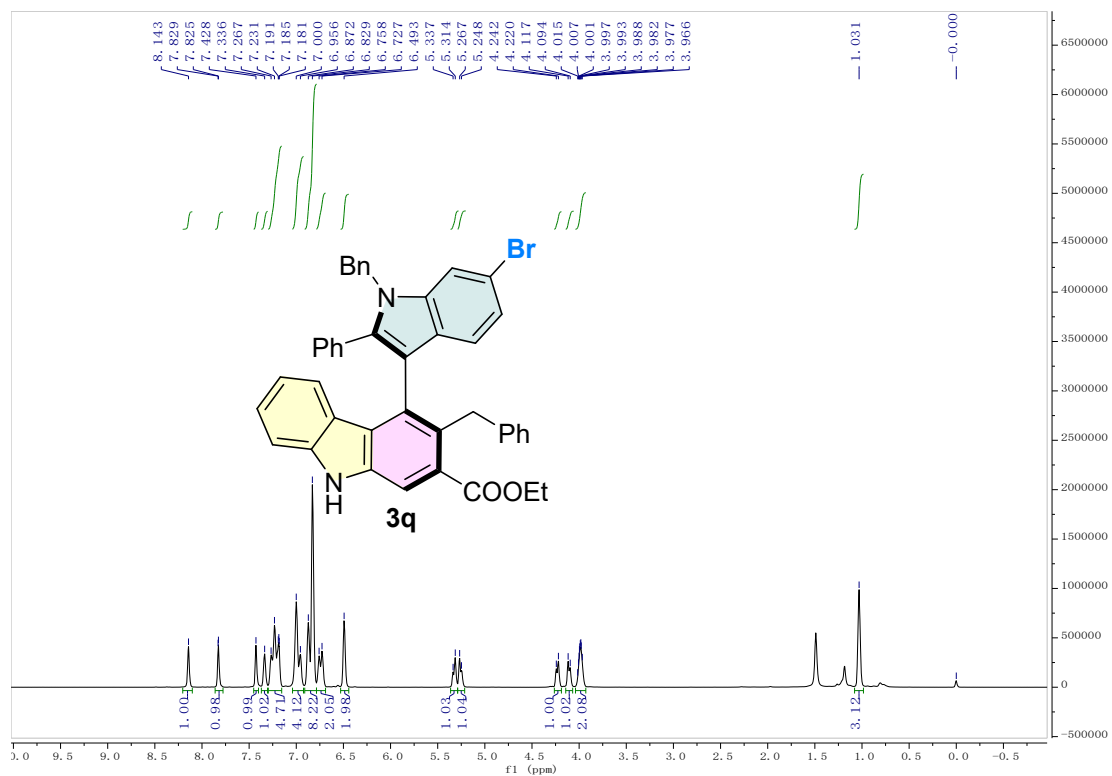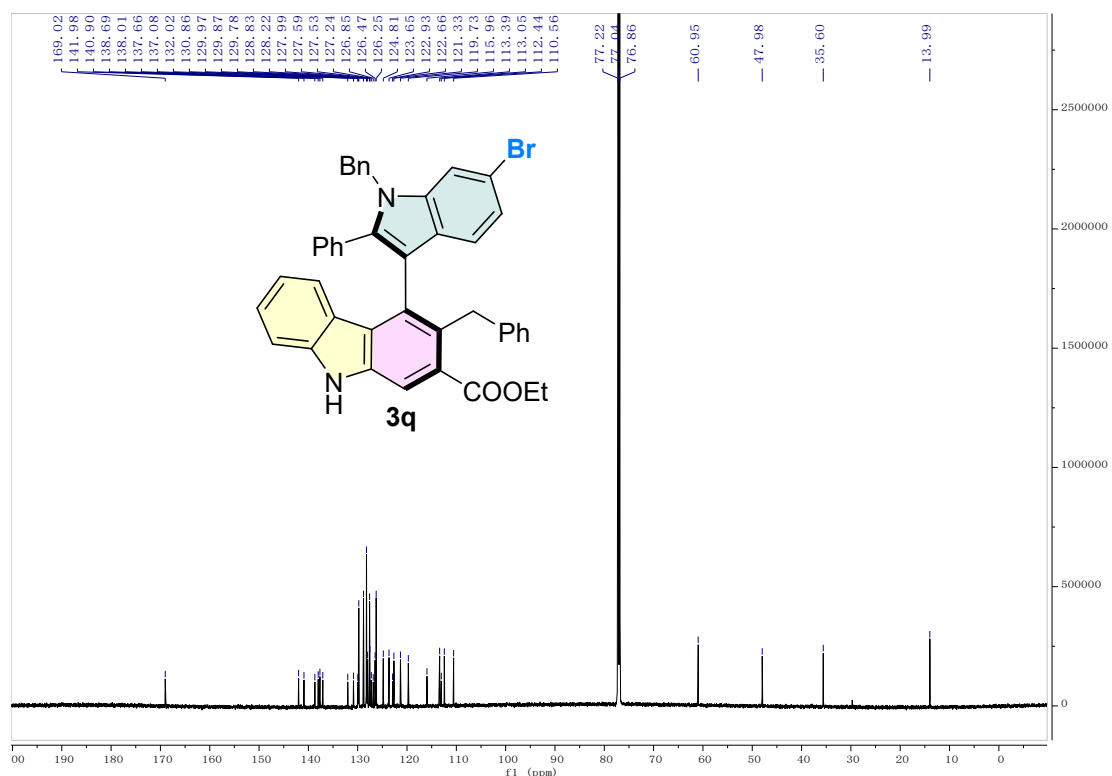

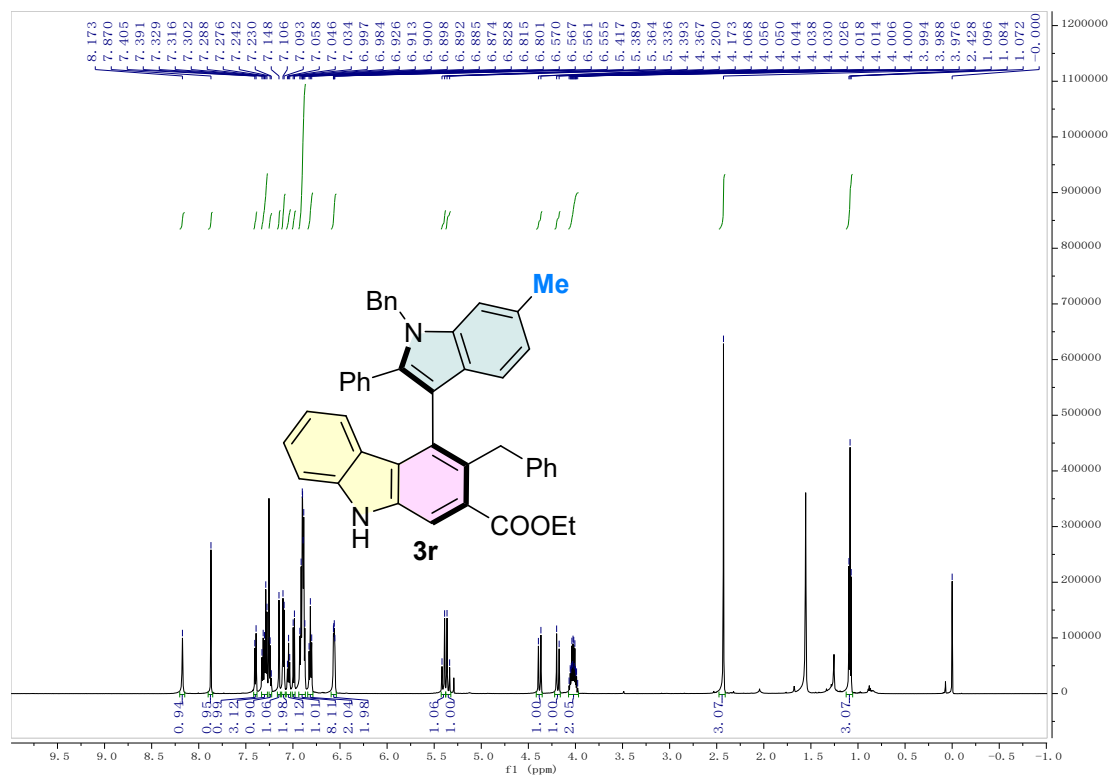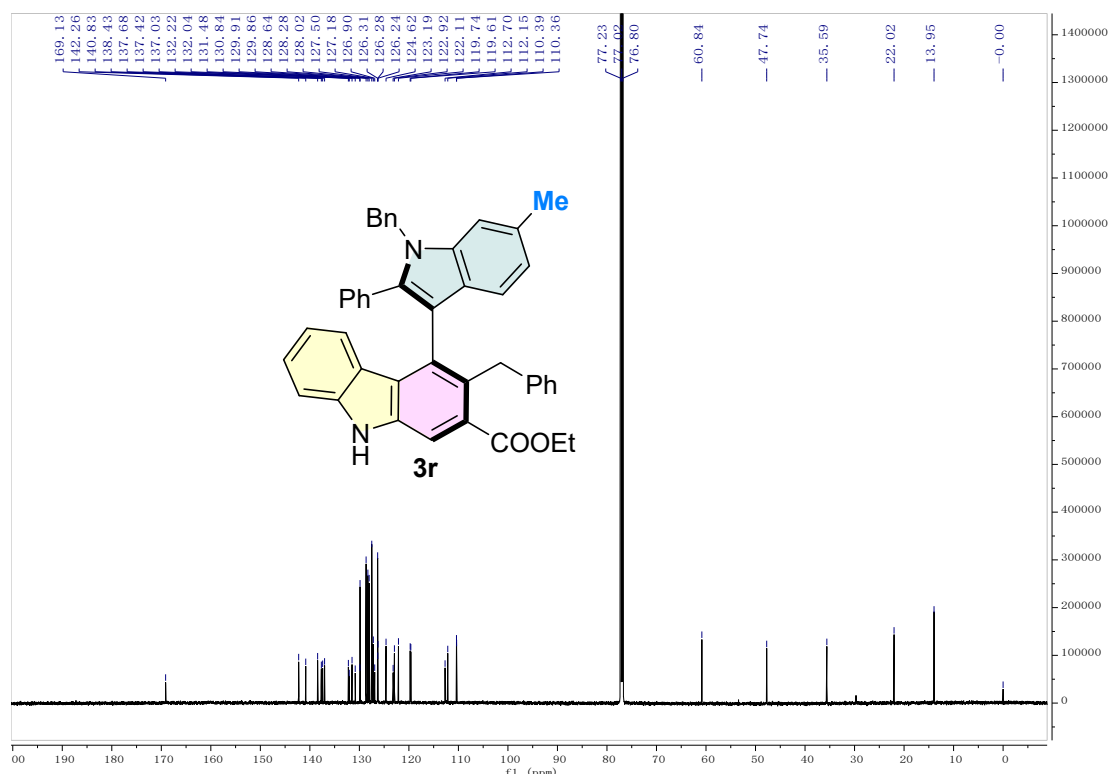



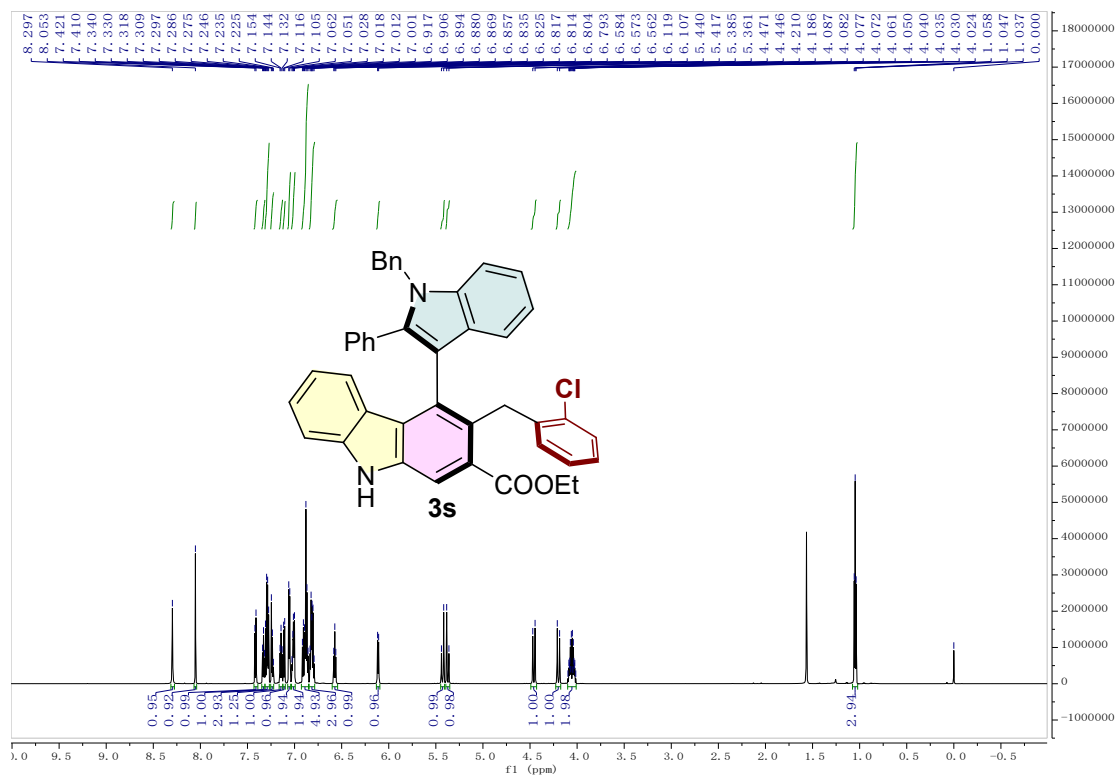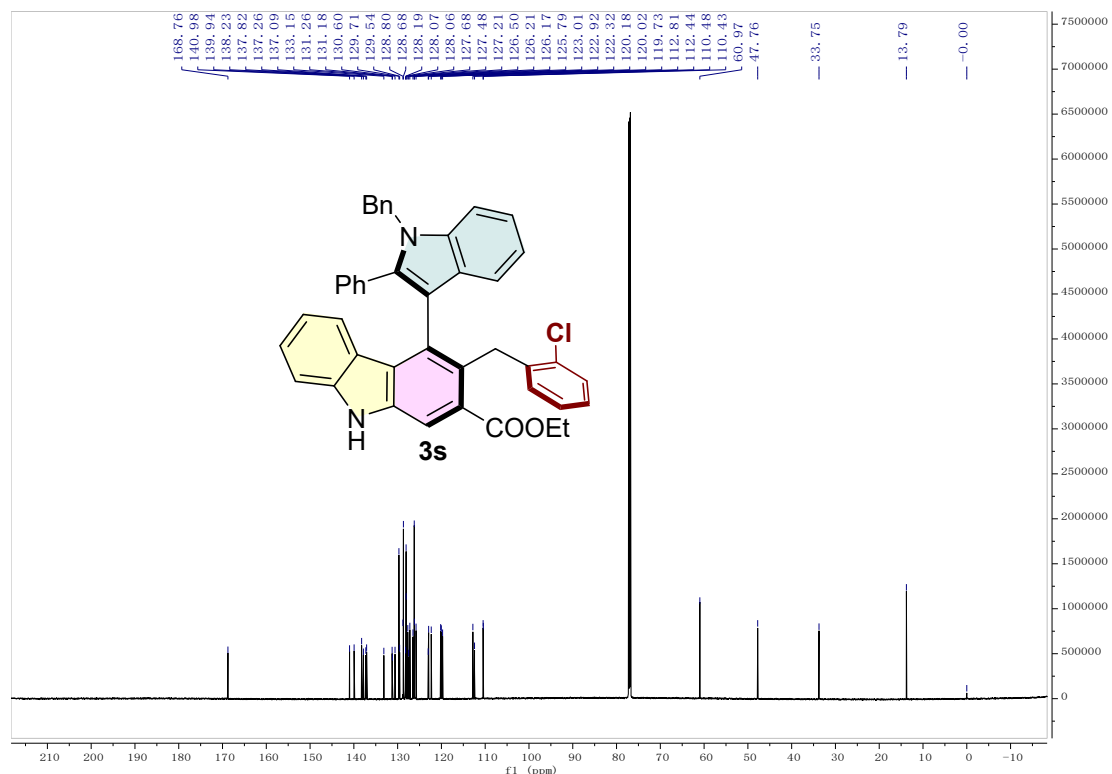

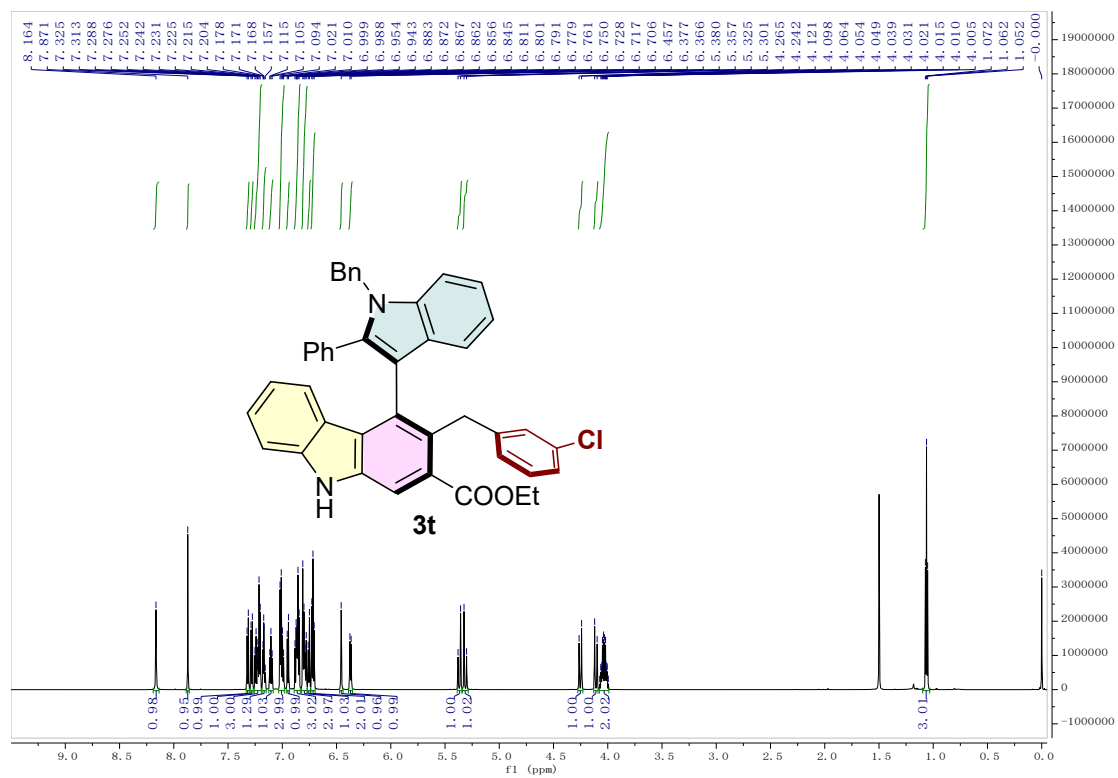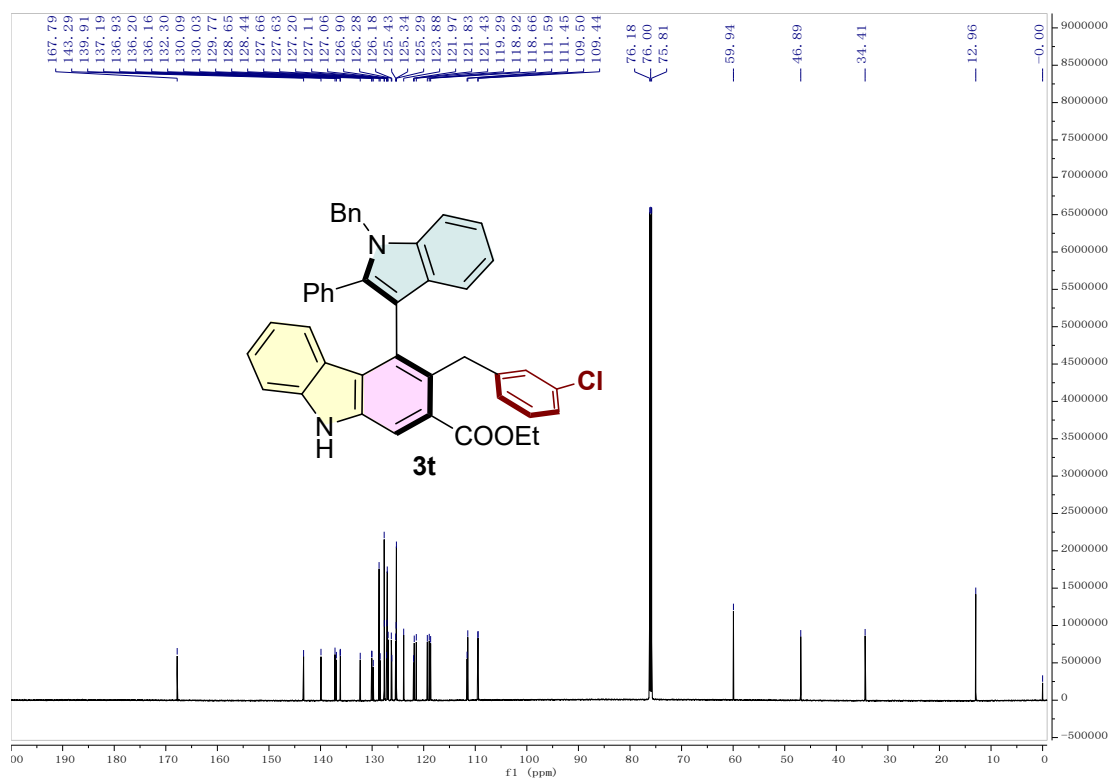

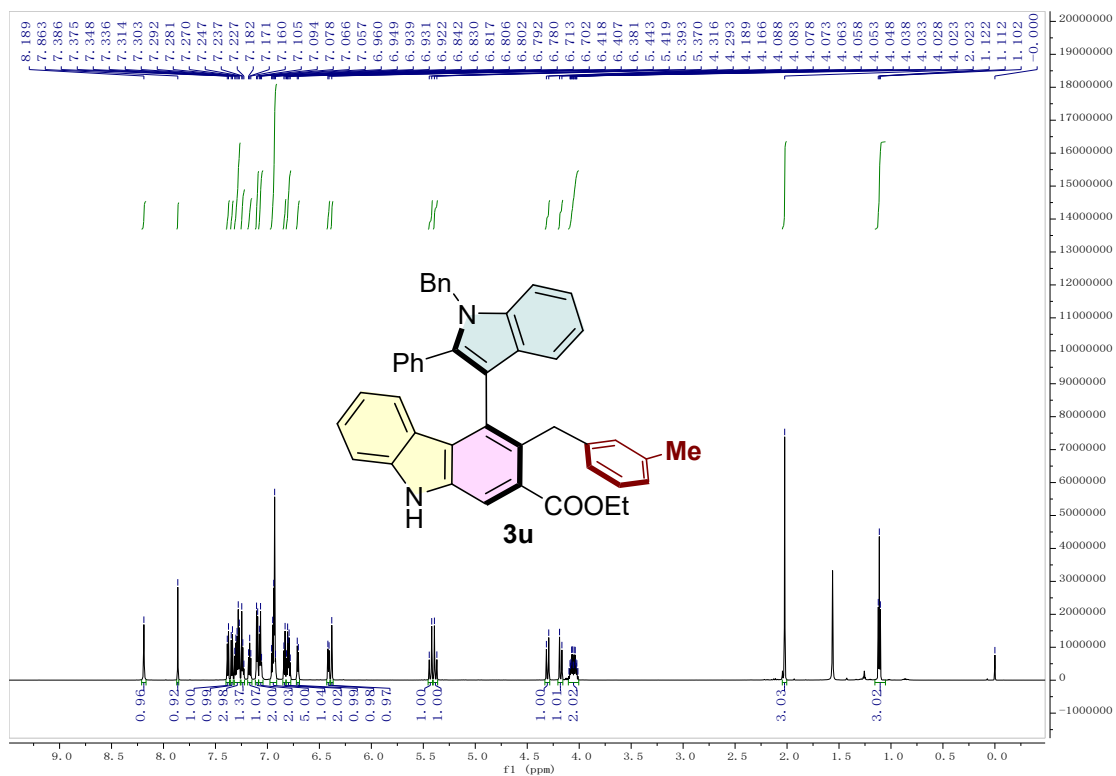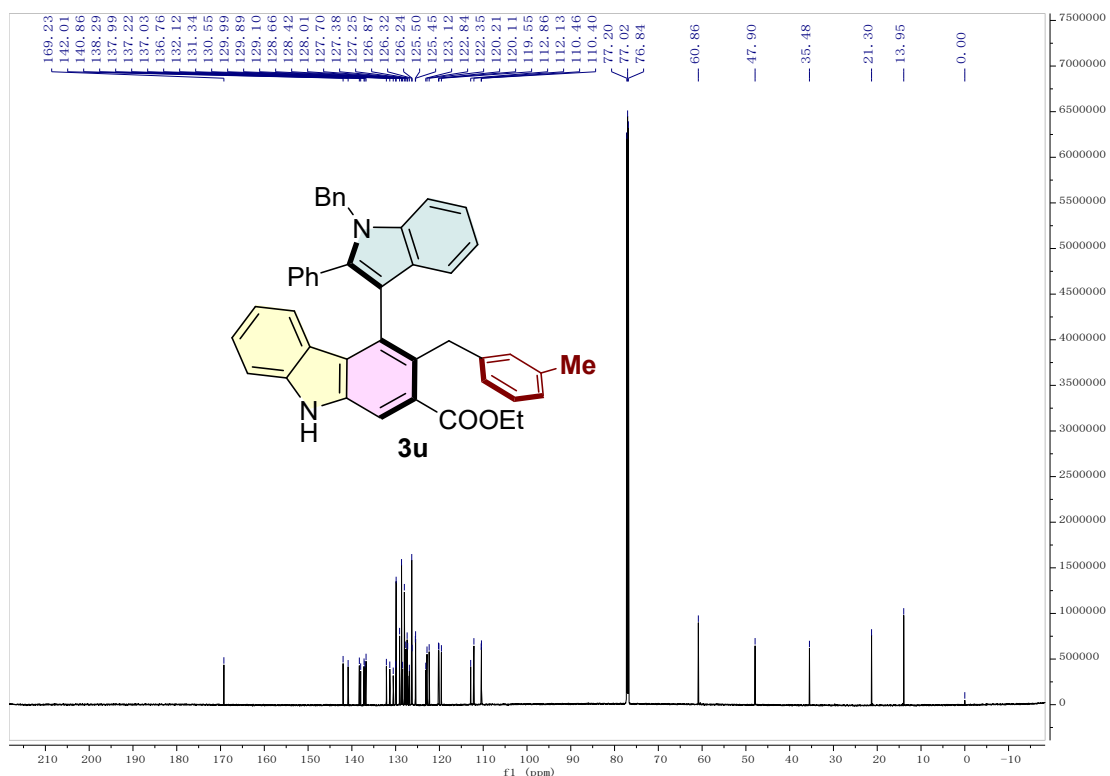

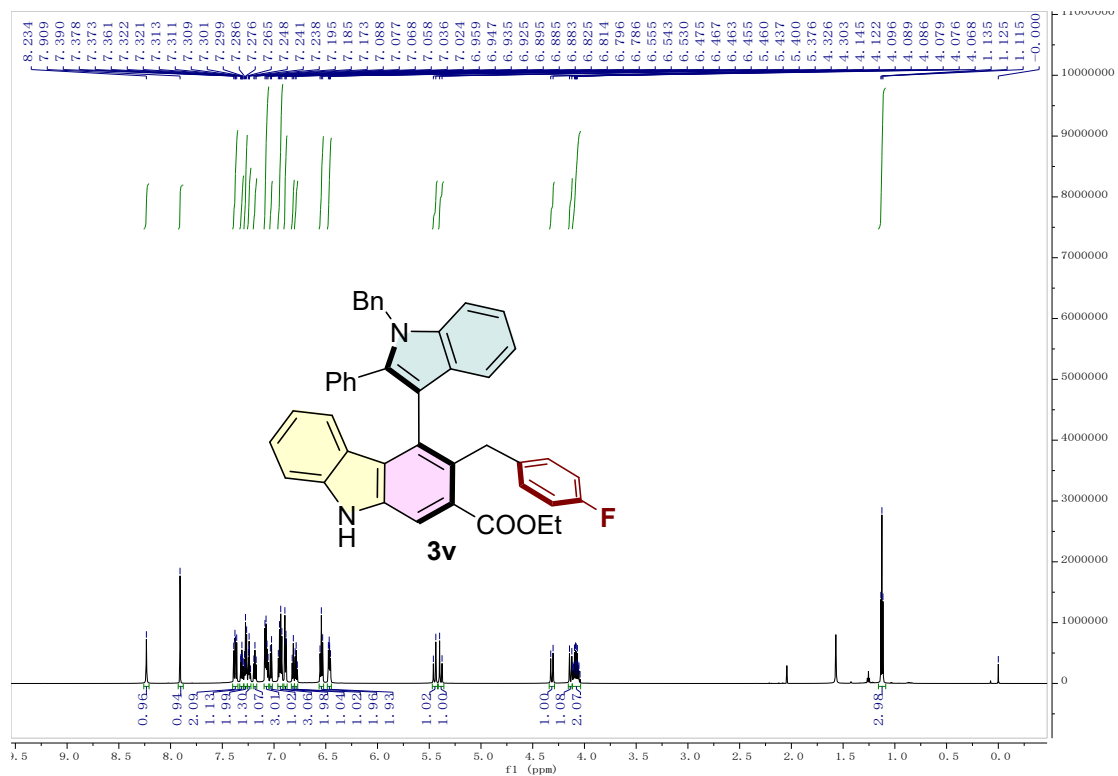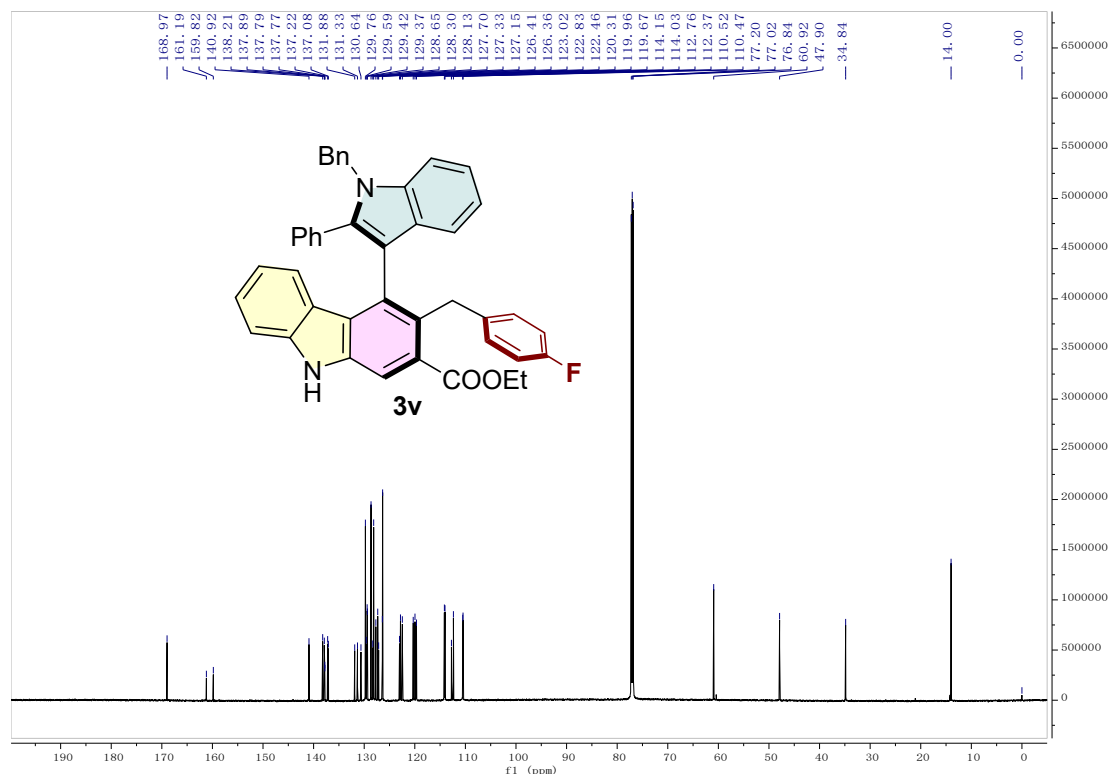

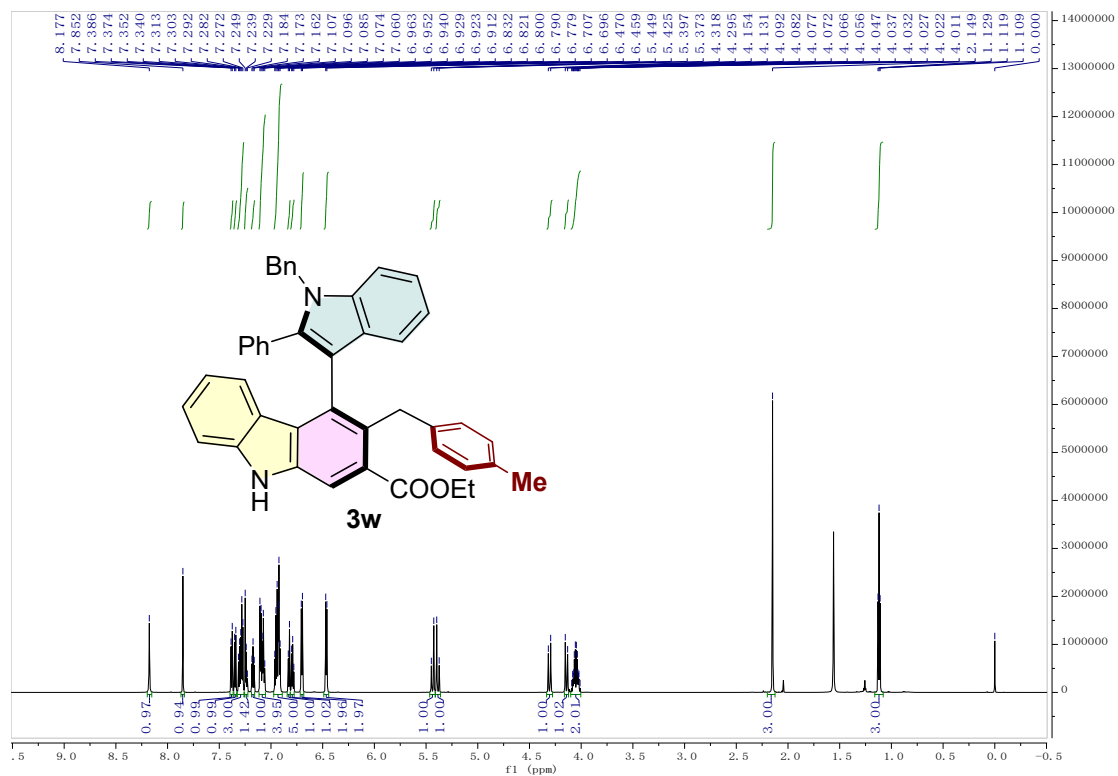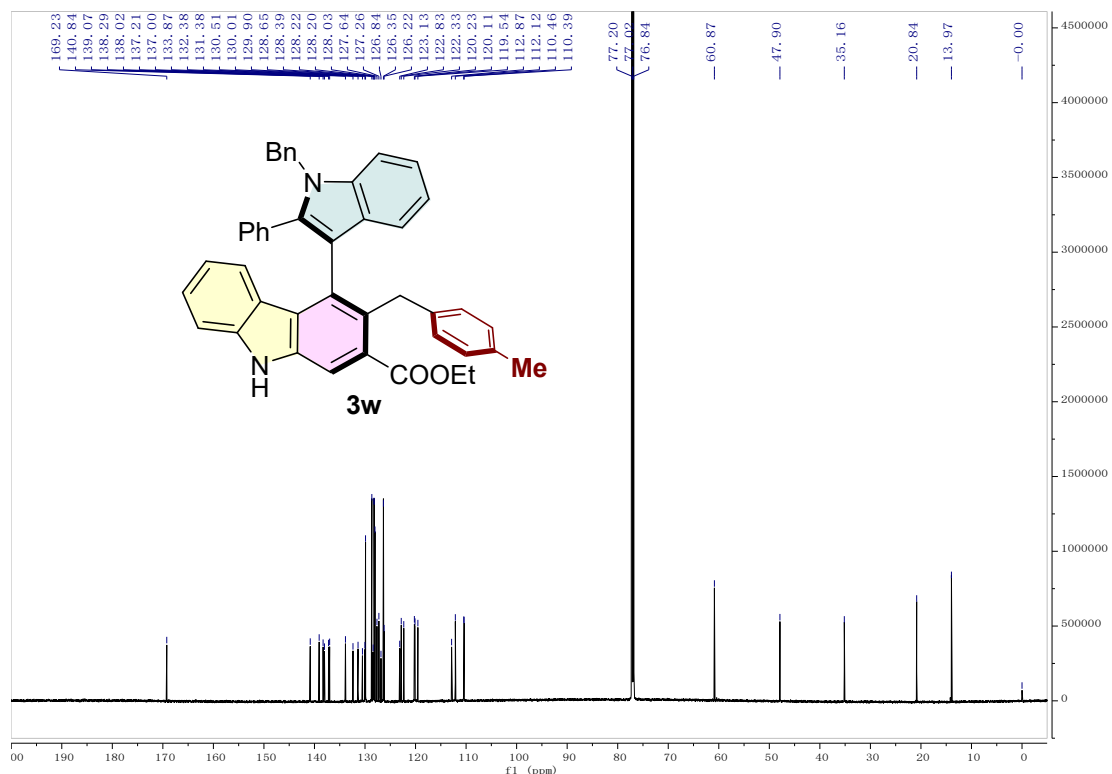

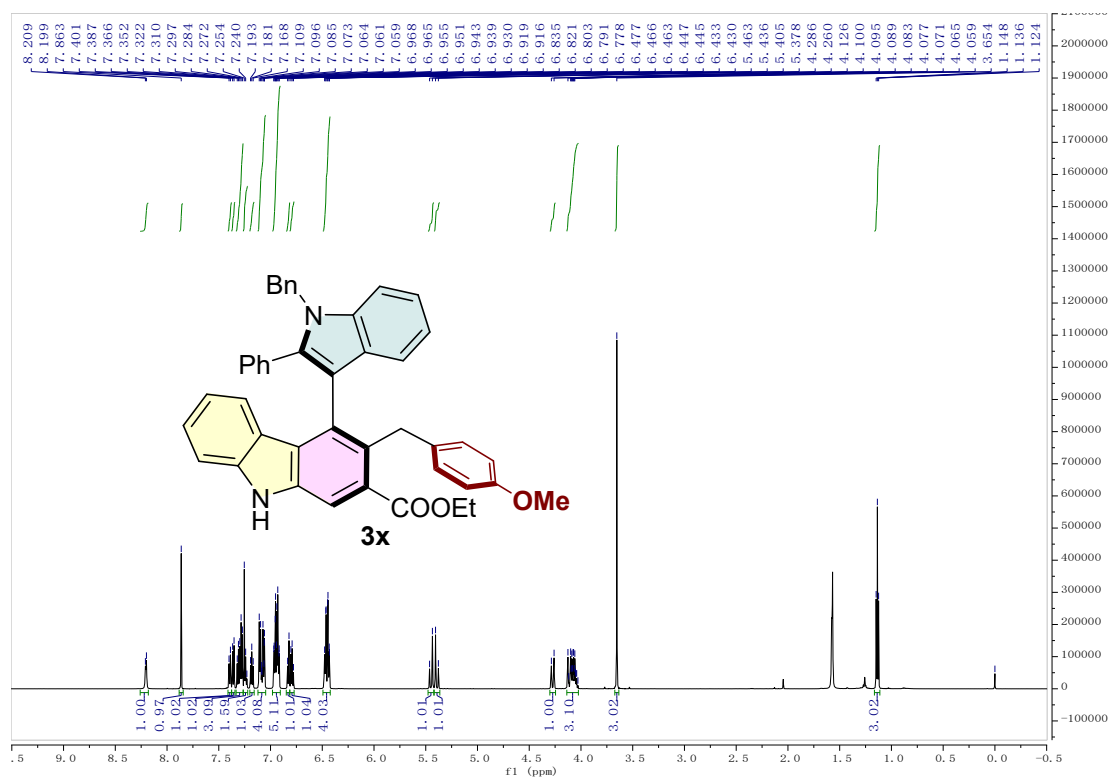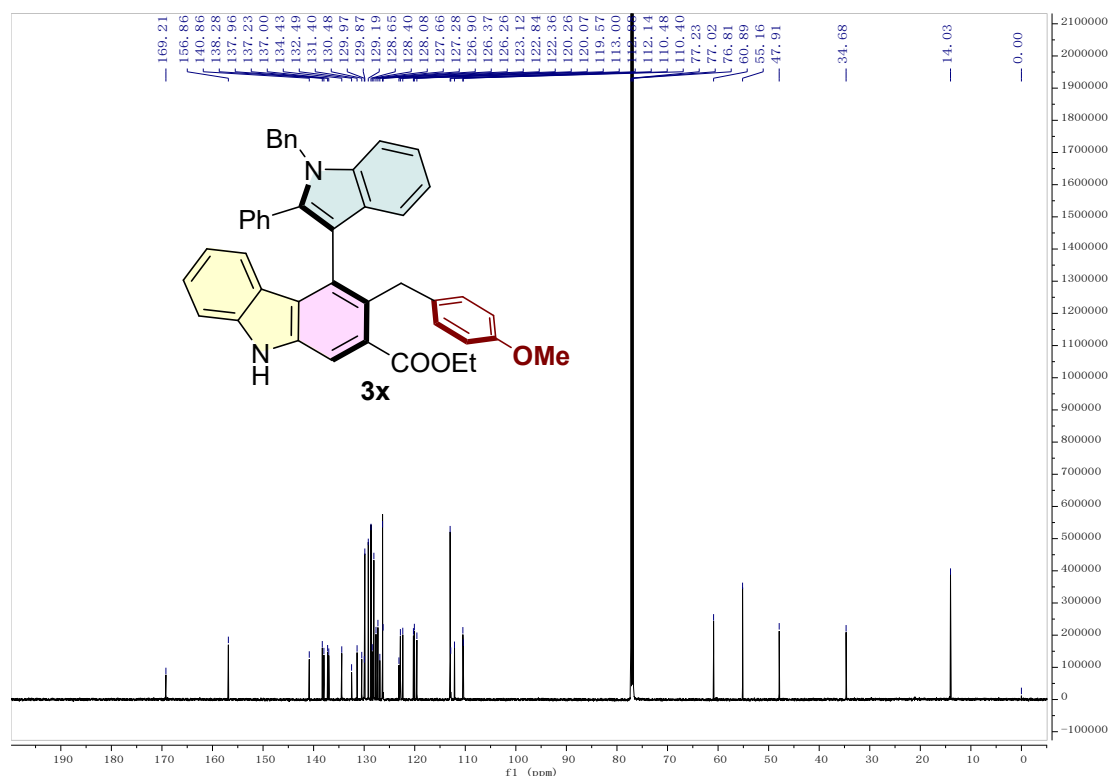

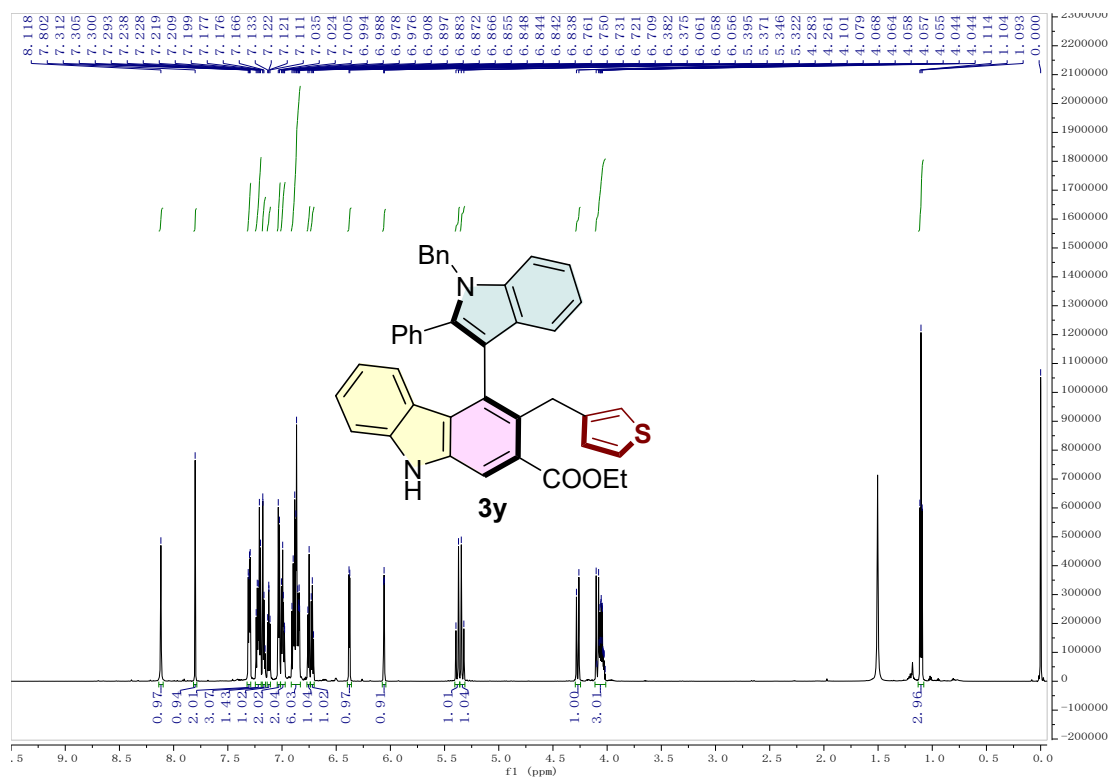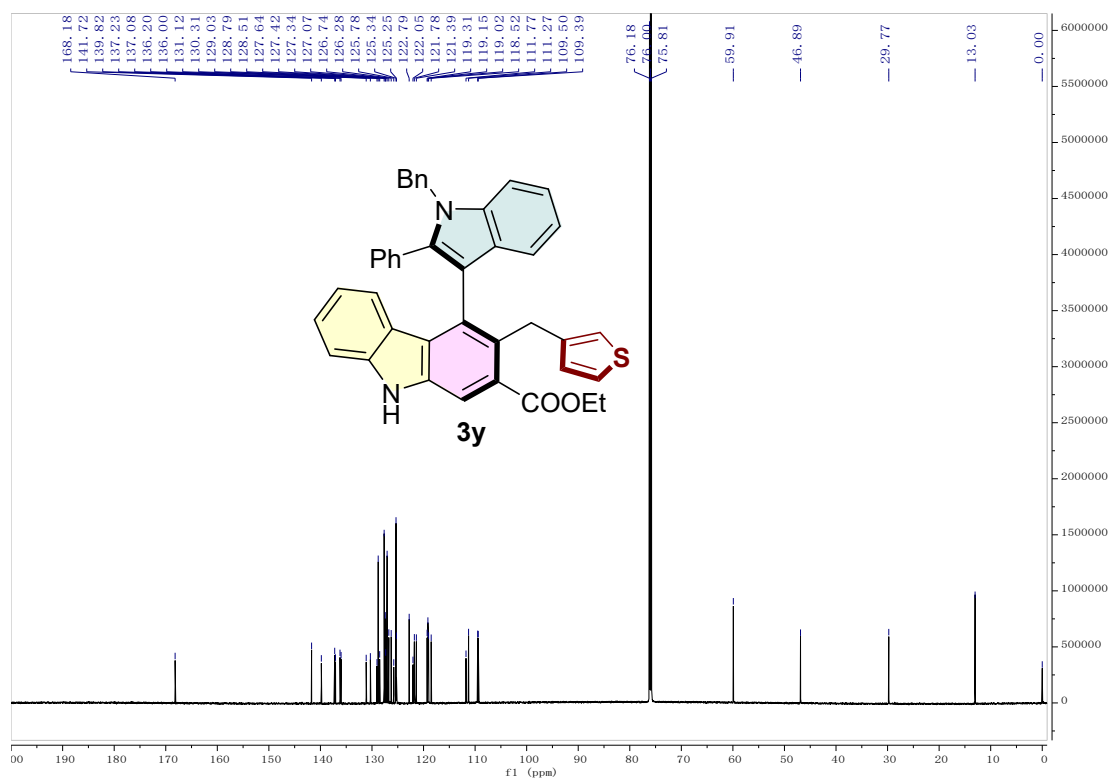

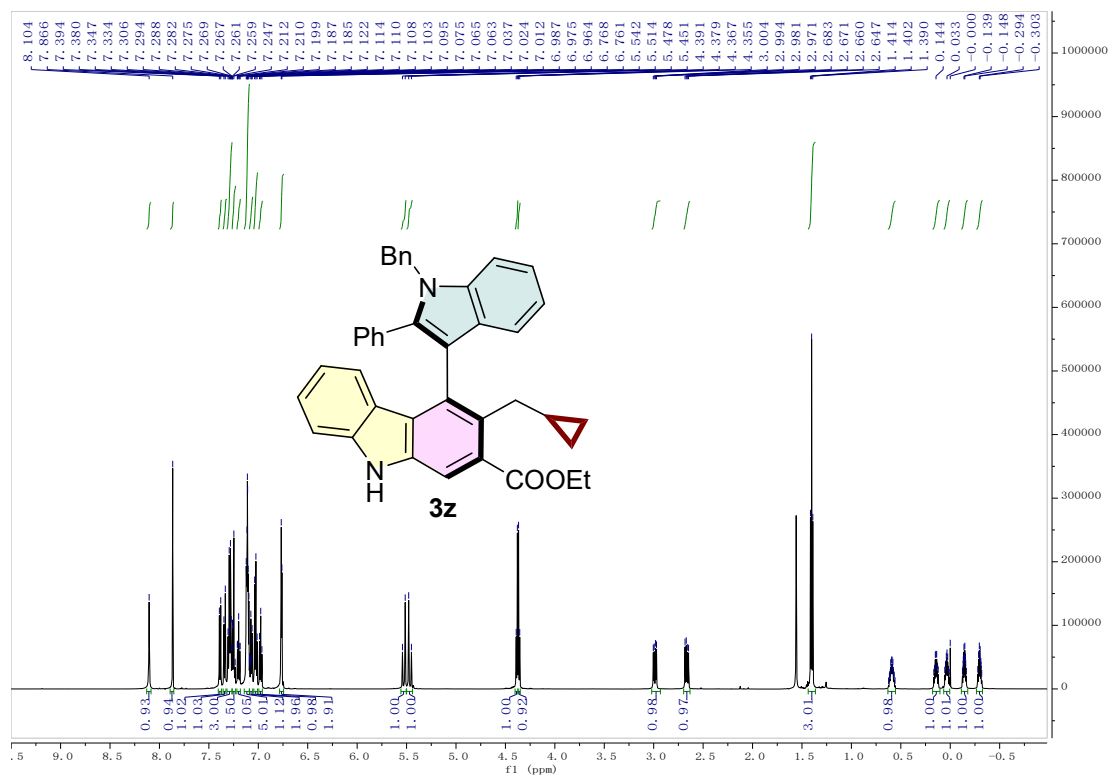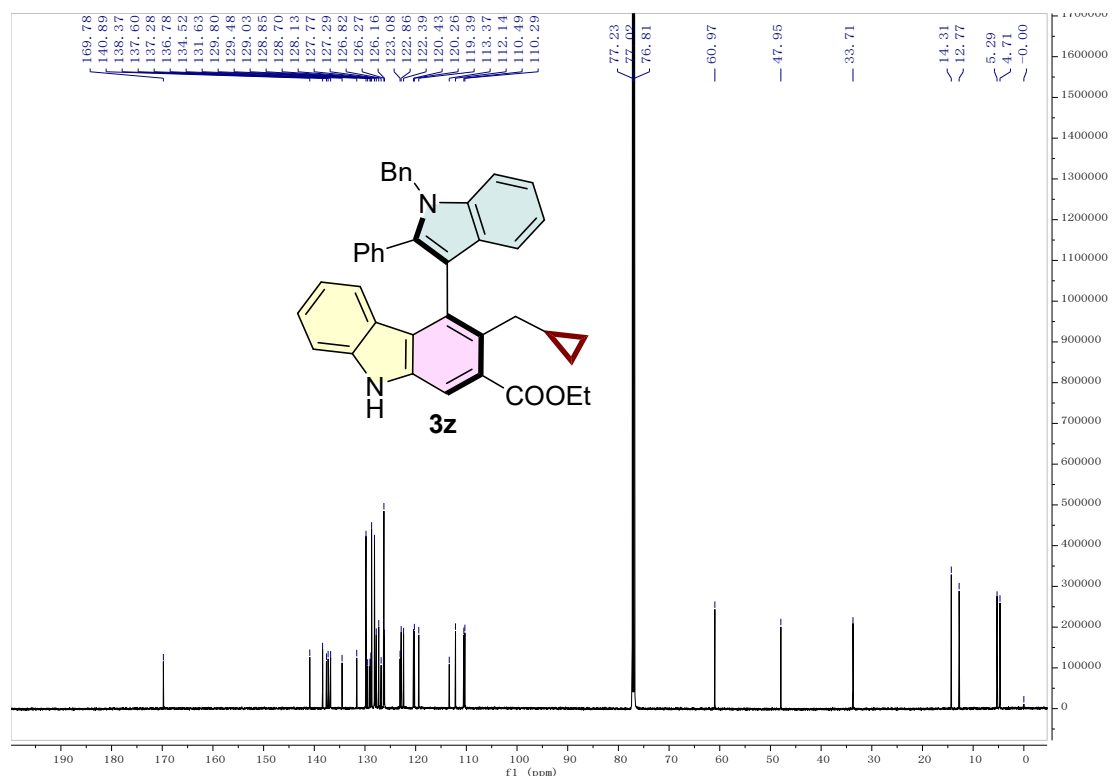



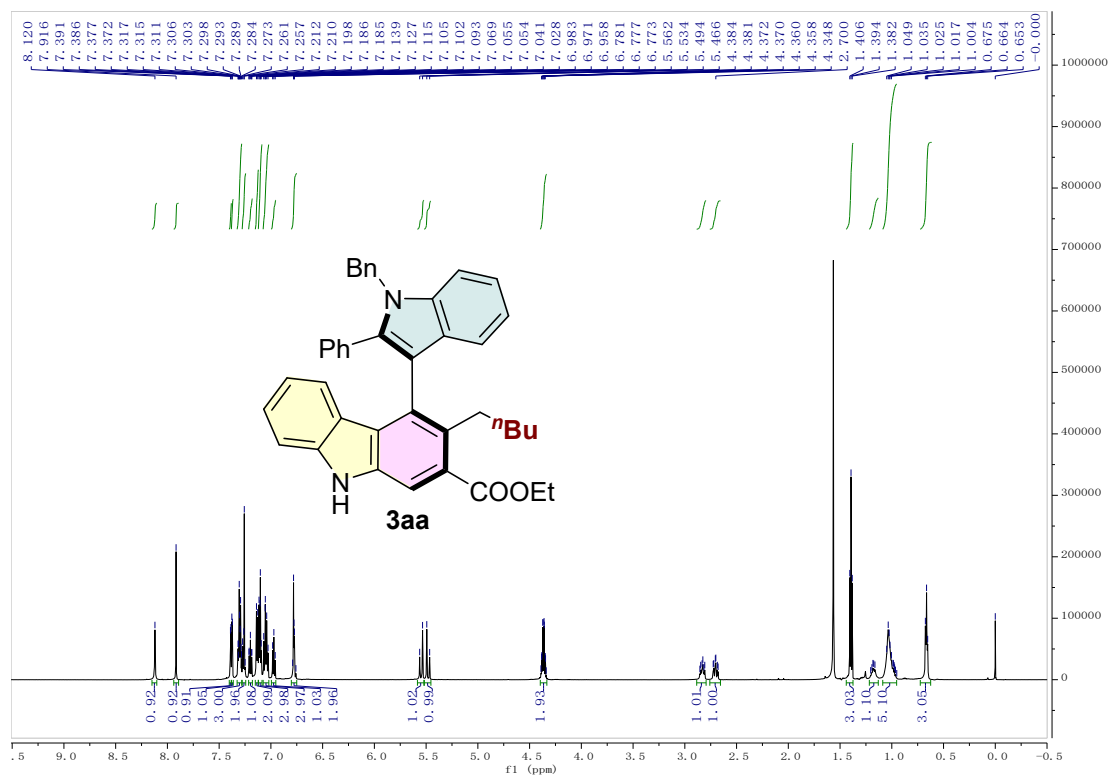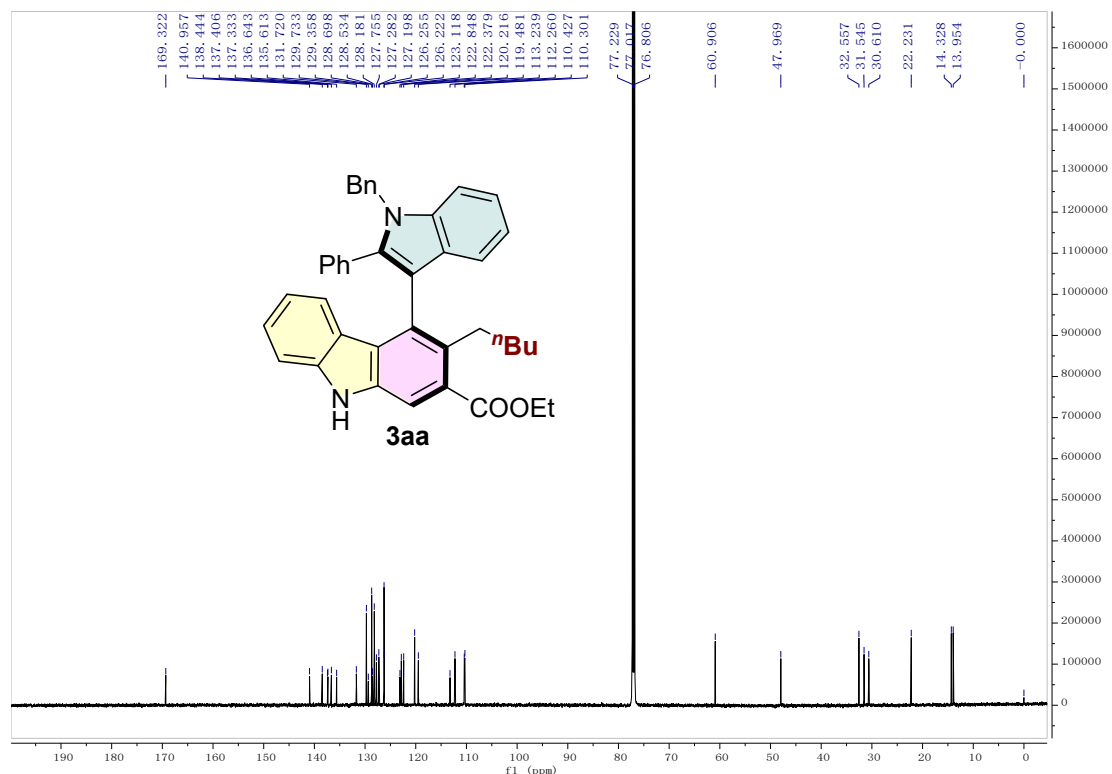

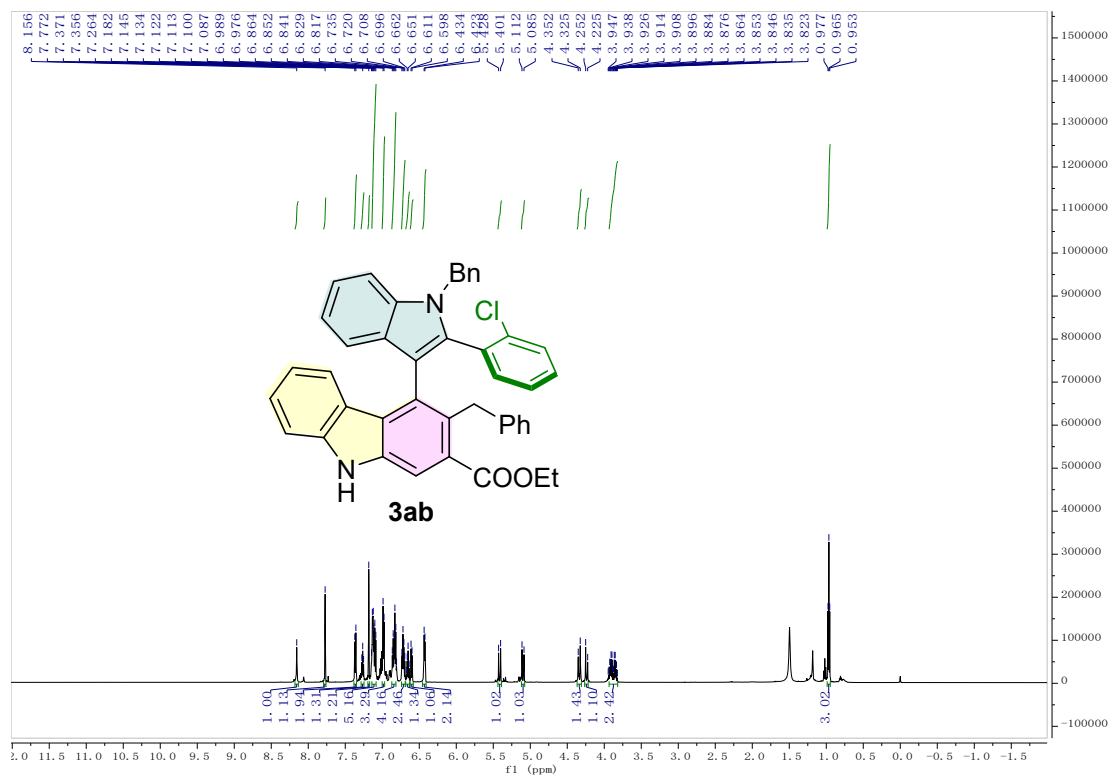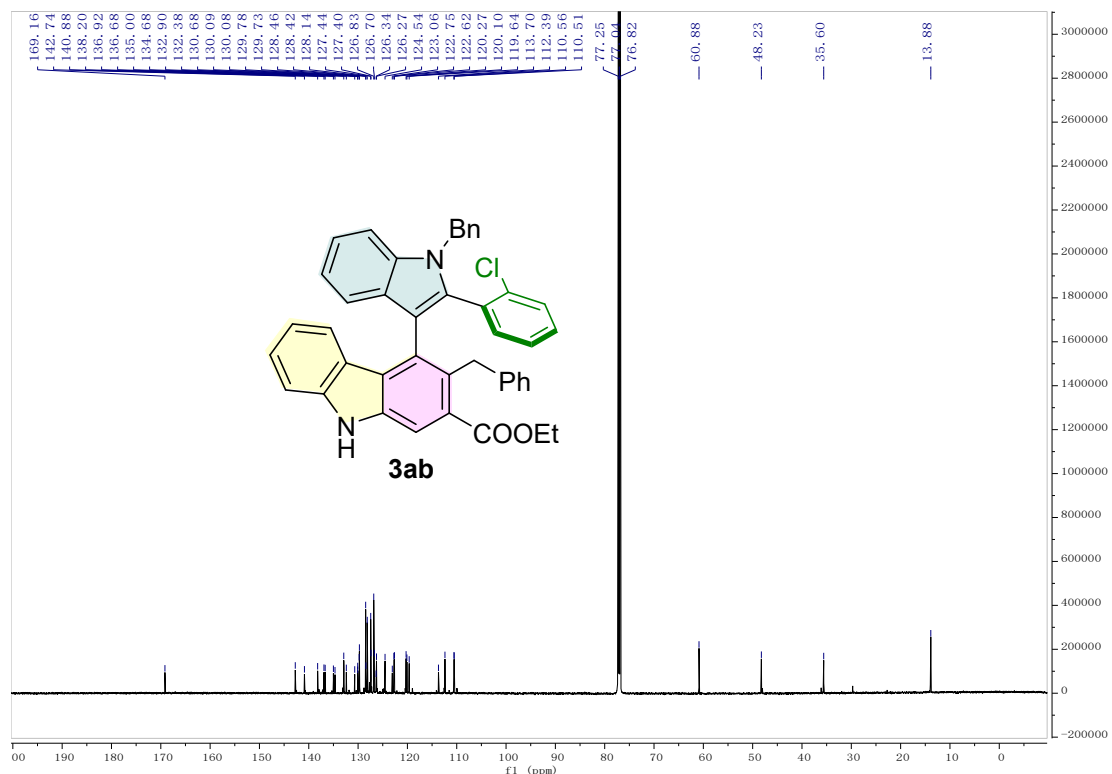

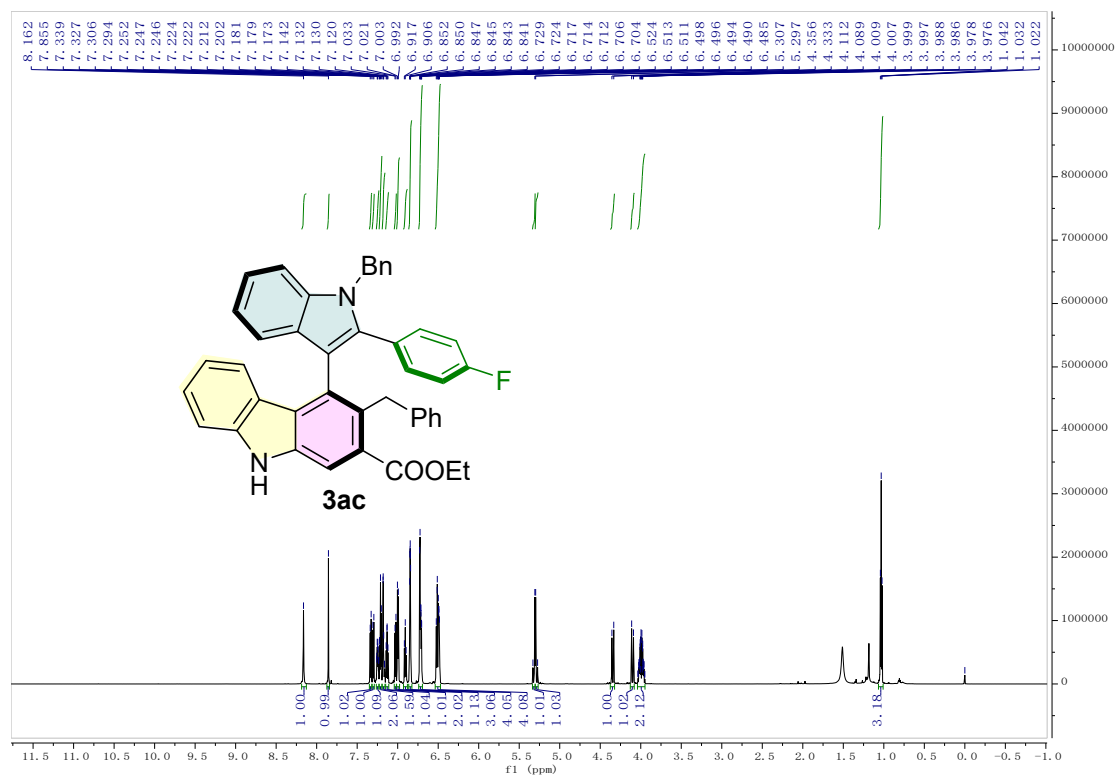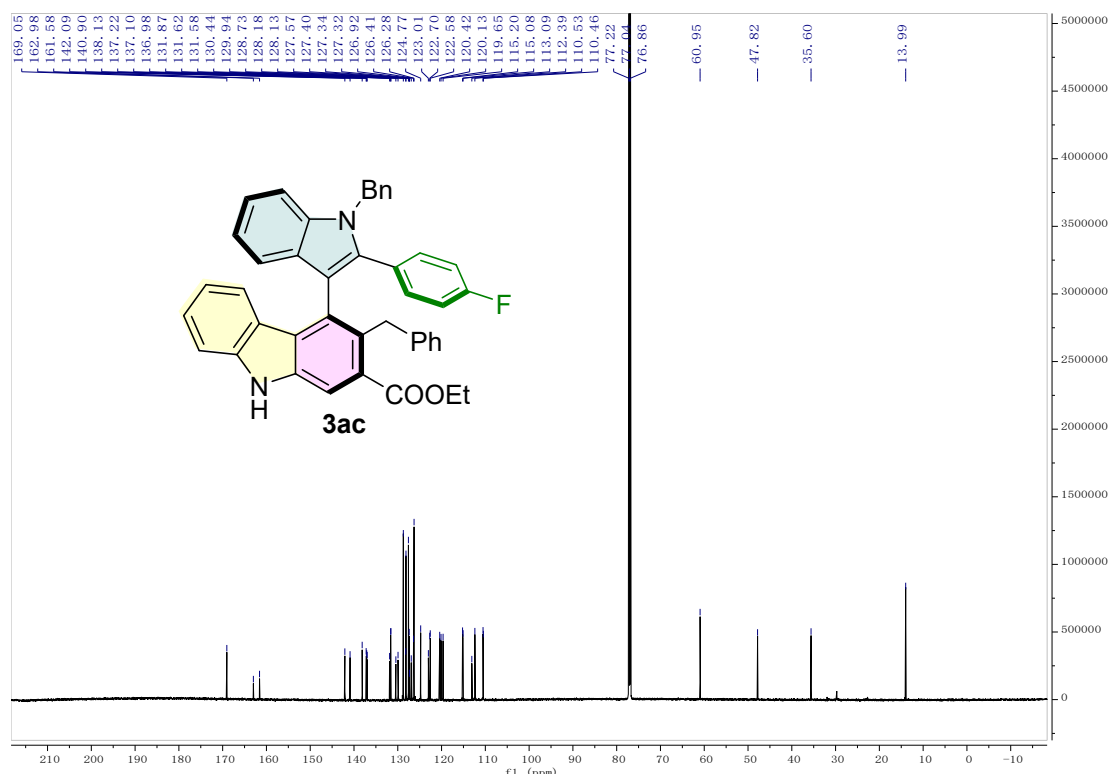

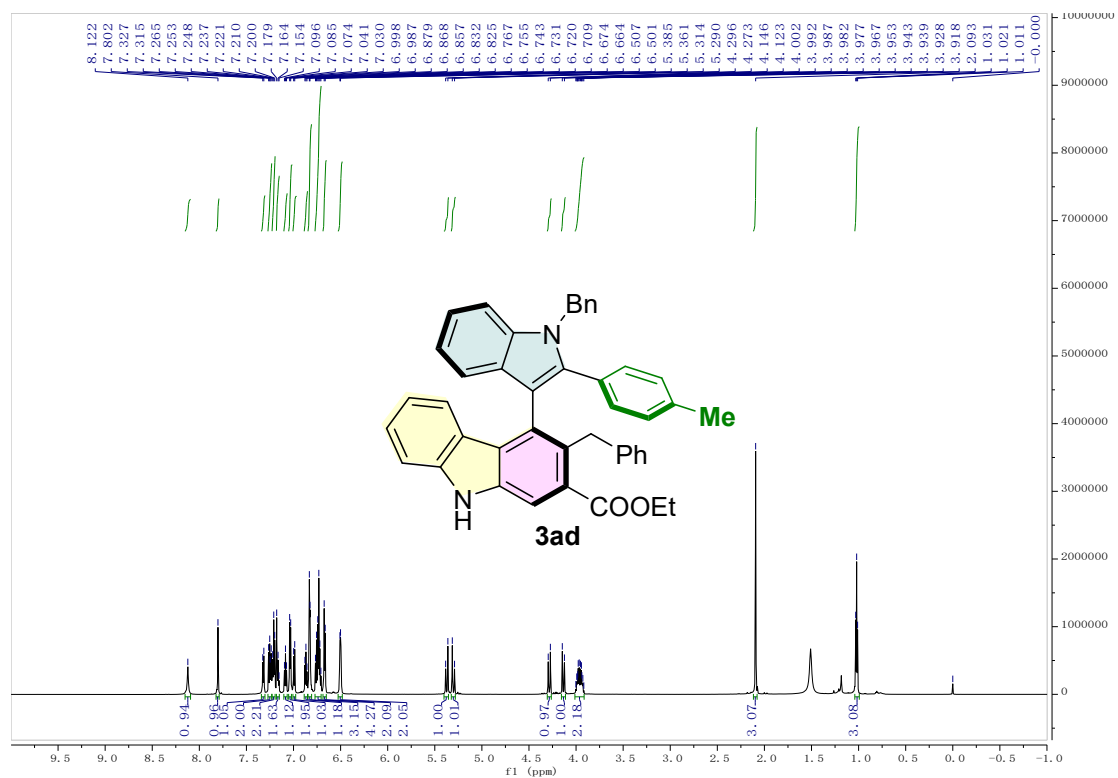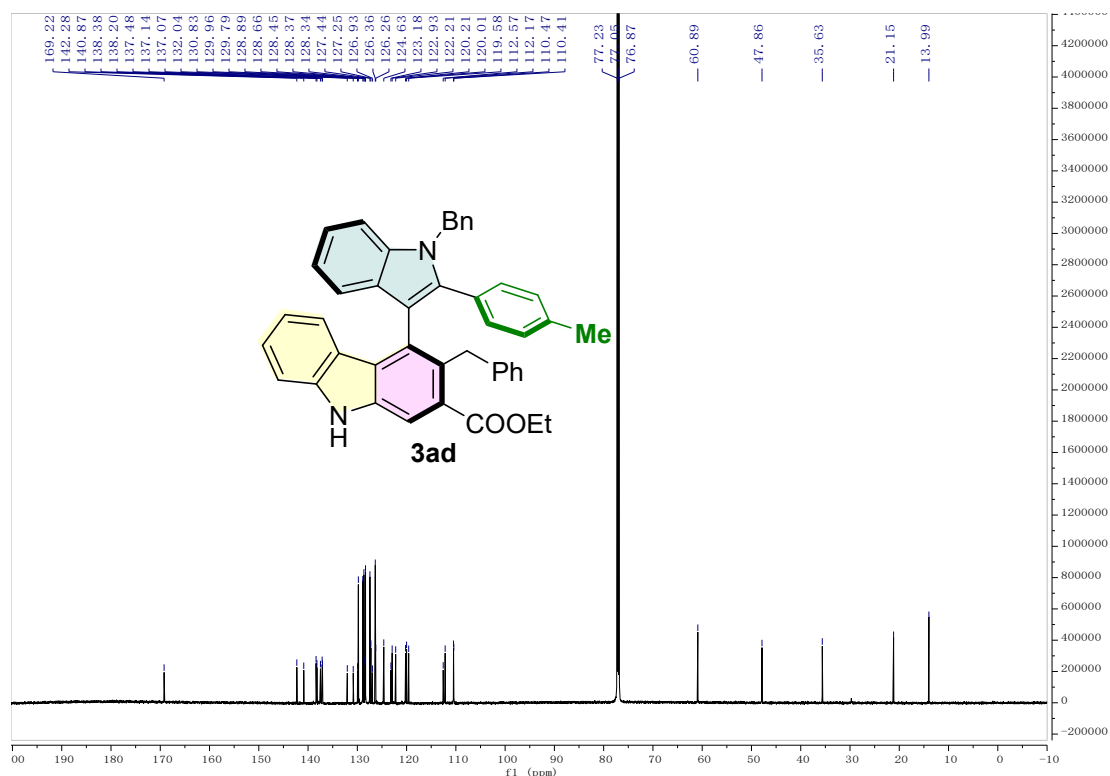

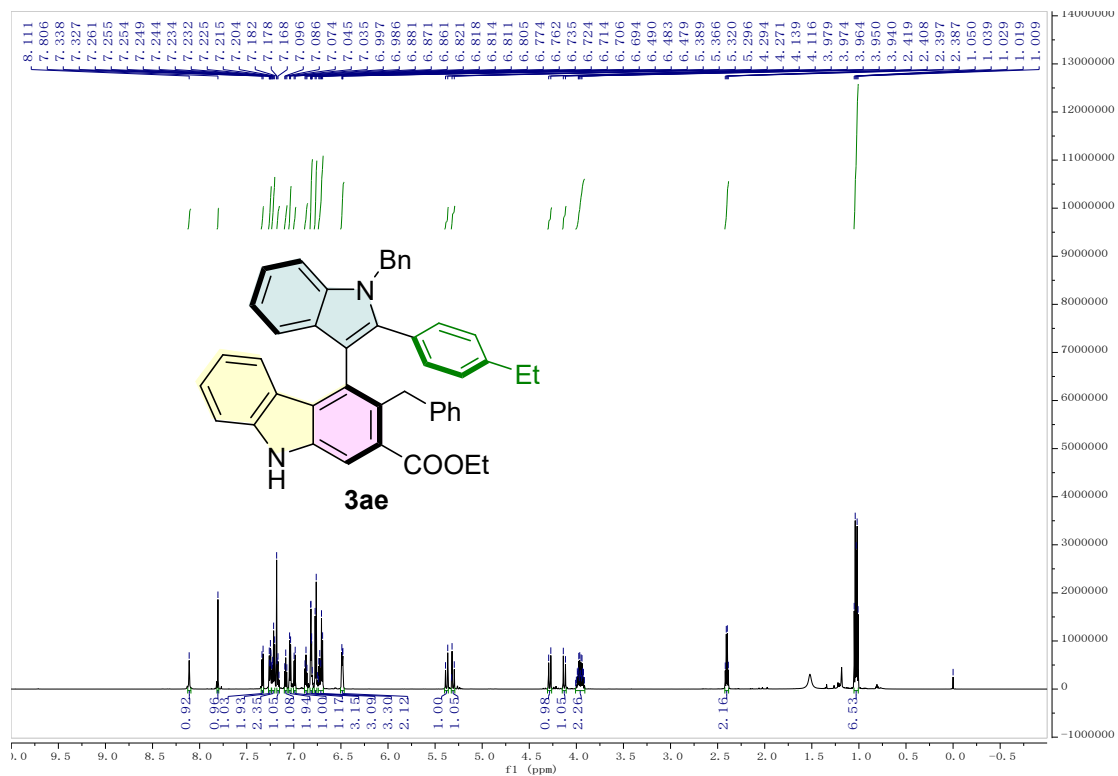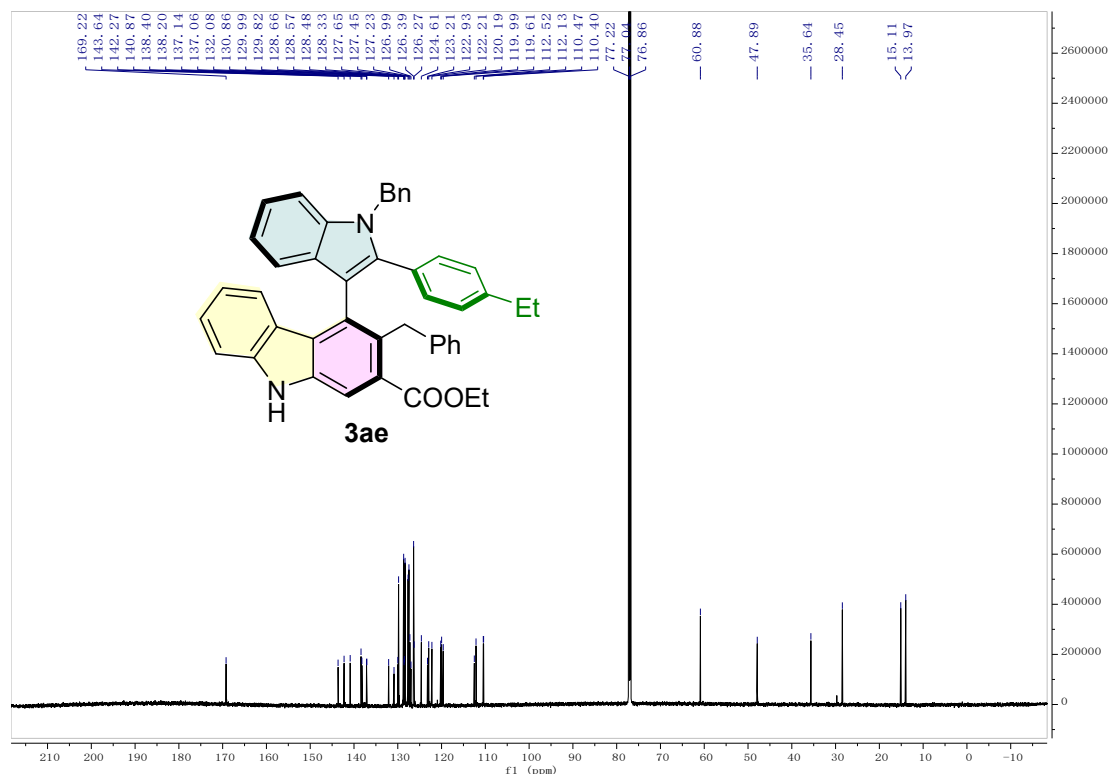

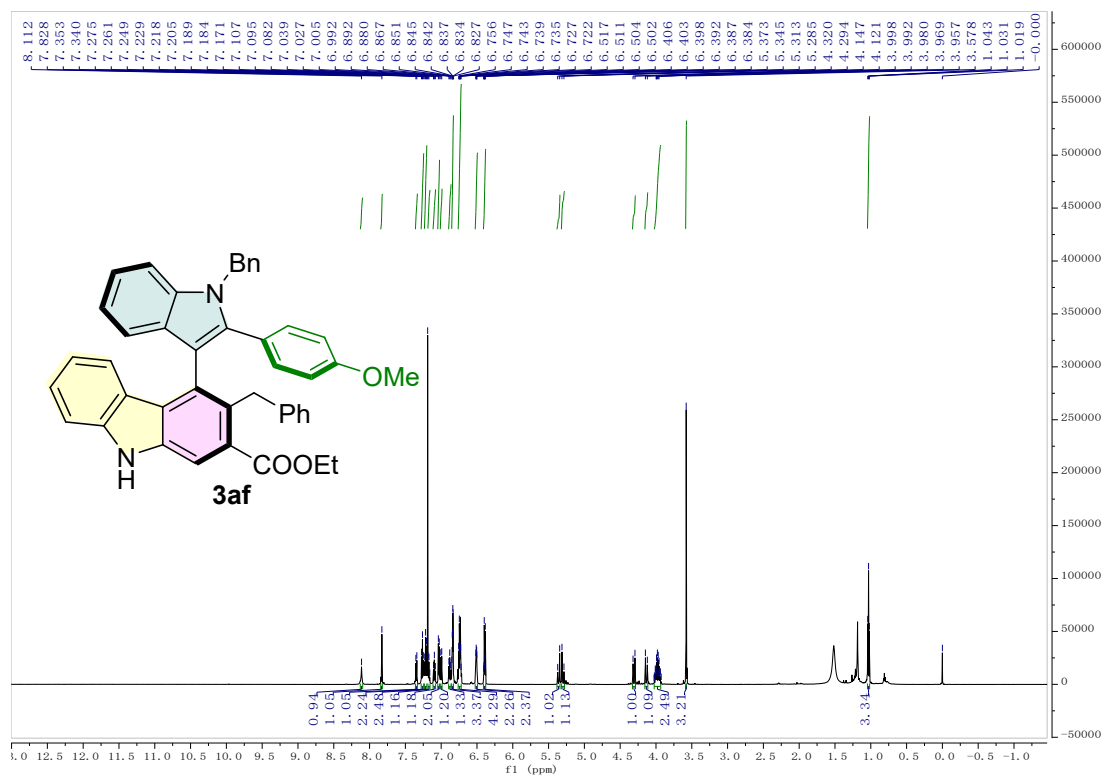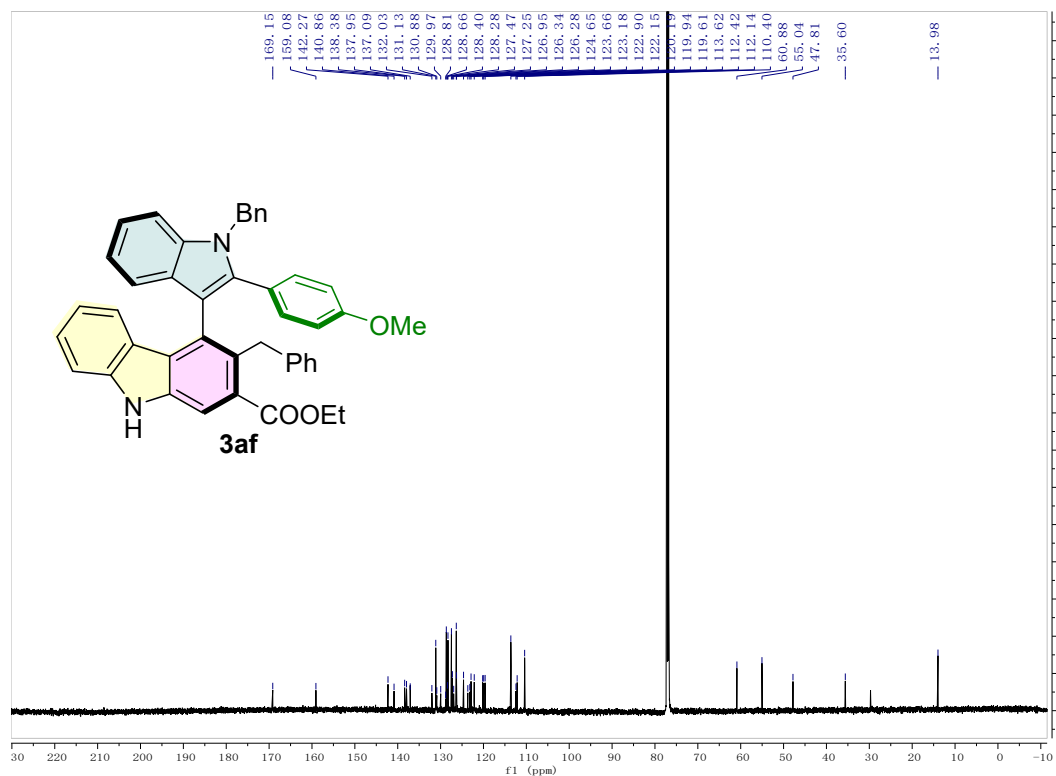

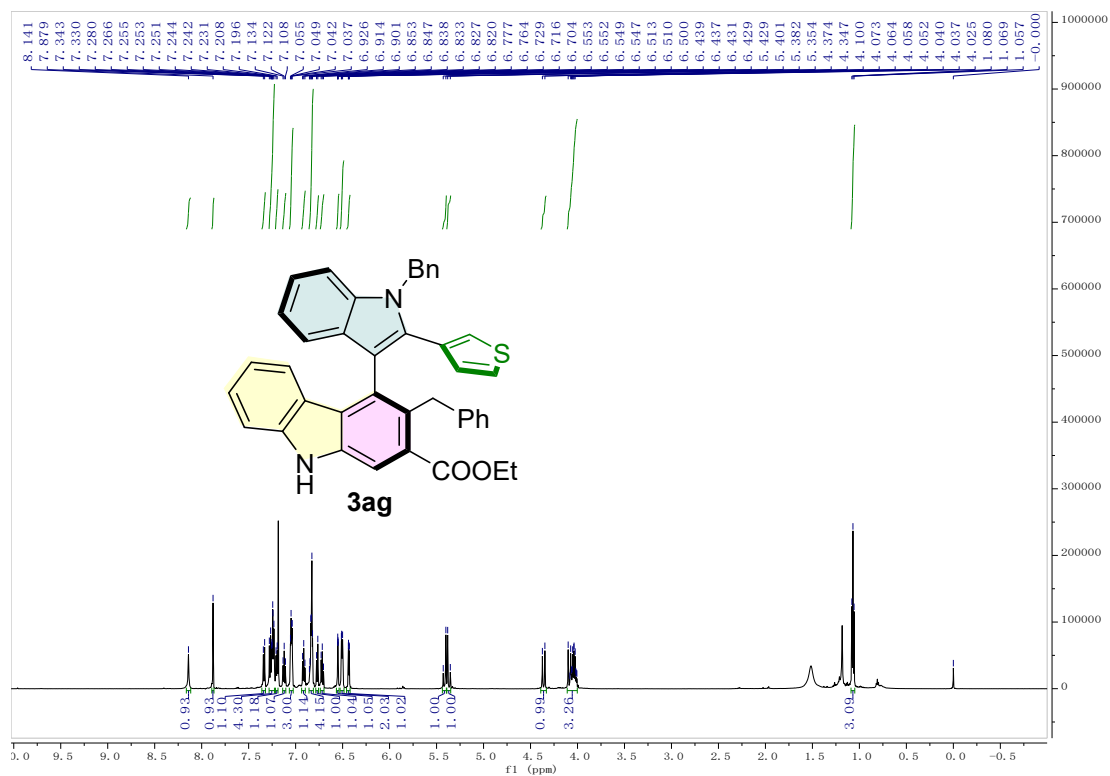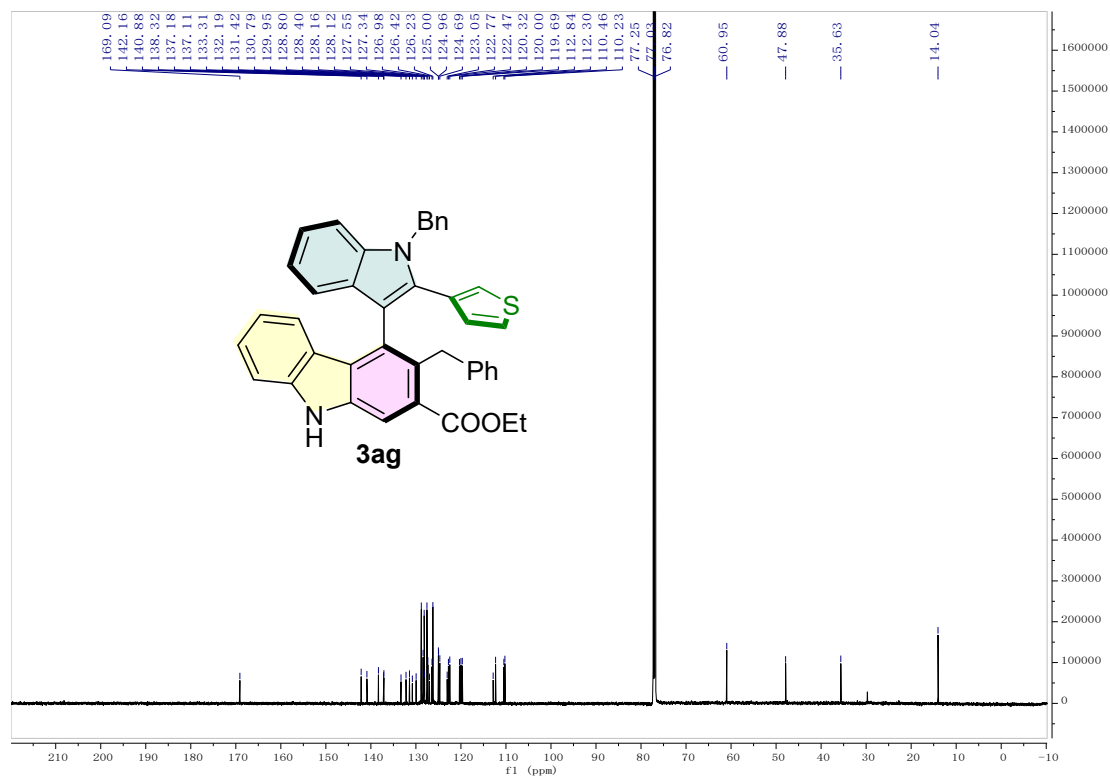

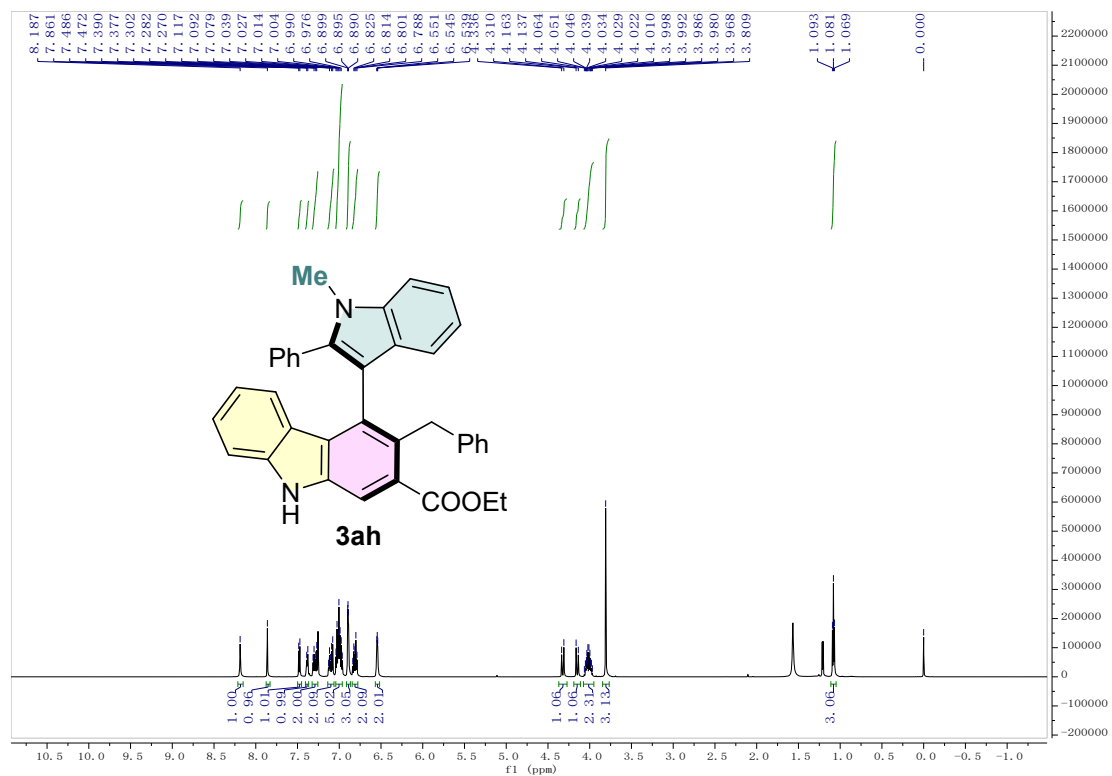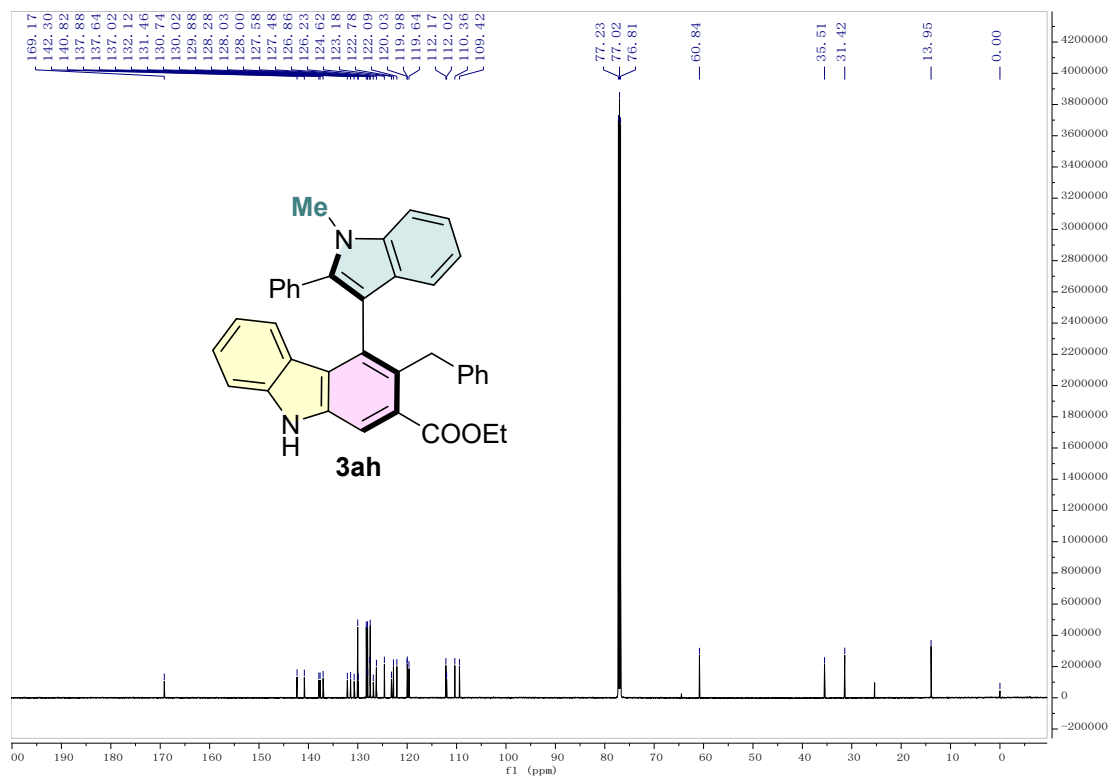



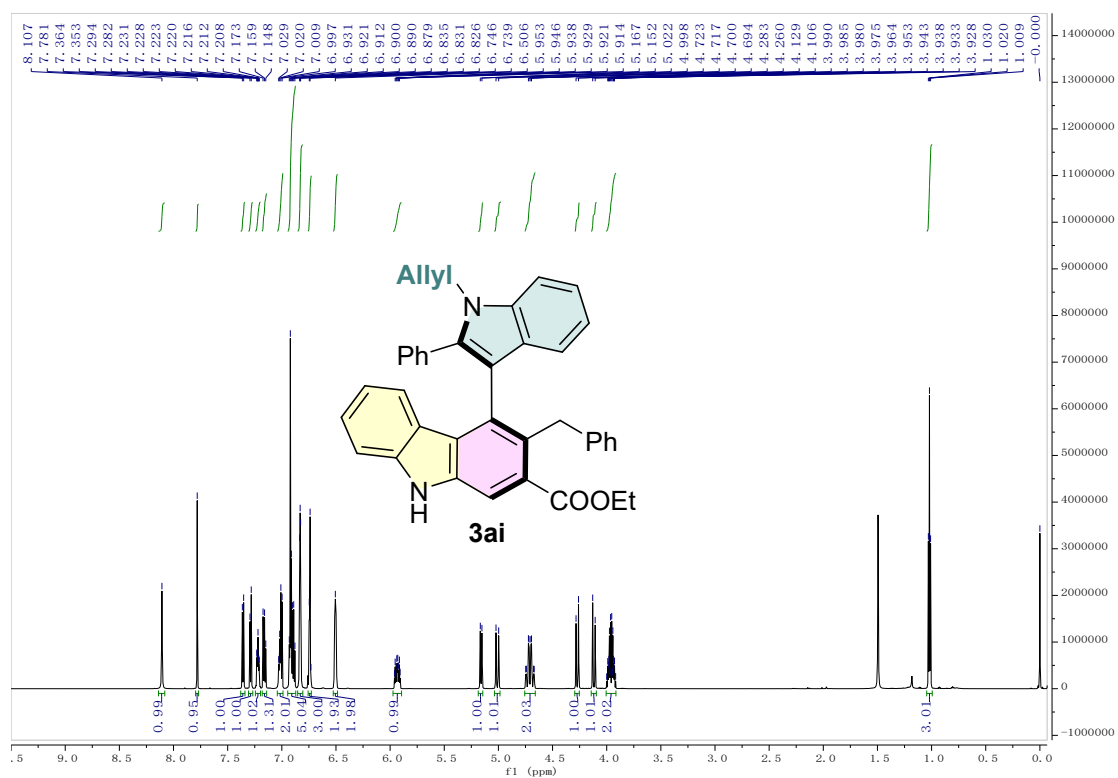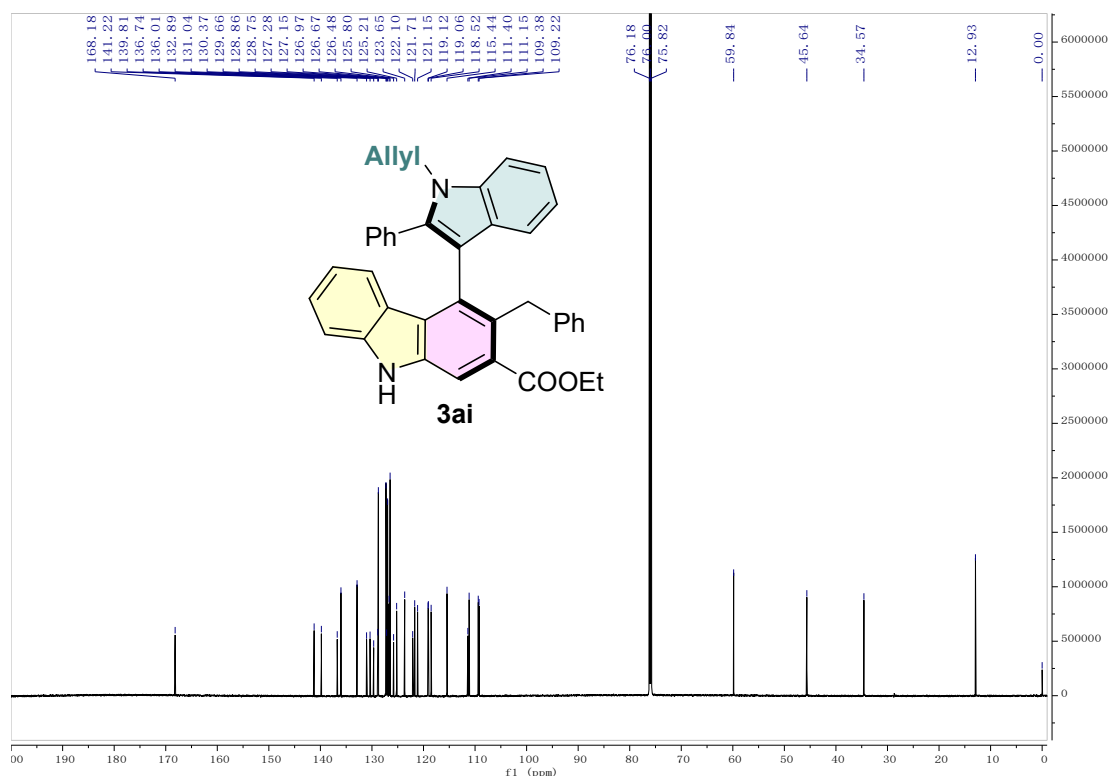

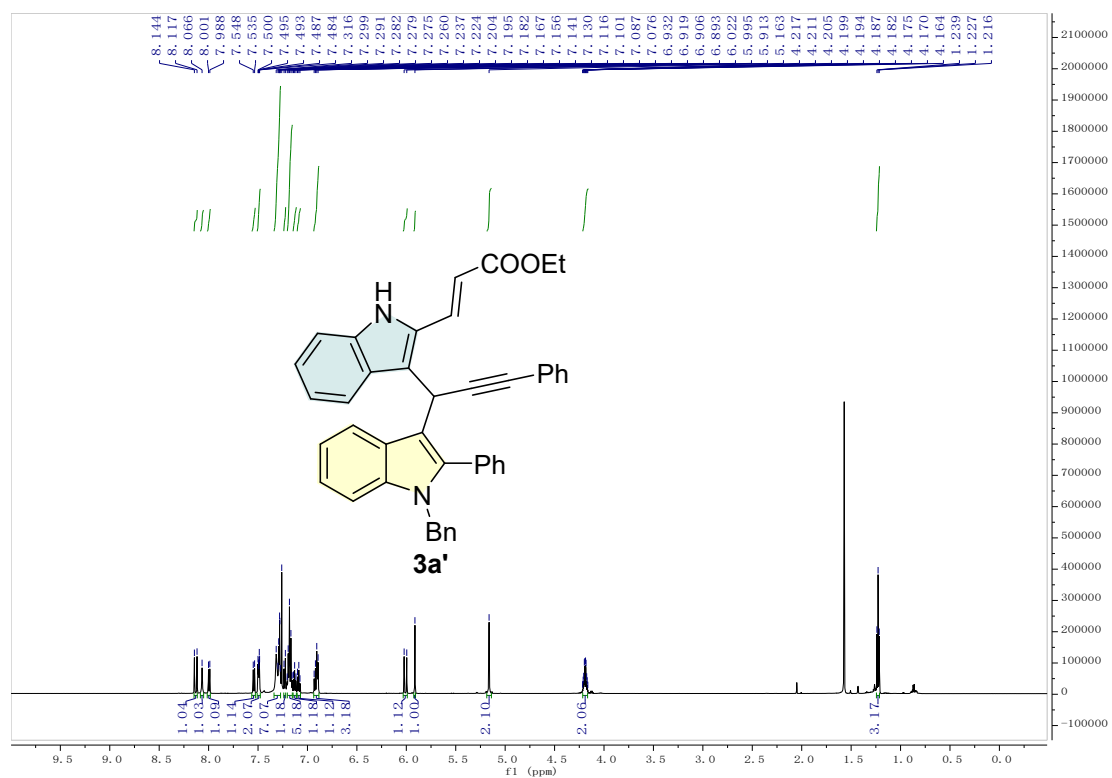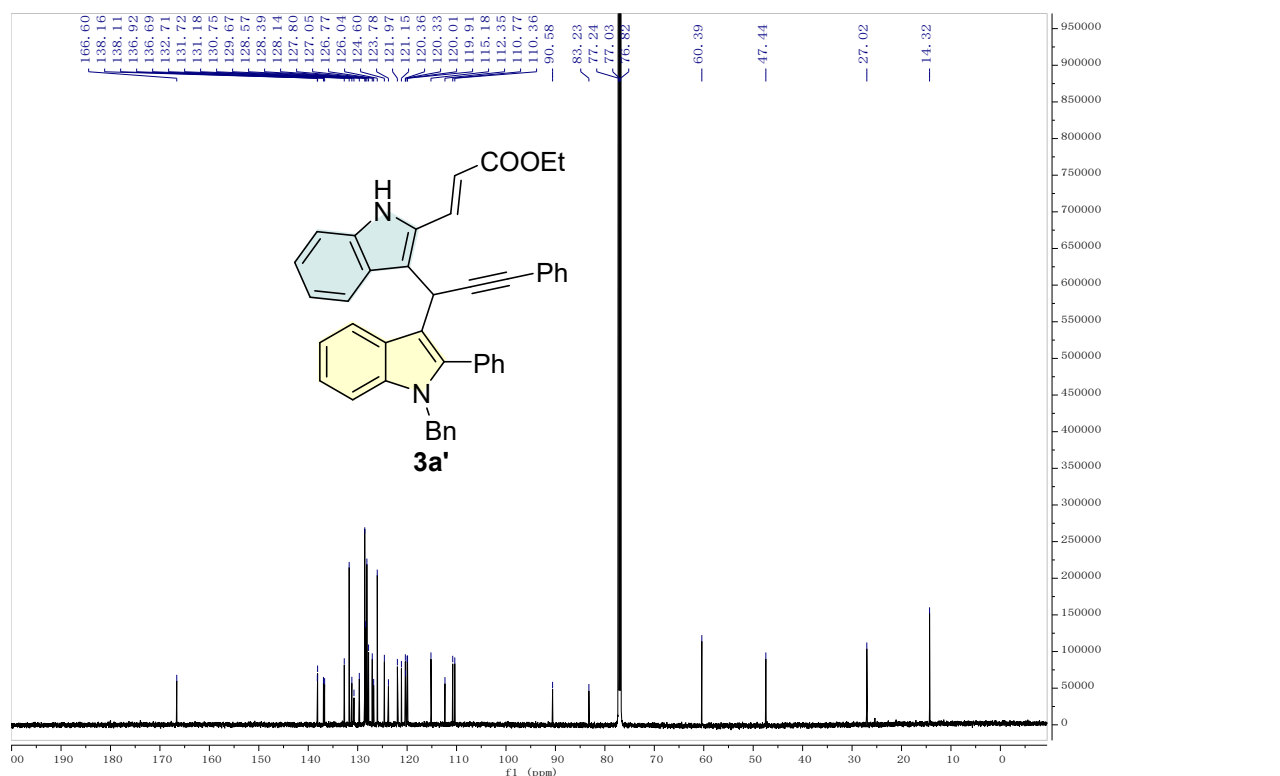

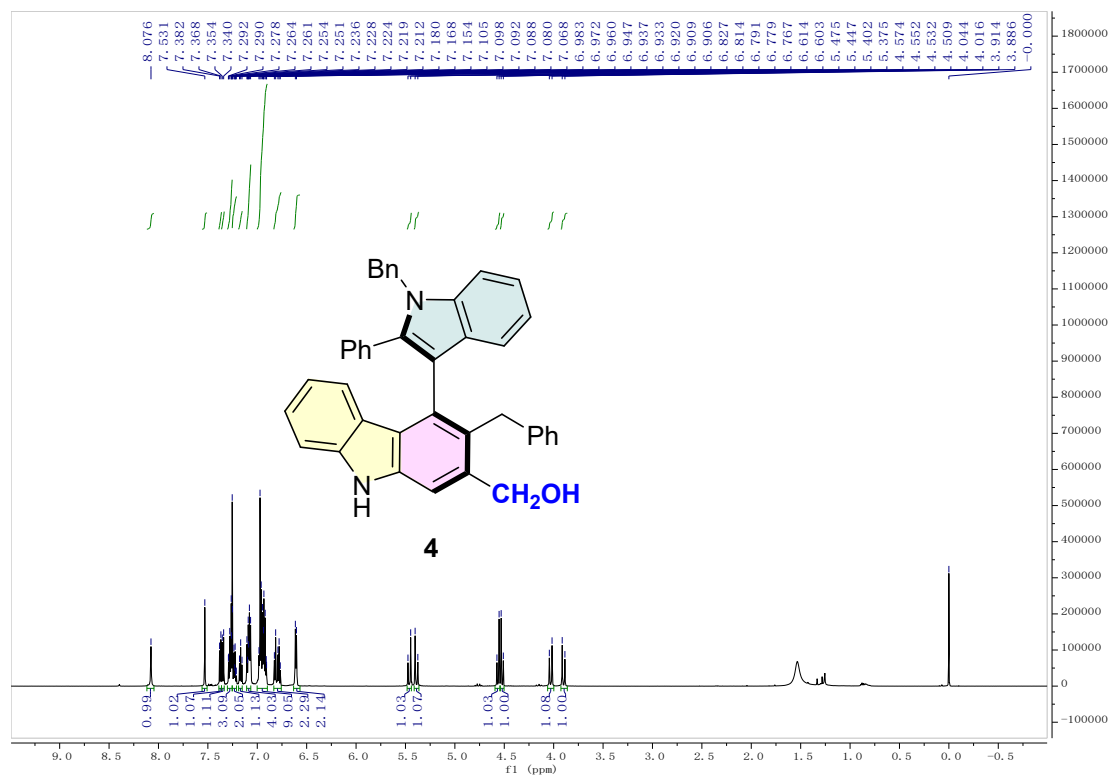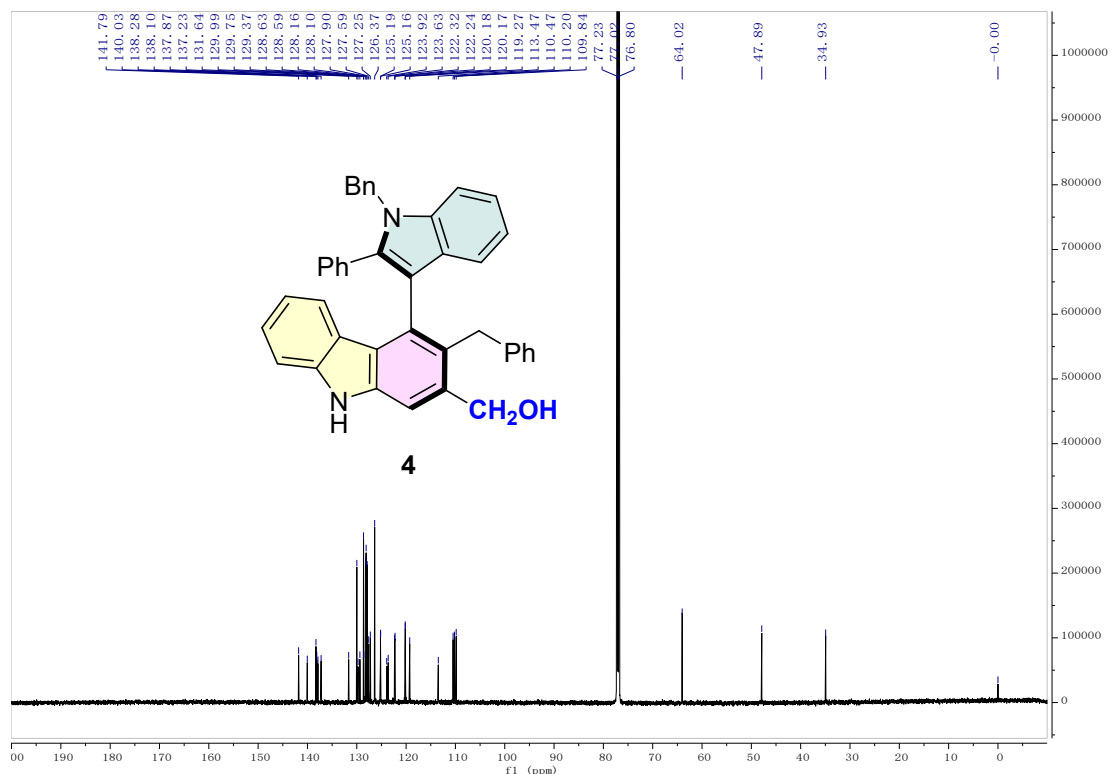

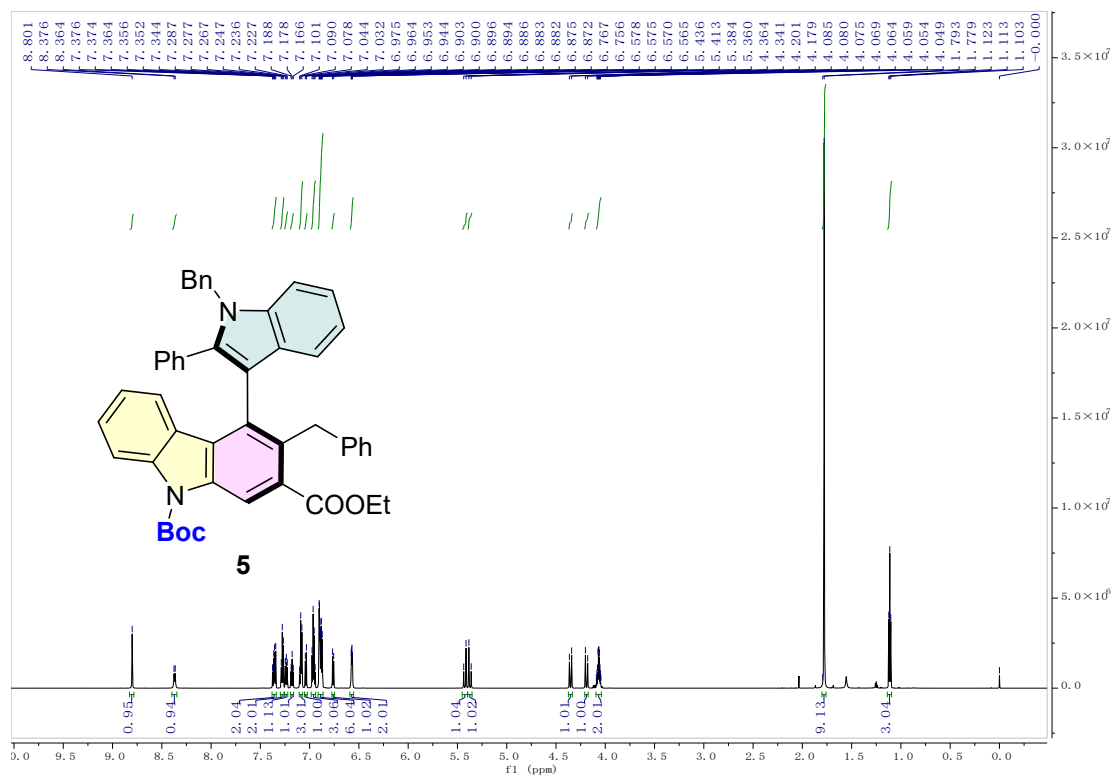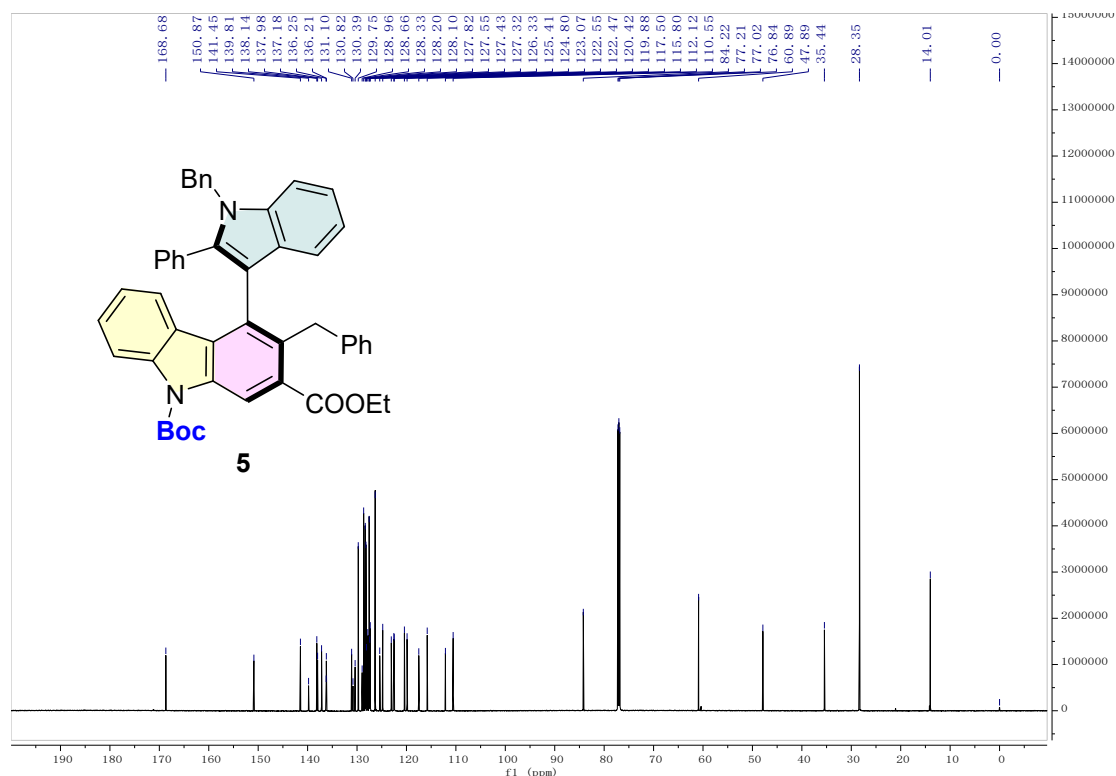

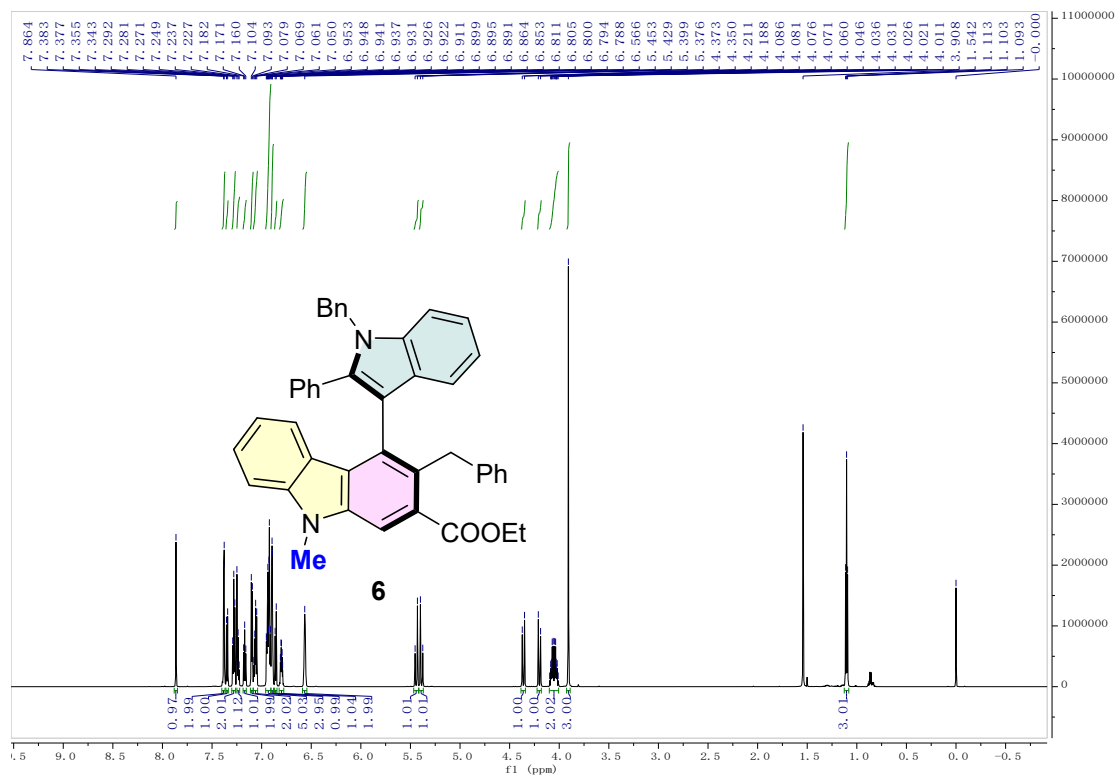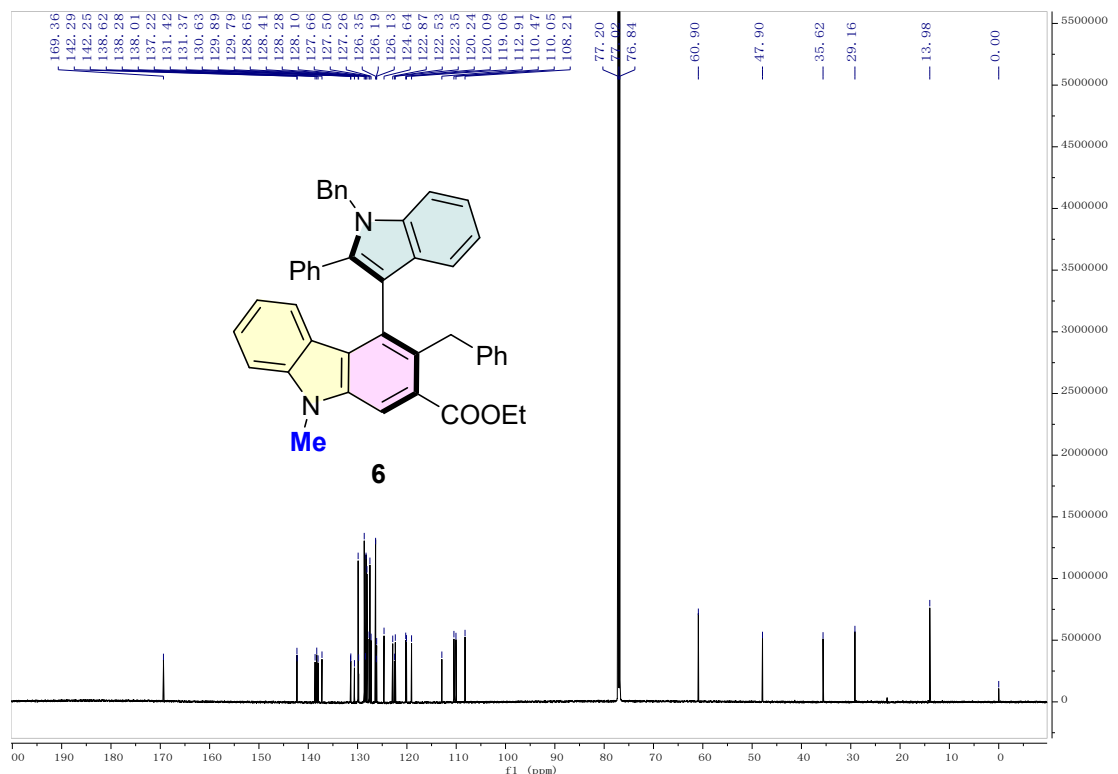

## 11. Reference

1. Zhang, J.; Gao, Y. S.; Gu, B. M.; Yang, W. L.; Tian, B. X.; Deng, W. P., Cooperative N-heterocyclic Carbene and Iridium Catalysis Enables Stereoselective and Regiodivergent 3+2 and 3+3 Annulation Reactions. *Acs Catalysis* **2021**, *11*, 3810-3821.
2. Wu, C. Y.; Yu, Y. N.; Xu, M. H., Construction of Chiral Tricyclic Indoles through a Rhodium-Catalyzed Asymmetric Arylation Protocol. *Organic Letters* **2017**, *19*, 384-387.
3. Huang, L.; Dai, L. X.; You, S. L., Enantioselective Synthesis of Indole-Annulated Medium-Sized Rings. *Journal of the American Chemical Society* **2016**, *138*, 5793-5796.
4. Zhao, C.; Toste, F. D.; Bergman, R. G., Direct Michael Addition of Alkenes via a Cobalt-Dinitrosyl Mediated Vinylic C-H Functionalization Reaction. *Journal of the American Chemical Society* **2011**, *133*, 10787-10789.
5. Singh, S.; Samineni, R.; Pabbaraja, S.; Mehta, G., A General Carbazole Synthesis via Stitching of Indole-Ynones with Nitromethanes: Application to Total Synthesis of Carbazomycin A, Calothrixin B, and Staurosporinone. *Organic Letters* **2019**, *21*, 3372-3376.
6. Mader, S.; Maji, M. S.; Atodiresei, I.; Rueping, M., Bronsted acid catalyzed enantioselective addition of hydrazones to 3-indolylmethanols. *Organic Chemistry Frontiers* **2022**, *9*, 4466-4471.
7. (a) E. L. Eliel, & S. Wilen, Stereochemistry of organic compounds. (Wiley Interscience: New York, 1994). (b) A. Ahmed, R. A. Bragg, J. Clayden, L. W. Lai, C. McCarthy, J. H. Pink, N. Westlund, S. A. Yasin, *Tetrahedron*, **1998**, *54*, 13277-13294. (c) M. Reist, B. Testa, P. A. Carrupt, M. Jung, V. Schurig, *Chirality*, **2004**, *7*, 396-400. (d) L. Jin, Q. J. Yao, P. P. Xie, Y. Li, B. B. Zhan, Y. Q. Han, X. Hong, B. F. Shi, *Chem*, **2020**, *6*, 497-511. (e) X. Yang, L. Wei, Y. Wu, L. Zhou, X. Zhang, Y. R. Chi, *Angew. Chem. Int. Ed.* **2023**, *135*, e202211977. (f) B. B. Zhan, L. Wang, J. Luo, X. F. Lin, B. F. Shi, *Angew. Chem. Int. Ed.* **2020**, *59*, 3568. (g) K. T. Barrett, A. J. Metrano, P. R. Rablen, S. J. Miller, *Nature*, **2014**, *509*, 71-75. (h) F. Wu, Y. Zhang, R. Zhu, Y. Huang, *Nat. Chem.*, **2023**, *16*, 132-139.
8. Brouwer, A. M., Standards for photoluminescence quantum yield measurements in

solution (IUPAC Technical Report). *Pure and Applied Chemistry* **2011**, 83, 2213-2228.
